# Supplementary material for: Transcriptome Analysis of the Trachinotus ovatus: Identification of Reproduction, Growth and Immune-Related Genes and Microsatellite Markers
Source: PLoS One. 2014 Oct 10;9(10):e109419. doi: 10.1371/journal.pone.0109419 (PMC4193775; doi:10.1371/journal.pone.0109419)
Supplement: Table S4 — IGF/IGFR signaling pathways. (XLSX) [file pone.0109419.s005.xlsx]

## Sheet: igf.gene.list.pathway
IGF/IGFR signaling pathways
#Pathway	Count (38172)	Pathway ID	N_T_G	Target_Genes	Genes	KOs
Pathways in cancer	1763	ko05200	16	>Unigene0001375;>Unigene0001376;>Unigene0004274;>Unigene0011216;>Unigene0029429;>Unigene0046561;>Unigene0050569;>Unigene0053007;>Unigene0096030;>Unigene0101300;>Unigene0109030;>Unigene0118200;>Unigene0121904;>Unigene0133774;>Unigene0140527;>Unigene0149630;	Unigene0000001;Unigene0000398;Unigene0000505;Unigene0001323;Unigene0001375;Unigene0001376;Unigene0002847;Unigene0002972;Unigene0003044;Unigene0004201;Unigene0004274;Unigene0004464;Unigene0004695;Unigene0004782;Unigene0004945;Unigene0005156;Unigene0005348;Unigene0005490;Unigene0005491;Unigene0006056;Unigene0006057;Unigene0006058;Unigene0006481;Unigene0006523;Unigene0006876;Unigene0006989;Unigene00…	K06237+K04388+K00182+K05087+K06240+K06765+K06230+K07827+K04358+K11988+K09849+K08528+K04379+K08775+K06244+K06225+K00714+K00444+K00408+K04662+K04501+K08524+K02649+K05449+K04492+K02353+K04393+K08735+K04385+K03173+K05092+K05637+K02089+K08878+K04706+K06231+K04462+K06228+K08731+K10055+K04398+K04361+K06485+K04364+K01398+K08268+K04377+K04079+K04389+K01064+K04438+K05636+K08734+K06620+K05635+K06482+K13375+…
Focal adhesion	1211	ko04510	16	>Unigene0001375;>Unigene0001376;>Unigene0004274;>Unigene0011216;>Unigene0029429;>Unigene0046561;>Unigene0050569;>Unigene0053007;>Unigene0096030;>Unigene0101300;>Unigene0109030;>Unigene0118200;>Unigene0121904;>Unigene0133774;>Unigene0140527;>Unigene0149630;	Unigene0000001;Unigene0001311;Unigene0001375;Unigene0001376;Unigene0001468;Unigene0001998;Unigene0002847;Unigene0003412;Unigene0004214;Unigene0004274;Unigene0004401;Unigene0004695;Unigene0004945;Unigene0005013;Unigene0005203;Unigene0005258;Unigene0005469;Unigene0005640;Unigene0006373;Unigene0006374;Unigene0006523;Unigene0006876;Unigene0007311;Unigene0007312;Unigene0007718;Unigene0007765;Unigene00…	K06237+K06236+K05087+K04659+K05699+K06240+K12757+K10351+K12758+K00907+K06589+K06244+K06238+K06270+K02649+K05449+K06279+K04393+K05732+K05637+K05760+K04361+K05700+K06485+K04364+K06251+K04438+K06278+K05636+K05635+K06271+K06583+K06482+K05692+K05725+K04410+K03099+K06243+K05448+K04440+K04363+K06275+K05703+K05704+K04456+K04513+K00922+K04514+K06493+K05717+K06272+K04366+K05730+K05096+K05097+K05089+K06588+…
Endocytosis	1119	ko04144	14	>Unigene0001375;>Unigene0001376;>Unigene0004274;>Unigene0011216;>Unigene0046561;>Unigene0050569;>Unigene0053007;>Unigene0096030;>Unigene0101300;>Unigene0118200;>Unigene0121904;>Unigene0133774;>Unigene0140527;>Unigene0149630;	Unigene0000398;Unigene0001375;Unigene0001376;Unigene0003743;Unigene0003744;Unigene0003868;Unigene0003869;Unigene0004274;Unigene0004591;Unigene0005996;Unigene0007036;Unigene0008038;Unigene0008601;Unigene0008769;Unigene0008968;Unigene0009038;Unigene0009217;Unigene0009861;Unigene0009908;Unigene0010401;Unigene0010585;Unigene0011216;Unigene0011570;Unigene0011702;Unigene0011824;Unigene0011835;Unigene00…	K04388+K05087+K12488+K06751+K04141+K05085+K12471+K04439+K04393+K01528+K04644+K04180+K12494+K04678+K03283+K04361+K12484+K07897+K07904+K12486+K05084+K12186+K12472+K08291+K12199+K06278+K12200+K11248+K12491+K11247+K13305+K04645+K12188+K13375+K06069+K00910+K12490+K12474+K12196+K07892+K05093+K11824+K05050+K04175+K04363+K12489+K05704+K12495+K12493+K04707+K01115+K04513+K12470+K05069+K09526+K12479+K07891+…
Regulation of actin cytoskeleton	1041	ko04810	1	>Unigene0004274;	Unigene0001998;Unigene0002989;Unigene0003099;Unigene0004154;Unigene0004201;Unigene0004214;Unigene0004274;Unigene0004401;Unigene0004464;Unigene0005013;Unigene0005156;Unigene0005640;Unigene0006373;Unigene0006374;Unigene0007120;Unigene0007765;Unigene0007922;Unigene0008968;Unigene0009439;Unigene0009497;Unigene0009858;Unigene0009860;Unigene0009899;Unigene0010153;Unigene0010291;Unigene0011401;Unigene00…	K05699+K05748+K05755+K04526+K07827+K12757+K05086+K10351+K12758+K04358+K00907+K06589+K06270+K02649+K04393+K05732+K05731+K05741+K07830+K07829+K05760+K05763+K04361+K05700+K06485+K04438+K13710+K06464+K07532+K05747+K05751+K06583+K06482+K05766+K05692+K05725+K04410+K00921+K05093+K03099+K05627+K04363+K04639+K05745+K05742+K12330+K04513+K00922+K04514+K05743+K06493+K05717+K04362+K05746+K08845+K04366+K05722+…
Insulin signaling pathway	801	ko04910	3	>Unigene0065336;>Unigene0114933;>Unigene0117043;	Unigene0002838;Unigene0003218;Unigene0004154;Unigene0004201;Unigene0005438;Unigene0006270;Unigene0007922;Unigene0008019;Unigene0009022;Unigene0009665;Unigene0009742;Unigene0011918;Unigene0011957;Unigene0012494;Unigene0012652;Unigene0013824;Unigene0013825;Unigene0013946;Unigene0013947;Unigene0013986;Unigene0015068;Unigene0015632;Unigene0015633;Unigene0015635;Unigene0015670;Unigene0015761;Unigene00…	K07198+K13296+K04526+K07827+K07187+K00688+K02649+K06279+K07207+K03841+K07206+K04364+K07190+K07202+K04438+K04696+K07197+K07208+K12406+K06069+K06086+K04372+K07200+K04694+K00871+K03099+K00693+K04440+K01084+K04345+K11262+K04707+K04456+K07188+K00922+K05695+K08845+K04366+K07195+K07192+K03084+K07204+K04688+K04371+K03259+K07201+K07189+K06277+K07199+K02183+K00844+K06269+K04527+K04739+K04365+K07203+K05696+…
Adherens junction	757	ko04520	17	>Unigene0001375;>Unigene0001376;>Unigene0004274;>Unigene0011216;>Unigene0046561;>Unigene0050569;>Unigene0053007;>Unigene0065336;>Unigene0096030;>Unigene0101300;>Unigene0114933;>Unigene0117043;>Unigene0118200;>Unigene0121904;>Unigene0133774;>Unigene0140527;>Unigene0149630;	Unigene0000398;Unigene0001375;Unigene0001376;Unigene0001998;Unigene0002989;Unigene0004274;Unigene0006373;Unigene0006374;Unigene0007643;Unigene0007963;Unigene0007964;Unigene0008131;Unigene0008428;Unigene0008968;Unigene0009497;Unigene0010711;Unigene0011216;Unigene0011685;Unigene0011702;Unigene0011793;Unigene0011794;Unigene0014415;Unigene0014494;Unigene0014698;Unigene0014814;Unigene0014815;Unigene00…	K04388+K05087+K05699+K05748+K04501+K06085+K04492+K06081+K04393+K04468+K04361+K05700+K05747+K06084+K05692+K06086+K05690+K05627+K04491+K05703+K05705+K05704+K05693+K04513+K06083+K05695+K04362+K05702+K05694+K05753+K04371+K06082+K04498+K05701+K04500+K05698+K06531+K04237+K02620+K06592+K04674+K04427+K02105+K05706+K04527+K03097+K03115+K05696+K07861+K04392+K06593+K05691+K05099+K04490+K05689+K07860+K05083+…
Dilated cardiomyopathy	591	ko05414	2	>Unigene0029429;>Unigene0109030;	Unigene0000478;Unigene0001202;Unigene0002284;Unigene0002943;Unigene0003059;Unigene0003278;Unigene0003935;Unigene0003987;Unigene0004401;Unigene0004698;Unigene0005640;Unigene0005936;Unigene0006173;Unigene0006759;Unigene0006760;Unigene0007036;Unigene0007335;Unigene0008509;Unigene0008673;Unigene0009206;Unigene0009265;Unigene0009536;Unigene0009537;Unigene0009558;Unigene0009559;Unigene0010143;Unigene00…	K05852+K07610+K12044+K08042+K08044+K12563+K04853+K10351+K08043+K06589+K04851+K12564+K04141+K05865+K12568+K04962+K04861+K04858+K10366+K04857+K04864+K08046+K06485+K04860+K08049+K06856+K06583+K06482+K04859+K13375+K05692+K12566+K08041+K04863+K04345+K09290+K10373+K10375+K04865+K06493+K08047+K06588+K04873+K04850+K06476+K06584+K06480+K04868+K05459+K08048+K12314+K04871+K08045+K06481+K13376+K06487+K12641+…
Oocyte meiosis	533	ko04114	16	>Unigene0001375;>Unigene0001376;>Unigene0004274;>Unigene0011216;>Unigene0029429;>Unigene0046561;>Unigene0050569;>Unigene0053007;>Unigene0096030;>Unigene0101300;>Unigene0109030;>Unigene0118200;>Unigene0121904;>Unigene0133774;>Unigene0140527;>Unigene0149630;	Unigene0001375;Unigene0001376;Unigene0002943;Unigene0003059;Unigene0003278;Unigene0004154;Unigene0004274;Unigene0004698;Unigene0004871;Unigene0005394;Unigene0006317;Unigene0010600;Unigene0011115;Unigene0011216;Unigene0012047;Unigene0012340;Unigene0014331;Unigene0014911;Unigene0016259;Unigene0016260;Unigene0016261;Unigene0016262;Unigene0016666;Unigene0017587;Unigene0017590;Unigene0017591;Unigene00…	K05087+K08042+K08044+K04526+K08043+K04958+K04960+K08046+K03351+K08049+K11580+K04382+K03348+K08041+K13728+K03350+K04345+K06268+K04348+K08836+K11584+K04515+K08047+K02602+K04959+K04371+K03362+K04373+K05459+K08048+K06630+K08045+K03349+K02206+K02183+K08557+K08556+K13055+K05861+K03353+K13054+K06269+K03352+K03359+K11481+K06636+K03354+K03355+K06631+K06633+K04367+K06626+K06669+K03358+K02087+K03363+K12456+…
Long-term depression	508	ko04730	16	>Unigene0001375;>Unigene0001376;>Unigene0004274;>Unigene0011216;>Unigene0029429;>Unigene0046561;>Unigene0050569;>Unigene0053007;>Unigene0096030;>Unigene0101300;>Unigene0109030;>Unigene0118200;>Unigene0121904;>Unigene0133774;>Unigene0140527;>Unigene0149630;	Unigene0001375;Unigene0001376;Unigene0004201;Unigene0004274;Unigene0004871;Unigene0005394;Unigene0006317;Unigene0008021;Unigene0008022;Unigene0008661;Unigene0010600;Unigene0011216;Unigene0012309;Unigene0013472;Unigene0013473;Unigene0015567;Unigene0015829;Unigene0015830;Unigene0015904;Unigene0015906;Unigene0015934;Unigene0016186;Unigene0016187;Unigene0016189;Unigene0016259;Unigene0016260;Unigene00…	K05087+K07827+K04958+K01047+K04961+K04960+K05199+K07376+K12319+K05207+K04630+K04382+K05858+K04639+K12318+K04604+K04344+K04578+K08845+K04366+K05197+K05198+K04959+K04371+K02677+K04634+K04635+K05854+K05459+K05256+K04365+K04534+K04369+K13240+K04346+K04632+K03456+K04535+K04368+K02833
Hypertrophic cardiomyopathy (HCM)	499	ko05410	2	>Unigene0029429;>Unigene0109030;	Unigene0001202;Unigene0002284;Unigene0002838;Unigene0003935;Unigene0003987;Unigene0004401;Unigene0005640;Unigene0005936;Unigene0006173;Unigene0006759;Unigene0006760;Unigene0007335;Unigene0008509;Unigene0008673;Unigene0009049;Unigene0009206;Unigene0009265;Unigene0009536;Unigene0009537;Unigene0009558;Unigene0009559;Unigene0010143;Unigene0011851;Unigene0012148;Unigene0012440;Unigene0012441;Unigene00…	K07610+K12044+K07198+K12563+K04853+K10351+K06589+K04851+K12564+K05865+K12568+K04962+K01283+K04861+K04858+K10366+K04857+K04864+K06485+K04860+K06583+K06482+K04859+K13375+K05692+K12566+K07200+K04863+K09290+K10373+K10375+K04865+K06493+K06588+K04873+K04850+K06476+K06584+K06480+K04868+K05459+K12314+K04871+K06481+K13376+K06487+K07199+K12641+K12045+K05227+K06587+K04872+K04862+K06591+K04866+K10374+K12567+…
Lysosome	447	ko04142	4	>Unigene0018833;>Unigene0043181;>Unigene0068908;>Unigene0121270;	Unigene0000217;Unigene0005556;Unigene0009217;Unigene0011113;Unigene0011114;Unigene0011807;Unigene0012528;Unigene0012612;Unigene0014040;Unigene0014073;Unigene0014223;Unigene0014224;Unigene0014414;Unigene0014419;Unigene0014519;Unigene0015102;Unigene0015241;Unigene0015242;Unigene0015243;Unigene0015244;Unigene0015288;Unigene0015378;Unigene0015415;Unigene0015656;Unigene0015725;Unigene0015726;Unigene00…	K12387+K01319+K04644+K02154+K12348+K12397+K01189+K12386+K12402+K08568+K12400+K01204+K01074+K12398+K01136+K04645+K12311+K01158+K12307+K03661+K01371+K01201+K12404+K06564+K04992+K12305+K12399+K12301+K12385+K12309+K01134+K01379+K01186+K06546+K03662+K12394+K12396+K12384+K01374+K12391+K01365+K01368+K05642+K01202+K12401+K12389+K01132+K01192+K01363+K10532+K12395+K12403+K12373+K12393+K12388+K01366+K10087+…
Prostate cancer	432	ko05215	16	>Unigene0001375;>Unigene0001376;>Unigene0004274;>Unigene0011216;>Unigene0029429;>Unigene0046561;>Unigene0050569;>Unigene0053007;>Unigene0096030;>Unigene0101300;>Unigene0109030;>Unigene0118200;>Unigene0121904;>Unigene0133774;>Unigene0140527;>Unigene0149630;	Unigene0001375;Unigene0001376;Unigene0004154;Unigene0004201;Unigene0004274;Unigene0007922;Unigene0008131;Unigene0010098;Unigene0010674;Unigene0011216;Unigene0011702;Unigene0011957;Unigene0012467;Unigene0012468;Unigene0012469;Unigene0013986;Unigene0014940;Unigene0014941;Unigene0014942;Unigene0014943;Unigene0015790;Unigene0016958;Unigene0016959;Unigene0017016;Unigene0017017;Unigene0017456;Unigene00…	K05087+K04526+K07827+K05086+K02649+K04492+K09048+K05870+K04361+K04364+K04079+K06620+K04467+K05093+K03099+K04363+K04399+K04491+K04456+K09047+K00922+K04362+K08845+K04366+K05089+K04371+K01110+K04359+K04498+K05459+K06625+K07201+K02620+K06618+K06643+K02206+K04735+K07210+K04503+K08557+K02105+K12344+K04451+K04365+K07203+K04734+K02580+K07209+K09487+K04369+K09389+K03083+K06624+K05450+K06626+K04490+K06276+…
Glioma	413	ko05214	16	>Unigene0001375;>Unigene0001376;>Unigene0004274;>Unigene0011216;>Unigene0029429;>Unigene0046561;>Unigene0050569;>Unigene0053007;>Unigene0096030;>Unigene0101300;>Unigene0109030;>Unigene0118200;>Unigene0121904;>Unigene0133774;>Unigene0140527;>Unigene0149630;	Unigene0001375;Unigene0001376;Unigene0004201;Unigene0004274;Unigene0007922;Unigene0008019;Unigene0009665;Unigene0010411;Unigene0011216;Unigene0011702;Unigene0011957;Unigene0013986;Unigene0014940;Unigene0014941;Unigene0014942;Unigene0014943;Unigene0017016;Unigene0017017;Unigene0017456;Unigene0017457;Unigene0017813;Unigene0018394;Unigene0019405;Unigene0019554;Unigene0019556;Unigene0019587;Unigene00…	K05087+K07827+K02649+K06279+K02089+K04361+K04364+K06620+K03099+K04363+K05859+K04456+K00922+K08845+K04366+K04515+K05089+K04371+K01110+K02677+K04359+K05459+K06625+K06618+K02091+K06643+K04503+K02183+K04451+K04365+K07203+K04369+K09389+K04357+K04368+K02833+K08774
Progesterone-mediated oocyte maturation	408	ko04914	16	>Unigene0001375;>Unigene0001376;>Unigene0004274;>Unigene0011216;>Unigene0029429;>Unigene0046561;>Unigene0050569;>Unigene0053007;>Unigene0096030;>Unigene0101300;>Unigene0109030;>Unigene0118200;>Unigene0121904;>Unigene0133774;>Unigene0140527;>Unigene0149630;	Unigene0001375;Unigene0001376;Unigene0002943;Unigene0003059;Unigene0003218;Unigene0003278;Unigene0004154;Unigene0004201;Unigene0004274;Unigene0004698;Unigene0007922;Unigene0009147;Unigene0010701;Unigene0011115;Unigene0011216;Unigene0011839;Unigene0012047;Unigene0012340;Unigene0012467;Unigene0012468;Unigene0012469;Unigene0013986;Unigene0014331;Unigene0015266;Unigene0015267;Unigene0015268;Unigene00…	K05087+K08042+K13296+K08044+K04526+K07827+K08043+K02649+K05868+K08046+K06638+K03351+K04079+K08049+K04441+K04630+K03364+K03348+K04440+K08041+K13728+K03350+K04345+K04456+K00922+K08845+K04366+K08047+K02602+K04371+K04373+K05459+K08048+K08045+K03349+K02206+K08556+K03353+K06627+K03352+K03359+K04365+K03354+K05866+K03355+K06631+K06633+K04367+K03358+K02087+K12456+K02537+K08694+K04368+K02178
mTOR signaling pathway	380	ko04150	2	>Unigene0029429;>Unigene0109030;	Unigene0002838;Unigene0004154;Unigene0007922;Unigene0007951;Unigene0009022;Unigene0011918;Unigene0012239;Unigene0013986;Unigene0015632;Unigene0015633;Unigene0015635;Unigene0017251;Unigene0017252;Unigene0017253;Unigene0017254;Unigene0017700;Unigene0019328;Unigene0019336;Unigene0019339;Unigene0019341;Unigene0019342;Unigene0019343;Unigene0019344;Unigene0019345;Unigene0019347;Unigene0019348;Unigene00…	K07198+K04526+K02649+K05449+K07207+K07206+K08268+K07208+K05448+K08271+K04456+K00922+K08269+K08272+K07204+K04688+K04371+K03259+K04373+K05459+K03258+K08267+K08270+K04365+K07203+K07205+K02991+K08266+K06276+K07298
Type II diabetes mellitus	345	ko04930	3	>Unigene0065336;>Unigene0114933;>Unigene0117043;	Unigene0002264;Unigene0004154;Unigene0005438;Unigene0005936;Unigene0006759;Unigene0006760;Unigene0007922;Unigene0008919;Unigene0009014;Unigene0009540;Unigene0009541;Unigene0009542;Unigene0009543;Unigene0013029;Unigene0013946;Unigene0013947;Unigene0013986;Unigene0015421;Unigene0015669;Unigene0015670;Unigene0016566;Unigene0017441;Unigene0017442;Unigene0019071;Unigene0019073;Unigene0019074;Unigene00…	K04854+K04526+K07187+K04851+K02649+K04849+K04696+K00873+K12406+K04694+K04440+K04344+K00922+K04852+K04850+K04371+K07595+K07594+K00844+K05032+K07296+K07593+K04527+K07203+K07209+K03156+K04695+K05004
Melanoma	268	ko05218	16	>Unigene0001375;>Unigene0001376;>Unigene0004274;>Unigene0011216;>Unigene0029429;>Unigene0046561;>Unigene0050569;>Unigene0053007;>Unigene0096030;>Unigene0101300;>Unigene0109030;>Unigene0118200;>Unigene0121904;>Unigene0133774;>Unigene0140527;>Unigene0149630;	Unigene0001375;Unigene0001376;Unigene0004201;Unigene0004274;Unigene0004464;Unigene0005156;Unigene0007120;Unigene0007922;Unigene0009860;Unigene0010411;Unigene0011216;Unigene0011702;Unigene0013986;Unigene0014940;Unigene0014941;Unigene0014942;Unigene0014943;Unigene0017456;Unigene0017457;Unigene0019554;Unigene0019556;Unigene0019587;Unigene0019923;Unigene0019924;Unigene0020724;Unigene0020763;Unigene00…	K05087+K07827+K04358+K02649+K02089+K04361+K06620+K04363+K04456+K00922+K04362+K08845+K04366+K05089+K04371+K01110+K04359+K09455+K05459+K06625+K06618+K02091+K06643+K04503+K05460+K04451+K04365+K04369+K05099+K09389+K05450+K05689+K04357+K04368+K02833
p53 signaling pathway	262	ko04115	7	>Unigene0000553;>Unigene0029429;>Unigene0086223;>Unigene0109030;>Unigene0114144;>Unigene0124980;>Unigene0128430;	Unigene0000553;Unigene0006569;Unigene0008581;Unigene0009022;Unigene0009147;Unigene0010411;Unigene0010701;Unigene0011680;Unigene0011713;Unigene0014729;Unigene0014730;Unigene0015145;Unigene0015711;Unigene0015842;Unigene0015843;Unigene0015844;Unigene0016357;Unigene0016477;Unigene0016478;Unigene0016479;Unigene0017264;Unigene0017576;Unigene0017578;Unigene0017579;Unigene0021397;Unigene0021398;Unigene00…	K10138+K10142+K10130+K07207+K05868+K02089+K04398+K06640+K10129+K10141+K10808+K10147+K04596+K10140+K04399+K04402+K02159+K04728+K01110+K06509+K10135+K10127+K05459+K06625+K02091+K06643+K02206+K10143+K04503+K10128+K10151+K10146+K02084+K04451+K10148+K06641+K04390+K10137+K04506+K10133+K06626+K10152+K02087+K02216+K10134+K10145+K08738+K03982+K10144+K02187+K10136+K04726
Aldosterone-regulated sodium reabsorption	168	ko04960	5	>Unigene0029429;>Unigene0065336;>Unigene0109030;>Unigene0114933;>Unigene0117043;	Unigene0004154;Unigene0004201;Unigene0005438;Unigene0007275;Unigene0007922;Unigene0013986;Unigene0015276;Unigene0018896;Unigene0018897;Unigene0018898;Unigene0018899;Unigene0018900;Unigene0018901;Unigene0018902;Unigene0018903;Unigene0019554;Unigene0019556;Unigene0019923;Unigene0019924;Unigene0020763;Unigene0020764;Unigene0021208;Unigene0023575;Unigene0023795;Unigene0024058;Unigene0024059;Unigene00…	K04526+K07827+K07187+K01539+K02649+K13305+K00922+K04371+K02677+K13302+K05459+K04995+K04527+K01540+K13358+K08555+K00071+K06276
