# Supplementary material for: Transcriptome Analysis of the Trachinotus ovatus: Identification of Reproduction, Growth and Immune-Related Genes and Microsatellite Markers
Source: PLoS One. 2014 Oct 10;9(10):e109419. doi: 10.1371/journal.pone.0109419 (PMC4193775; doi:10.1371/journal.pone.0109419)
Supplement: Table S7 — KEEG pathway analysis for immune response. (XLSX) [file pone.0109419.s008.xlsx]

## Sheet: Table S5
KEEG pathway analysis for immune response
#Pathway	Count (38172)	Pathway ID	N_T_G	Target_Genes	Genes	KOs
Pathways in cancer	1763	ko05200	13	>Unigene0016602;>Unigene0039482;>Unigene0050077;>Unigene0058819;>Unigene0090415;>Unigene0102043;>Unigene0105577;>Unigene0107873;>Unigene0123214;>Unigene0123488;>Unigene0128738;>Unigene0140013;>Unigene0145570;	Unigene0000001;Unigene0000398;Unigene0000505;Unigene0001323;Unigene0001375;Unigene0001376;Unigene0002847;Unigene0002972;Unigene0003044;Unigene0004201;Unigene0004274;Unigene0004464;Unigene0004695;Unigene0004782;Unigene0004945;Unigene0005156;Unigene0005348;Unigene0005490;Unigene0005491;Unigene0006056;Unigene0006057;Unigene0006058;Unigene0006481;Unigene0006523;Unigene0006876;Unigene0006989;Unigene00…	K06237+K04388+K00182+K05087+K06240+K06765+K06230+K07827+K04358+K11988+K09849+K08528+K04379+K08775+K06244+K06225+K00714+K00444+K00408+K04662+K04501+K08524+K02649+K05449+K04492+K02353+K04393+K08735+K04385+K03173+K05092+K05637+K02089+K08878+K04706+K06231+K04462+K06228+K08731+K10055+K04398+K04361+K06485+K04364+K01398+K08268+K04377+K04079+K04389+K01064+K04438+K05636+K08734+K06620+K05635+K06482+K13375+…
MAPK signaling pathway	1575	ko04010	10	>Unigene0014153;>Unigene0101958;>Unigene0105320;>Unigene0106000;>Unigene0117548;>Unigene0122301;>Unigene0128644;>Unigene0128759;>Unigene0146279;>Unigene0152676;	Unigene0000398;Unigene0002264;Unigene0002921;Unigene0003323;Unigene0003987;Unigene0004201;Unigene0004371;Unigene0004464;Unigene0004804;Unigene0005156;Unigene0005922;Unigene0005936;Unigene0006056;Unigene0006057;Unigene0006058;Unigene0006759;Unigene0006760;Unigene0007120;Unigene0008021;Unigene0008022;Unigene0008208;Unigene0008769;Unigene0008919;Unigene0008968;Unigene0009014;Unigene0009206;Unigene00…	K04388+K04854+K04355+K04459+K04853+K07827+K08053+K04358+K04356+K04851+K04379+K01047+K04431+K04439+K04849+K04393+K04861+K04858+K03173+K06855+K04857+K04864+K07830+K07829+K04444+K04443+K04468+K04462+K03283+K04380+K04361+K04364+K04377+K04860+K04389+K04438+K04387+K04428+K04441+K04859+K04856+K13375+K04467+K04436+K04454+K04372+K04434+K04350+K08052+K04410+K05093+K03099+K04440+K04363+K04863+K04345+K04461+…
Calcium signaling pathway	1313	ko04020	6	>Unigene0005276;>Unigene0007781;>Unigene0035470;>Unigene0045112;>Unigene0053699;>Unigene0067011;	Unigene0000368;Unigene0000448;Unigene0000478;Unigene0000519;Unigene0001199;Unigene0002264;Unigene0002860;Unigene0002943;Unigene0003059;Unigene0003278;Unigene0003960;Unigene0003987;Unigene0004574;Unigene0004653;Unigene0004698;Unigene0004871;Unigene0005013;Unigene0005276;Unigene0005394;Unigene0005630;Unigene0005870;Unigene0005936;Unigene0006317;Unigene0006349;Unigene0006759;Unigene0006760;Unigene00…	K13755+K05853+K05852+K04963+K04854+K04224+K08042+K08044+K04853+K04157+K05860+K08043+K04958+K00907+K04809+K05840+K04851+K04222+K04194+K04141+K05215+K05865+K05085+K04297+K05849+K04961+K04962+K04849+K04857+K05212+K04258+K05209+K04960+K04211+K05211+K05857+K04361+K05084+K07190+K05871+K08049+K04964+K05864+K06856+K04267+K04856+K00871+K05850+K04363+K04260+K08041+K05859+K05858+K04345+K06268+K04604+K04348+…
Focal adhesion	1211	ko04510	1	>Unigene0102043;	Unigene0000001;Unigene0001311;Unigene0001375;Unigene0001376;Unigene0001468;Unigene0001998;Unigene0002847;Unigene0003412;Unigene0004214;Unigene0004274;Unigene0004401;Unigene0004695;Unigene0004945;Unigene0005013;Unigene0005203;Unigene0005258;Unigene0005469;Unigene0005640;Unigene0006373;Unigene0006374;Unigene0006523;Unigene0006876;Unigene0007311;Unigene0007312;Unigene0007718;Unigene0007765;Unigene00…	K06237+K06236+K05087+K04659+K05699+K06240+K12757+K10351+K12758+K00907+K06589+K06244+K06238+K06270+K02649+K05449+K06279+K04393+K05732+K05637+K05760+K04361+K05700+K06485+K04364+K06251+K04438+K06278+K05636+K05635+K06271+K06583+K06482+K05692+K05725+K04410+K03099+K06243+K05448+K04440+K04363+K06275+K05703+K05704+K04456+K04513+K00922+K04514+K06493+K05717+K06272+K04366+K05730+K05096+K05097+K05089+K06588+…
Endocytosis	1119	ko04144	17	>Unigene0017325;>Unigene0017326;>Unigene0017351;>Unigene0020082;>Unigene0020084;>Unigene0063046;>Unigene0080927;>Unigene0080928;>Unigene0094512;>Unigene0094513;>Unigene0102043;>Unigene0109011;>Unigene0109304;>Unigene0111511;>Unigene0117306;>Unigene0123963;>Unigene0124813;	Unigene0000398;Unigene0001375;Unigene0001376;Unigene0003743;Unigene0003744;Unigene0003868;Unigene0003869;Unigene0004274;Unigene0004591;Unigene0005996;Unigene0007036;Unigene0008038;Unigene0008601;Unigene0008769;Unigene0008968;Unigene0009038;Unigene0009217;Unigene0009861;Unigene0009908;Unigene0010401;Unigene0010585;Unigene0011216;Unigene0011570;Unigene0011702;Unigene0011824;Unigene0011835;Unigene00…	K04388+K05087+K12488+K06751+K04141+K05085+K12471+K04439+K04393+K01528+K04644+K04180+K12494+K04678+K03283+K04361+K12484+K07897+K07904+K12486+K05084+K12186+K12472+K08291+K12199+K06278+K12200+K11248+K12491+K11247+K13305+K04645+K12188+K13375+K06069+K00910+K12490+K12474+K12196+K07892+K05093+K11824+K05050+K04175+K04363+K12489+K05704+K12495+K12493+K04707+K01115+K04513+K12470+K05069+K09526+K12479+K07891+…
Neuroactive ligand-receptor interaction	1049	ko04080	6	>Unigene0005276;>Unigene0007781;>Unigene0035470;>Unigene0045112;>Unigene0053699;>Unigene0067011;	Unigene0001058;Unigene0001486;Unigene0001948;Unigene0002442;Unigene0002784;Unigene0002791;Unigene0002860;Unigene0002884;Unigene0003354;Unigene0003376;Unigene0003909;Unigene0004097;Unigene0004574;Unigene0004937;Unigene0005233;Unigene0005276;Unigene0005302;Unigene0005314;Unigene0005337;Unigene0005556;Unigene0005630;Unigene0005870;Unigene0005906;Unigene0006112;Unigene0006113;Unigene0006114;Unigene00…	K04804+K04153+K04280+K04814+K05193+K04228+K04224+K04585+K04234+K05247+K04306+K05252+K04157+K04200+K05205+K04809+K04151+K05195+K04263+K01319+K05840+K04582+K04138+K04140+K04139+K04222+K04576+K04294+K04194+K04141+K05215+K05204+K04145+K04297+K05200+K04230+K04815+K04805+K04608+K04616+K05547+K05176+K05179+K08375+K04810+K04808+K05212+K04258+K05210+K05194+K05209+K04211+K04307+K05211+K04271+K04299+K08388+…
Axon guidance	889	ko04360	1	>Unigene0102043;	Unigene0000313;Unigene0002972;Unigene0003236;Unigene0004201;Unigene0004958;Unigene0005119;Unigene0005142;Unigene0005217;Unigene0005218;Unigene0005381;Unigene0005382;Unigene0005441;Unigene0005509;Unigene0005766;Unigene0005938;Unigene0006471;Unigene0006472;Unigene0006537;Unigene0006779;Unigene0007014;Unigene0007149;Unigene0007150;Unigene0007191;Unigene0007192;Unigene0007193;Unigene0007369;Unigene00…	K05109+K05106+K06765+K05108+K07827+K07521+K05462+K06850+K04446+K06820+K06840+K05113+K06839+K07523+K06521+K07527+K06821+K07524+K05111+K06838+K04393+K07520+K06754+K05463+K07522+K05112+K07529+K07532+K06842+K07525+K07526+K04630+K05725+K04410+K05703+K07528+K06268+K04348+K04513+K04514+K05743+K05104+K05105+K06550+K06529+K04371+K05736+K07531+K06724+K05107+K06753+K06845+K05765+K05102+K07530+K04189+K05735+…
Tuberculosis	850	ko05152	41	>Unigene0010488;>Unigene0016497;>Unigene0022787;>Unigene0022788;>Unigene0027280;>Unigene0034168;>Unigene0042665;>Unigene0048335;>Unigene0051616;>Unigene0066143;>Unigene0069448;>Unigene0078461;>Unigene0078462;>Unigene0078463;>Unigene0078464;>Unigene0078465;>Unigene0078467;>Unigene0090429;>Unigene0090430;>Unigene0095727;>Unigene0096404;>Unigene0104518;>Unigene0106976;>Unigene0106979;>Unigene0115959…	Unigene0000421;Unigene0002907;Unigene0004127;Unigene0008002;Unigene0010488;Unigene0010674;Unigene0010742;Unigene0011113;Unigene0011114;Unigene0011680;Unigene0011737;Unigene0011738;Unigene0011835;Unigene0012354;Unigene0012692;Unigene0013516;Unigene0014005;Unigene0014652;Unigene0015074;Unigene0015266;Unigene0015267;Unigene0015268;Unigene0015332;Unigene0015385;Unigene0015407;Unigene0015727;Unigene00…	K06752+K12794+K06563+K06560+K05443+K05870+K03990+K02154+K04398+K07897+K10059+K06464+K07532+K06856+K04441+K04447+K08063+K13375+K03661+K14958+K08539+K04440+K04399+K05704+K06268+K04348+K04456+K04513+K04366+K11220+K04515+K02159+K05414+K01379+K03662+K04371+K04400+K03158+K04498+K05135+K05855+K05425+K10074+K01368+K06461+K13376+K10048+K10159+K04735+K12478+K07983+K02183+K05133+K04043+K02084+K08062+K04730+…
Chemokine signaling pathway	778	ko04062	16	>Unigene0016497;>Unigene0017325;>Unigene0017326;>Unigene0017351;>Unigene0058819;>Unigene0063046;>Unigene0104518;>Unigene0105577;>Unigene0111511;>Unigene0117306;>Unigene0120130;>Unigene0123488;>Unigene0123963;>Unigene0124813;>Unigene0128738;>Unigene0140013;	Unigene0001781;Unigene0002943;Unigene0003059;Unigene0003278;Unigene0004201;Unigene0004698;Unigene0007922;Unigene0008019;Unigene0008592;Unigene0008593;Unigene0008769;Unigene0008968;Unigene0009665;Unigene0009861;Unigene0009899;Unigene0011115;Unigene0011401;Unigene0011957;Unigene0012340;Unigene0012562;Unigene0012694;Unigene0012695;Unigene0013824;Unigene0013825;Unigene0013908;Unigene0013957;Unigene00…	K04181+K08042+K08044+K07827+K08043+K02649+K06279+K07363+K04439+K04393+K04180+K04177+K04176+K05731+K08046+K05760+K04364+K05871+K08291+K04438+K04193+K08049+K05747+K04447+K04467+K00910+K04630+K05725+K03099+K04188+K05050+K04182+K04175+K08041+K12366+K05858+K04345+K05507+K04456+K04513+K00922+K04514+K04692+K12367+K04366+K11220+K05730+K08891+K08047+K11224+K12361+K09408+K04543+K04371+K05854+K04237+K08048+…
Purine metabolism	776	ko00230	6	>Unigene0065181;>Unigene0065182;>Unigene0065183;>Unigene0078941;>Unigene0116897;>Unigene0128264;	Unigene0000368;Unigene0000687;Unigene0002173;Unigene0002943;Unigene0002965;Unigene0003059;Unigene0003218;Unigene0003230;Unigene0003278;Unigene0004195;Unigene0004394;Unigene0004698;Unigene0004857;Unigene0005522;Unigene0005523;Unigene0005638;Unigene0005639;Unigene0005745;Unigene0005754;Unigene0006118;Unigene0006845;Unigene0006846;Unigene0007550;Unigene0007990;Unigene0008765;Unigene0009343;Unigene00…	K13755+K01120+K01081+K08042+K08718+K13296+K08044+K03002+K01939+K08043+K01466+K13761+K03006+K03015+K01490+K01477+K00940+K08046+K00904+K00893+K13811+K03024+K01487+K08049+K00760+K01239+K12323+K12319+K00873+K12406+K10808+K00088+K03018+K00942+K08041+K12324+K00764+K01514+K12318+K12305+K00364+K08047+K01952+K12304+K02999+K01835+K08048+K12320+K13760+K13298+K03506+K08045+K03023+K03021+K03000+K10807+K03010+…
Wnt signaling pathway	770	ko04310	2	>Unigene0050077;>Unigene0090415;	Unigene0000505;Unigene0001323;Unigene0002714;Unigene0004359;Unigene0004360;Unigene0004632;Unigene0004841;Unigene0005217;Unigene0005218;Unigene0005872;Unigene0007133;Unigene0007221;Unigene0007222;Unigene0007365;Unigene0007366;Unigene0007367;Unigene0007571;Unigene0007643;Unigene0008131;Unigene0008471;Unigene0008990;Unigene0009232;Unigene0009778;Unigene0010452;Unigene0010711;Unigene0010945;Unigene00…	K00182+K03213+K02176+K04499+K04446+K08960+K04510+K00714+K00444+K00408+K04501+K04492+K02353+K04385+K04502+K04468+K04377+K01064+K04511+K04382+K04440+K04491+K05858+K04345+K06268+K04348+K04512+K04513+K04497+K11584+K04514+K04496+K04515+K02677+K04505+K03068+K03362+K03345+K04498+K04500+K02085+K04494+K02432+K02620+K04503+K00312+K02157+K00572+K03344+K02375+K01558+K04427+K01357+K10151+K02105+K03097+K03115+…
Adherens junction	757	ko04520	3	>Unigene0050077;>Unigene0090415;>Unigene0102043;	Unigene0000398;Unigene0001375;Unigene0001376;Unigene0001998;Unigene0002989;Unigene0004274;Unigene0006373;Unigene0006374;Unigene0007643;Unigene0007963;Unigene0007964;Unigene0008131;Unigene0008428;Unigene0008968;Unigene0009497;Unigene0010711;Unigene0011216;Unigene0011685;Unigene0011702;Unigene0011793;Unigene0011794;Unigene0014415;Unigene0014494;Unigene0014698;Unigene0014814;Unigene0014815;Unigene00…	K04388+K05087+K05699+K05748+K04501+K06085+K04492+K06081+K04393+K04468+K04361+K05700+K05747+K06084+K05692+K06086+K05690+K05627+K04491+K05703+K05705+K05704+K05693+K04513+K06083+K05695+K04362+K05702+K05694+K05753+K04371+K06082+K04498+K05701+K04500+K05698+K06531+K04237+K02620+K06592+K04674+K04427+K02105+K05706+K04527+K03097+K03115+K05696+K07861+K04392+K06593+K05691+K05099+K04490+K05689+K07860+K05083+…
Osteoclast differentiation	711	ko04380	83	>Unigene0020443;>Unigene0020444;>Unigene0020452;>Unigene0020455;>Unigene0020456;>Unigene0020457;>Unigene0020460;>Unigene0020461;>Unigene0020462;>Unigene0027280;>Unigene0039926;>Unigene0039941;>Unigene0041116;>Unigene0041337;>Unigene0042688;>Unigene0048335;>Unigene0075856;>Unigene0075857;>Unigene0075858;>Unigene0075859;>Unigene0075860;>Unigene0075863;>Unigene0075864;>Unigene0075865;>Unigene0075867…	Unigene0000398;Unigene0003651;Unigene0003652;Unigene0006056;Unigene0006057;Unigene0006058;Unigene0006453;Unigene0007922;Unigene0008208;Unigene0008592;Unigene0009384;Unigene0010452;Unigene0010674;Unigene0011957;Unigene0012471;Unigene0012496;Unigene0012660;Unigene0013946;Unigene0013947;Unigene0013986;Unigene0014415;Unigene0015266;Unigene0015267;Unigene0015268;Unigene0015727;Unigene0015790;Unigene00…	K04388+K08010+K04379+K04576+K02649+K04431+K07364+K03173+K04502+K09030+K05870+K04364+K07370+K04696+K04441+K13375+K04467+K01371+K04694+K08601+K04440+K05703+K04348+K04456+K00922+K07361+K06493+K05131+K11220+K05090+K04371+K03158+K04466+K05130+K05855+K09455+K14380+K04469+K13376+K05869+K04735+K07371+K07210+K05147+K04674+K05133+K05856+K04404+K04427+K14381+K11219+K09253+K09029+K08530+K11221+K04734+K04392+…
Cytokine-cytokine receptor interaction	706	ko04060	244	>Unigene0008701;>Unigene0010488;>Unigene0011653;>Unigene0014047;>Unigene0014153;>Unigene0014659;>Unigene0016602;>Unigene0017325;>Unigene0017326;>Unigene0017351;>Unigene0018912;>Unigene0018913;>Unigene0018914;>Unigene0020082;>Unigene0020084;>Unigene0020443;>Unigene0020444;>Unigene0020452;>Unigene0020455;>Unigene0020456;>Unigene0020457;>Unigene0020460;>Unigene0020461;>Unigene0020462;>Unigene0022787…	Unigene0000398;Unigene0001781;Unigene0002861;Unigene0002929;Unigene0005080;Unigene0005222;Unigene0005223;Unigene0007621;Unigene0007622;Unigene0007951;Unigene0008701;Unigene0009385;Unigene0009387;Unigene0009675;Unigene0009861;Unigene0010488;Unigene0011017;Unigene0011653;Unigene0011702;Unigene0013165;Unigene0013908;Unigene0014047;Unigene0014153;Unigene0014415;Unigene0014659;Unigene0014758;Unigene00…	K04388+K04181+K04663+K13578+K04662+K05449+K05164+K03160+K05092+K04671+K04180+K04177+K04176+K05443+K05476+K05060+K04361+K04389+K04193+K05075+K04387+K05067+K05477+K05157+K13375+K05057+K04670+K05061+K05448+K04188+K05050+K04182+K04175+K04363+K04675+K05507+K05069+K05131+K05136+K04722+K05058+K05090+K05096+K05091+K05097+K05089+K05414+K05441+K05072+K05082+K05079+K05076+K03158+K04359+K05152+K05130+K05135+…
Hepatitis C	691	ko05160	119	>Unigene0010581;>Unigene0010582;>Unigene0020443;>Unigene0020444;>Unigene0020452;>Unigene0020455;>Unigene0020456;>Unigene0020457;>Unigene0020460;>Unigene0020461;>Unigene0020462;>Unigene0021859;>Unigene0021860;>Unigene0021863;>Unigene0021864;>Unigene0022787;>Unigene0022788;>Unigene0027280;>Unigene0039926;>Unigene0039941;>Unigene0041088;>Unigene0041116;>Unigene0041337;>Unigene0041477;>Unigene0042665…	Unigene0001930;Unigene0004201;Unigene0004935;Unigene0007891;Unigene0007922;Unigene0009384;Unigene0010581;Unigene0010582;Unigene0010930;Unigene0010934;Unigene0011702;Unigene0011840;Unigene0011957;Unigene0013946;Unigene0013947;Unigene0013986;Unigene0014138;Unigene0014284;Unigene0015120;Unigene0015167;Unigene0015168;Unigene0015266;Unigene0015267;Unigene0015268;Unigene0015790;Unigene0016259;Unigene00…	K06087+K07827+K08524+K02649+K03173+K09447+K04706+K06088+K04361+K04354+K04364+K04696+K07294+K08860+K05410+K04441+K04467+K04382+K03099+K04440+K04456+K00922+K04692+K05131+K02861+K08845+K04366+K11220+K05414+K04371+K03158+K05130+K06625+K04735+K07210+K03250+K10030+K11219+K12648+K12473+K03174+K13885+K04451+K04365+K07211+K11221+K04734+K05411+K02580+K07209+K03156+K03175+K08536+K03083+K05842+K11217+K06508+…
Neurotrophin signaling pathway	688	ko04722	7	>Unigene0050214;>Unigene0066143;>Unigene0112825;>Unigene0115959;>Unigene0123704;>Unigene0129048;>Unigene0137583;	Unigene0002921;Unigene0004201;Unigene0004804;Unigene0005438;Unigene0007922;Unigene0008019;Unigene0008208;Unigene0008968;Unigene0009665;Unigene0010650;Unigene0011957;Unigene0013165;Unigene0013824;Unigene0013825;Unigene0013986;Unigene0015266;Unigene0015267;Unigene0015268;Unigene0017016;Unigene0017017;Unigene0017441;Unigene0017442;Unigene0017813;Unigene0018204;Unigene0018394;Unigene0019190;Unigene00…	K04355+K07827+K04356+K07187+K02649+K06279+K04431+K04393+K04443+K04364+K04389+K04438+K04441+K03099+K04440+K05859+K09593+K05101+K04456+K04513+K00922+K04366+K04515+K02159+K09408+K04371+K04421+K04522+K04505+K12462+K12460+K04373+K07293+K06630+K05869+K06277+K04735+K04445+K02183+K02582+K03176+K04732+K12388+K12461+K04730+K04451+K04426+K04365+K12459+K05728+K04734+K08846+K04392+K02580+K07209+K10148+K07193+…
Measles	663	ko05162	148	>Unigene0010581;>Unigene0010582;>Unigene0016497;>Unigene0020082;>Unigene0020084;>Unigene0020443;>Unigene0020444;>Unigene0020452;>Unigene0020455;>Unigene0020456;>Unigene0020457;>Unigene0020460;>Unigene0020461;>Unigene0020462;>Unigene0021859;>Unigene0021860;>Unigene0021863;>Unigene0021864;>Unigene0022787;>Unigene0022788;>Unigene0023951;>Unigene0023952;>Unigene0023953;>Unigene0023954;>Unigene0023955…	Unigene0004127;Unigene0006349;Unigene0007922;Unigene0010411;Unigene0010581;Unigene0010582;Unigene0010759;Unigene0011453;Unigene0011570;Unigene0013165;Unigene0013986;Unigene0014284;Unigene0015074;Unigene0015120;Unigene0015385;Unigene0015790;Unigene0016497;Unigene0017704;Unigene0017705;Unigene0017706;Unigene0017708;Unigene0017709;Unigene0017710;Unigene0017711;Unigene0017712;Unigene0017714;Unigene00…	K06563+K04222+K02649+K02089+K09447+K05763+K03283+K04389+K08860+K06856+K05410+K04447+K04467+K05703+K04456+K00922+K05069+K04692+K05131+K10785+K04722+K12968+K11220+K11224+K11223+K05414+K05404+K14754+K05130+K05425+K02091+K02206+K04721+K10159+K04735+K04503+K07990+K05133+K04404+K04427+K10151+K11219+K12648+K03097+K04730+K07899+K03115+K04007+K04451+K07211+K11221+K04734+K05411+K02580+K11859+K10148+K04390+…
Alzheimer's disease	648	ko05010	1	>Unigene0146279;	Unigene0000448;Unigene0000519;Unigene0001199;Unigene0002876;Unigene0003960;Unigene0003987;Unigene0004871;Unigene0005394;Unigene0005936;Unigene0006317;Unigene0006759;Unigene0006760;Unigene0008672;Unigene0009558;Unigene0009559;Unigene0009932;Unigene0010303;Unigene0010324;Unigene0010325;Unigene0010423;Unigene0010598;Unigene0010600;Unigene0010900;Unigene0010919;Unigene0010920;Unigene0010921;Unigene00…	K05853+K04963+K11716+K04853+K04958+K04851+K02131+K04857+K05212+K02132+K05210+K02128+K05209+K04960+K05211+K02126+K03936+K04380+K04398+K01367+K03948+K06059+K04399+K04397+K05858+K06268+K04348+K02271+K05208+K02261+K02256+K04850+K04959+K00412+K03935+K00236+K04520+K04371+K04522+K04505+K04634+K01408+K03158+K03940+K02133+K02262+K04550+K08852+K03942+K03853+K03934+K02183+K00134+K01059+K01389+K00415+K02084+…
T cell receptor signaling pathway	608	ko04660	3	>Unigene0010488;>Unigene0133365;>Unigene0146262;	Unigene0003402;Unigene0004201;Unigene0005217;Unigene0005218;Unigene0006056;Unigene0006057;Unigene0006058;Unigene0007922;Unigene0008208;Unigene0008592;Unigene0008593;Unigene0008968;Unigene0009593;Unigene0010411;Unigene0010488;Unigene0011957;Unigene0012660;Unigene0013867;Unigene0013986;Unigene0015266;Unigene0015267;Unigene0015268;Unigene0015283;Unigene0015790;Unigene0016668;Unigene0016937;Unigene00…	K06459+K07827+K04446+K04379+K02649+K04431+K07363+K07364+K04393+K07365+K02089+K05443+K04364+K06454+K04441+K07360+K04467+K04350+K04410+K03099+K05703+K04707+K06268+K04348+K12076+K06478+K04456+K04513+K00922+K07361+K10785+K04366+K05730+K04371+K05736+K04466+K04735+K07210+K05735+K05856+K04427+K07367+K07369+K04409+K04415+K04734+K05733+K02580+K07209+K07366+K03156+K04369+K03161+K04448+K07368+K03083+K06458+…
Jak-STAT signaling pathway	607	ko04630	196	>Unigene0008246;>Unigene0010488;>Unigene0011653;>Unigene0014047;>Unigene0014659;>Unigene0016497;>Unigene0016602;>Unigene0020082;>Unigene0020084;>Unigene0020443;>Unigene0020444;>Unigene0020452;>Unigene0020455;>Unigene0020456;>Unigene0020457;>Unigene0020460;>Unigene0020461;>Unigene0020462;>Unigene0022787;>Unigene0022788;>Unigene0023600;>Unigene0024859;>Unigene0024860;>Unigene0027280;>Unigene0027877…	Unigene0007922;Unigene0008246;Unigene0009759;Unigene0010488;Unigene0010930;Unigene0011653;Unigene0011957;Unigene0012352;Unigene0013946;Unigene0013947;Unigene0013986;Unigene0014047;Unigene0014659;Unigene0015385;Unigene0016115;Unigene0016497;Unigene0016566;Unigene0016602;Unigene0017016;Unigene0017017;Unigene0018394;Unigene0018424;Unigene0018426;Unigene0019587;Unigene0019923;Unigene0019924;Unigene00…	K02649+K05077+K04703+K05443+K04706+K05060+K04364+K04377+K04696+K05075+K05067+K04447+K05057+K04694+K05061+K03099+K04707+K04456+K00922+K05069+K04692+K05131+K05136+K05058+K11220+K11224+K11223+K11222+K05414+K05441+K05072+K05082+K05079+K05076+K04498+K05130+K05135+K07293+K05064+K05425+K00431+K04701+K04503+K05421+K05133+K04699+K05081+K10151+K11219+K05437+K04570+K04702+K05055+K11221+K05139+K05080+K04704+…
Spliceosome	601	ko03040	3	>Unigene0040067;>Unigene0131170;>Unigene0138352;	Unigene0004783;Unigene0004795;Unigene0007724;Unigene0010446;Unigene0010447;Unigene0010448;Unigene0010983;Unigene0011570;Unigene0012132;Unigene0012661;Unigene0013996;Unigene0014077;Unigene0014078;Unigene0014079;Unigene0014128;Unigene0014129;Unigene0014201;Unigene0014202;Unigene0014203;Unigene0014204;Unigene0014205;Unigene0014218;Unigene0014325;Unigene0014326;Unigene0014327;Unigene0014328;Unigene00…	K12880+K12811+K12822+K12897+K12831+K03283+K12884+K12882+K12866+K12838+K12893+K12896+K12886+K12887+K11093+K12862+K12875+K12828+K12890+K12858+K12888+K11094+K12815+K12850+K12900+K12879+K12818+K12847+K12891+K12860+K12892+K11984+K12741+K12823+K12859+K12841+K12839+K12842+K12825+K12626+K12846+K12821+K12627+K12824+K12836+K12869+K12830+K12871+K12812+K12820+K12840+K12885+K11091+K12874+K12832+K06063+K12662+…
Protein processing in endoplasmic reticulum	599	ko04141	24	>Unigene0021859;>Unigene0021860;>Unigene0021863;>Unigene0021864;>Unigene0041088;>Unigene0041477;>Unigene0082705;>Unigene0082707;>Unigene0091854;>Unigene0095316;>Unigene0095317;>Unigene0110626;>Unigene0114112;>Unigene0115971;>Unigene0123786;>Unigene0126160;>Unigene0136303;>Unigene0138809;>Unigene0138962;>Unigene0145715;>Unigene0147269;>Unigene0148957;>Unigene0149754;>Unigene0151143;	Unigene0005830;Unigene0008208;Unigene0009058;Unigene0009384;Unigene0011570;Unigene0012445;Unigene0012462;Unigene0012463;Unigene0012464;Unigene0012467;Unigene0012468;Unigene0012469;Unigene0012614;Unigene0014284;Unigene0015007;Unigene0015133;Unigene0015183;Unigene0015184;Unigene0015747;Unigene0015753;Unigene0016085;Unigene0016183;Unigene0016184;Unigene0016389;Unigene0016695;Unigene0016696;Unigene00…	K09503+K04431+K14007+K03173+K03283+K09518+K07151+K04079+K09561+K08860+K10578+K01367+K11718+K14001+K09502+K10086+K10839+K09525+K10099+K10636+K04440+K14015+K10575+K10976+K01230+K14005+K04452+K10601+K02159+K14016+K01228+K08057+K08653+K14026+K09507+K10088+K09486+K09542+K06689+K14010+K10597+K08852+K03853+K13989+K09027+K09490+K13525+K14020+K09580+K11863+K04556+K09523+K09485+K08054+K04426+K14011+K09521+…
Toxoplasmosis	573	ko05145	29	>Unigene0010488;>Unigene0016497;>Unigene0027280;>Unigene0034168;>Unigene0048335;>Unigene0066143;>Unigene0078461;>Unigene0078462;>Unigene0078463;>Unigene0078464;>Unigene0078465;>Unigene0078467;>Unigene0096404;>Unigene0104518;>Unigene0106976;>Unigene0106979;>Unigene0115959;>Unigene0120130;>Unigene0120977;>Unigene0120978;>Unigene0123704;>Unigene0123929;>Unigene0126984;>Unigene0129048;>Unigene0133365…	Unigene0000421;Unigene0002847;Unigene0004945;Unigene0006523;Unigene0006876;Unigene0007922;Unigene0008021;Unigene0008022;Unigene0009385;Unigene0009861;Unigene0010390;Unigene0010488;Unigene0011570;Unigene0011680;Unigene0011851;Unigene0012692;Unigene0013613;Unigene0013986;Unigene0014112;Unigene0014951;Unigene0015266;Unigene0015267;Unigene0015268;Unigene0015385;Unigene0015727;Unigene0015790;Unigene00…	K06752+K06240+K06244+K02649+K01047+K03160+K04180+K05637+K05443+K03283+K04398+K06485+K05636+K05635+K04441+K04447+K13375+K04467+K00461+K04630+K04694+K06243+K04440+K04399+K04456+K00922+K04692+K11220+K04371+K03158+K05135+K05425+K06247+K13376+K10159+K04735+K07210+K05133+K06246+K04404+K04427+K11219+K04570+K12473+K04730+K04734+K02580+K07209+K04725+K03156+K04534+K03175+K13377+K03161+K04729+K05719+K04433+…
Natural killer cell mediated cytotoxicity	552	ko04650	83	>Unigene0020443;>Unigene0020444;>Unigene0020452;>Unigene0020455;>Unigene0020456;>Unigene0020457;>Unigene0020460;>Unigene0020461;>Unigene0020462;>Unigene0022787;>Unigene0022788;>Unigene0027280;>Unigene0039926;>Unigene0039941;>Unigene0041116;>Unigene0041337;>Unigene0042665;>Unigene0042688;>Unigene0048335;>Unigene0051616;>Unigene0075856;>Unigene0075857;>Unigene0075858;>Unigene0075859;>Unigene0075860…	Unigene0004201;Unigene0005217;Unigene0005218;Unigene0005996;Unigene0007922;Unigene0008019;Unigene0008033;Unigene0009665;Unigene0009908;Unigene0011688;Unigene0011689;Unigene0011957;Unigene0012562;Unigene0013165;Unigene0013986;Unigene0014005;Unigene0015074;Unigene0015283;Unigene0015737;Unigene0015739;Unigene0017016;Unigene0017017;Unigene0017704;Unigene0017705;Unigene0017706;Unigene0017708;Unigene00…	K07827+K04446+K06751+K02649+K06279+K01353+K07988+K04364+K05871+K04389+K06464+K06856+K07360+K03099+K05703+K05859+K06268+K04348+K00922+K07361+K05131+K04722+K08845+K04366+K05730+K05414+K04371+K07818+K02677+K05130+K05855+K07293+K05718+K06479+K04721+K07983+K07990+K05133+K05856+K04365+K04409+K07861+K04392+K03156+K04390+K04369+K05132+K04368+K07984+K07992+K07860+K02833+K04687+K05697+K06453+K07989+K02187+…
Amoebiasis	541	ko05146	21	>Unigene0010488;>Unigene0014153;>Unigene0034168;>Unigene0058819;>Unigene0096404;>Unigene0101958;>Unigene0105320;>Unigene0105577;>Unigene0106000;>Unigene0117548;>Unigene0122301;>Unigene0123488;>Unigene0128644;>Unigene0128738;>Unigene0128759;>Unigene0133365;>Unigene0134798;>Unigene0140013;>Unigene0146262;>Unigene0146279;>Unigene0152676;	Unigene0000001;Unigene0001311;Unigene0001998;Unigene0002847;Unigene0003412;Unigene0004695;Unigene0004945;Unigene0005203;Unigene0005258;Unigene0005469;Unigene0005556;Unigene0006373;Unigene0006374;Unigene0006523;Unigene0006876;Unigene0007311;Unigene0007312;Unigene0007922;Unigene0008014;Unigene0008754;Unigene0009058;Unigene0009342;Unigene0009530;Unigene0009896;Unigene0010361;Unigene0010390;Unigene00…	K06237+K06236+K05699+K06240+K01319+K06244+K02649+K10955+K05637+K05443+K03997+K05700+K07897+K06464+K05636+K04387+K05635+K06856+K13375+K05725+K01476+K06243+K08041+K05858+K04345+K00922+K05717+K02677+K04634+K04635+K13963+K05425+K06247+K06461+K13376+K10159+K04735+K04633+K06246+K10030+K04636+K07887+K04000+K02580+K03156+K13377+K04386+K04632+K07888+K07889+K06241+K04455+K04687+K04519+K02187+K03998+K03999
Melanogenesis	536	ko04916	2	>Unigene0050077;>Unigene0090415;	Unigene0000505;Unigene0001323;Unigene0002943;Unigene0003059;Unigene0003278;Unigene0004201;Unigene0004698;Unigene0007221;Unigene0007222;Unigene0007365;Unigene0007366;Unigene0007367;Unigene0007571;Unigene0008131;Unigene0008471;Unigene0010098;Unigene0010674;Unigene0011115;Unigene0012340;Unigene0013137;Unigene0013363;Unigene0013753;Unigene0014331;Unigene0016186;Unigene0016187;Unigene0016189;Unigene00…	K00182+K08042+K08044+K07827+K08043+K00714+K00444+K00408+K04492+K02353+K09048+K05870+K08046+K01064+K08049+K04630+K08041+K04491+K05858+K04345+K04366+K04515+K08047+K05091+K05228+K04371+K00505+K02677+K04634+K04498+K09455+K02432+K08048+K02620+K08045+K02183+K00312+K04198+K05461+K00572+K02375+K01558+K01357+K02105+K02842+K04199+K04534+K04369+K02354+K04632+K03083+K04490+K02329+K02376+K04368+K01384+K02833
Chagas disease (American trypanosomiasis)	490	ko05142	20	>Unigene0010488;>Unigene0034168;>Unigene0048335;>Unigene0058819;>Unigene0066143;>Unigene0096404;>Unigene0105577;>Unigene0115959;>Unigene0123488;>Unigene0123704;>Unigene0123929;>Unigene0128738;>Unigene0129048;>Unigene0133365;>Unigene0134798;>Unigene0137583;>Unigene0140013;>Unigene0146262;>Unigene0146279;>Unigene0146468;	Unigene0000398;Unigene0006056;Unigene0006057;Unigene0006058;Unigene0007922;Unigene0009049;Unigene0010488;Unigene0010742;Unigene0011680;Unigene0011840;Unigene0012660;Unigene0013165;Unigene0013986;Unigene0014415;Unigene0015266;Unigene0015267;Unigene0015268;Unigene0015332;Unigene0015727;Unigene0015790;Unigene0015944;Unigene0016186;Unigene0016187;Unigene0016189;Unigene0016259;Unigene0016260;Unigene00…	K04388+K04379+K02649+K01283+K05443+K03990+K04398+K04354+K04389+K04441+K13375+K04467+K04630+K04382+K04440+K08041+K05858+K04430+K04456+K00922+K10785+K08057+K04371+K04634+K04635+K03158+K03916+K04500+K05425+K13376+K03988+K10159+K04735+K07210+K04674+K04633+K05133+K10030+K04636+K04724+K04730+K04734+K02580+K07209+K03156+K04390+K04534+K03175+K13377+K10161+K04729+K04632+K04448+K02373+K03986+K03987+K05842+…
Renal cell carcinoma	488	ko05211	1	>Unigene0102043;	Unigene0004201;Unigene0007922;Unigene0007951;Unigene0008968;Unigene0011957;Unigene0012239;Unigene0013824;Unigene0013825;Unigene0013986;Unigene0015727;Unigene0016419;Unigene0016937;Unigene0016938;Unigene0016939;Unigene0016940;Unigene0016941;Unigene0017016;Unigene0017017;Unigene0017251;Unigene0017252;Unigene0017253;Unigene0017254;Unigene0017923;Unigene0018204;Unigene0018394;Unigene0019328;Unigene00…	K07827+K02649+K05449+K04393+K04364+K08268+K04438+K13375+K09594+K04410+K03099+K05448+K03870+K09593+K09095+K04456+K00922+K08845+K04366+K09097+K04371+K05736+K09592+K04498+K07293+K07299+K13376+K06277+K05460+K05735+K04365+K04409+K05733+K04392+K13377+K04369+K04353+K03871+K01679+K05099+K04448+K03873+K07836+K03872+K05734+K04368+K03868+K02833+K08774
Arrhythmogenic right ventricular cardiomyopathy (ARVC)	481	ko05412	2	>Unigene0050077;>Unigene0090415;	Unigene0001202;Unigene0001998;Unigene0003197;Unigene0003935;Unigene0003987;Unigene0005544;Unigene0005640;Unigene0005936;Unigene0006173;Unigene0006373;Unigene0006374;Unigene0006759;Unigene0006760;Unigene0007379;Unigene0008131;Unigene0008673;Unigene0009206;Unigene0009265;Unigene0009536;Unigene0009537;Unigene0009558;Unigene0009559;Unigene0010143;Unigene0011685;Unigene0011851;Unigene0012148;Unigene00…	K07610+K05699+K07601+K12563+K04853+K10381+K06589+K04851+K12564+K04492+K04962+K04861+K04858+K10366+K04857+K04864+K06485+K04860+K06583+K06482+K04859+K05692+K12566+K04491+K04863+K04865+K06493+K06588+K04873+K04850+K06736+K06476+K06584+K06480+K04868+K02620+K04871+K06481+K06487+K12641+K10056+K06587+K12642+K07597+K02105+K04872+K04862+K06591+K04866+K04870+K06586+K06484+K06483+K06265+K05691+K04869+K05719+…
Toll-like receptor signaling pathway	464	ko04620	103	>Unigene0010581;>Unigene0010582;>Unigene0020443;>Unigene0020444;>Unigene0020452;>Unigene0020455;>Unigene0020456;>Unigene0020457;>Unigene0020460;>Unigene0020461;>Unigene0020462;>Unigene0022787;>Unigene0022788;>Unigene0027280;>Unigene0034168;>Unigene0039926;>Unigene0039941;>Unigene0041116;>Unigene0041337;>Unigene0042665;>Unigene0042688;>Unigene0051616;>Unigene0058819;>Unigene0061769;>Unigene0066143…	Unigene0006056;Unigene0006057;Unigene0006058;Unigene0007922;Unigene0008208;Unigene0009385;Unigene0010581;Unigene0010582;Unigene0011680;Unigene0012660;Unigene0013986;Unigene0015120;Unigene0015266;Unigene0015267;Unigene0015268;Unigene0015790;Unigene0016199;Unigene0017441;Unigene0017442;Unigene0019480;Unigene0019537;Unigene0019538;Unigene0019540;Unigene0019541;Unigene0019542;Unigene0019587;Unigene00…	K04379+K02649+K04431+K03160+K09447+K04398+K05410+K04441+K04467+K01371+K04440+K04430+K04456+K00922+K05131+K02861+K11220+K05414+K05404+K04371+K05402+K05130+K05425+K10159+K04735+K07210+K10030+K04404+K04427+K10168+K03174+K04730+K05403+K07211+K04415+K04734+K05411+K04392+K02580+K07209+K03156+K09446+K03175+K04369+K10161+K05398+K04729+K04448+K02373+K05842+K04433+K05401+K04733+K05409+K04368+K12499+K04519+…
ABC transporters	452	ko02010	13	>Unigene0007826;>Unigene0022415;>Unigene0022416;>Unigene0022417;>Unigene0050583;>Unigene0075326;>Unigene0075328;>Unigene0083459;>Unigene0097933;>Unigene0099227;>Unigene0124387;>Unigene0127543;>Unigene0145874;	Unigene0000022;Unigene0003036;Unigene0003037;Unigene0006059;Unigene0007826;Unigene0008589;Unigene0008590;Unigene0008929;Unigene0009749;Unigene0009811;Unigene0009812;Unigene0009813;Unigene0009814;Unigene0012201;Unigene0012202;Unigene0012203;Unigene0012204;Unigene0012205;Unigene0012206;Unigene0012207;Unigene0012638;Unigene0012639;Unigene0013993;Unigene0016077;Unigene0016078;Unigene0017401;Unigene00…	K05641+K05665+K05644+K05669+K05672+K05671+K05668+K05675+K05674+K05673+K05033+K05667+K05679+K05681+K05642+K05678+K05032+K05661+K05680+K05031+K05684+K05654+K05656+K05643+K05676+K05666+K05657+K05653+K05655+K05662+K05658+K05659+K05648+K05664+K05683+K05677
Bacterial invasion of epithelial cells	440	ko05100	1	>Unigene0102043;	Unigene0002989;Unigene0003099;Unigene0006210;Unigene0007922;Unigene0008019;Unigene0008968;Unigene0009038;Unigene0009217;Unigene0009497;Unigene0009665;Unigene0009858;Unigene0011401;Unigene0011793;Unigene0011794;Unigene0013824;Unigene0013825;Unigene0013942;Unigene0013943;Unigene0013945;Unigene0013986;Unigene0014698;Unigene0015006;Unigene0015378;Unigene0016028;Unigene0016029;Unigene0016621;Unigene00…	K05748+K05755+K06106+K02649+K06279+K04393+K01528+K04644+K05760+K05700+K04438+K06278+K05747+K04645+K05692+K05725+K05704+K12366+K13728+K09593+K04707+K04513+K00922+K05717+K06272+K05753+K12958+K07863+K05726+K02105+K13708+K13738+K04392+K13744+K06484+K04646+K05691+K05099+K05758+K05756+K05719+K05757+K05754+K05689+K13736
Prostate cancer	432	ko05215	2	>Unigene0050077;>Unigene0090415;	Unigene0001375;Unigene0001376;Unigene0004154;Unigene0004201;Unigene0004274;Unigene0007922;Unigene0008131;Unigene0010098;Unigene0010674;Unigene0011216;Unigene0011702;Unigene0011957;Unigene0012467;Unigene0012468;Unigene0012469;Unigene0013986;Unigene0014940;Unigene0014941;Unigene0014942;Unigene0014943;Unigene0015790;Unigene0016958;Unigene0016959;Unigene0017016;Unigene0017017;Unigene0017456;Unigene00…	K05087+K04526+K07827+K05086+K02649+K04492+K09048+K05870+K04361+K04364+K04079+K06620+K04467+K05093+K03099+K04363+K04399+K04491+K04456+K09047+K00922+K04362+K08845+K04366+K05089+K04371+K01110+K04359+K04498+K05459+K06625+K07201+K02620+K06618+K06643+K02206+K04735+K07210+K04503+K08557+K02105+K12344+K04451+K04365+K07203+K04734+K02580+K07209+K09487+K04369+K09389+K03083+K06624+K05450+K06626+K04490+K06276+…
Epithelial cell signaling in Helicobacter pylori infection	418	ko05120	15	>Unigene0017325;>Unigene0017326;>Unigene0017351;>Unigene0058819;>Unigene0063046;>Unigene0081529;>Unigene0102043;>Unigene0105577;>Unigene0111511;>Unigene0117306;>Unigene0123488;>Unigene0123963;>Unigene0124813;>Unigene0128738;>Unigene0140013;	Unigene0008255;Unigene0008968;Unigene0011113;Unigene0011114;Unigene0011702;Unigene0014125;Unigene0014126;Unigene0015266;Unigene0015267;Unigene0015268;Unigene0015790;Unigene0015900;Unigene0016043;Unigene0016650;Unigene0016651;Unigene0016652;Unigene0016653;Unigene0016654;Unigene0016655;Unigene0016656;Unigene0017325;Unigene0017326;Unigene0017351;Unigene0017441;Unigene0017442;Unigene0017713;Unigene00…	K02148+K04393+K02154+K04361+K06089+K04441+K04467+K03661+K06059+K05050+K04175+K04440+K05704+K02147+K05859+K04430+K08727+K03662+K08523+K04466+K05701+K05854+K07293+K06786+K06735+K04735+K05737+K07210+K02145+K10030+K04409+K05728+K04734+K04392+K02580+K07209+K08114+K02144+K02150+K02153+K05099+K04448+K02149+K06704+K02152+K02155+K02146+K12499+K06785+K02187+K02151
TGF-beta signaling pathway	411	ko04350	1	>Unigene0146262;	Unigene0000398;Unigene0001468;Unigene0002009;Unigene0002351;Unigene0002861;Unigene0002929;Unigene0004897;Unigene0005080;Unigene0005222;Unigene0005223;Unigene0007621;Unigene0007622;Unigene0007643;Unigene0009675;Unigene0010585;Unigene0010743;Unigene0012352;Unigene0014415;Unigene0014494;Unigene0014751;Unigene0014752;Unigene0015473;Unigene0015727;Unigene0015806;Unigene0015807;Unigene0016259;Unigene00…	K04388+K04659+K04686+K04663+K04682+K13578+K04662+K04501+K04671+K04678+K04657+K04377+K04683+K13375+K04681+K04382+K04670+K04675+K04513+K04514+K04676+K04688+K04371+K04679+K04498+K04500+K04667+K04668+K13376+K04674+K04665+K04664+K04658+K04661+K04677+K04672+K04673+K04680+K03156+K13377+K13596+K03456+K03347+K03868+K04684+K04660+K04687+K03094
Glycerophospholipid metabolism	409	ko00564	1	>Unigene0146286;	Unigene0003105;Unigene0004254;Unigene0005572;Unigene0008021;Unigene0008022;Unigene0009618;Unigene0010769;Unigene0012222;Unigene0015754;Unigene0015904;Unigene0015906;Unigene0017677;Unigene0018870;Unigene0018871;Unigene0019127;Unigene0019479;Unigene0019518;Unigene0019519;Unigene0019520;Unigene0019726;Unigene0019729;Unigene0019731;Unigene0019732;Unigene0019733;Unigene0019734;Unigene0019735;Unigene00…	K01049+K13510+K13523+K01047+K00967+K00649+K08729+K01613+K00006+K13513+K13515+K01115+K14676+K00999+K13506+K00901+K00995+K01080+K00981+K00894+K00111+K13644+K14156+K14621+K08744+K00551+K13517+K00650+K13511+K00994+K00968+K00629+K00993+K13512+K08730+K06128+K00623+K13516+K06130+K06129+K13509+K13514+K01517+K06124
Apoptosis	397	ko04210	24	>Unigene0050214;>Unigene0066143;>Unigene0072722;>Unigene0072723;>Unigene0098897;>Unigene0101958;>Unigene0105320;>Unigene0107238;>Unigene0107239;>Unigene0107240;>Unigene0107241;>Unigene0107242;>Unigene0107243;>Unigene0112825;>Unigene0115959;>Unigene0117548;>Unigene0122301;>Unigene0123704;>Unigene0124927;>Unigene0129048;>Unigene0131095;>Unigene0137583;>Unigene0146279;>Unigene0152676;	Unigene0007922;Unigene0009384;Unigene0010884;Unigene0011680;Unigene0013165;Unigene0013986;Unigene0015183;Unigene0015184;Unigene0015790;Unigene0015994;Unigene0015995;Unigene0015996;Unigene0015997;Unigene0015998;Unigene0017576;Unigene0017578;Unigene0017579;Unigene0017805;Unigene0018208;Unigene0018892;Unigene0018893;Unigene0018894;Unigene0018895;Unigene0019033;Unigene0019034;Unigene0019480;Unigene00…	K02649+K03173+K02311+K04398+K04389+K01367+K04467+K04727+K04399+K04397+K04345+K06268+K04348+K01173+K04456+K00922+K04722+K02861+K02159+K04728+K04400+K03158+K04466+K03853+K04721+K04735+K07210+K02582+K03176+K04732+K04724+K04570+K02084+K04730+K04739+K04451+K04734+K04723+K02580+K07209+K04725+K03156+K04390+K04729+K04386+K02373+K04738+K04733+K04396+K08738+K02310+K04519+K02187+K02161+K03171+K04726
Adipocytokine signaling pathway	377	ko04920	3	>Unigene0016497;>Unigene0104518;>Unigene0120130;	Unigene0002838;Unigene0004440;Unigene0005438;Unigene0006559;Unigene0007891;Unigene0009384;Unigene0012652;Unigene0013946;Unigene0013947;Unigene0014138;Unigene0015076;Unigene0015077;Unigene0015385;Unigene0015790;Unigene0016301;Unigene0016497;Unigene0016510;Unigene0016511;Unigene0016596;Unigene0016597;Unigene0017086;Unigene0017157;Unigene0017158;Unigene0017159;Unigene0017441;Unigene0017442;Unigene00…	K07198+K01897+K07187+K08765+K08524+K03173+K07202+K04696+K07294+K07359+K04447+K04467+K07200+K15013+K08525+K04440+K01084+K07297+K04456+K04692+K05228+K03158+K07293+K07299+K05141+K04735+K07210+K07199+K07296+K06259+K07203+K04734+K02580+K07209+K03156+K05062+K08526+K01596+K05231+K05872+K07298+K05232+K03171
Protein digestion and absorption	368	ko04974	1	>Unigene0133383;	Unigene0000001;Unigene0001073;Unigene0001311;Unigene0002959;Unigene0003152;Unigene0003412;Unigene0003953;Unigene0004003;Unigene0004695;Unigene0005203;Unigene0005258;Unigene0005469;Unigene0007032;Unigene0007275;Unigene0007311;Unigene0007312;Unigene0007671;Unigene0007718;Unigene0008006;Unigene0008007;Unigene0008014;Unigene0008400;Unigene0008620;Unigene0008621;Unigene0008754;Unigene0009342;Unigene00…	K06237+K06823+K06236+K08133+K01395+K05334+K08132+K01539+K06238+K08606+K05849+K08135+K06002+K04916+K13867+K01300+K06519+K07603+K08131+K01312+K14206+K01346+K04926+K14208+K14211+K01389+K05612+K13781+K01278+K08779+K01540+K14210+K14209+K05616+K12040+K08187+K01298+K04945+K05006+K01345+K01285+K09708+K14207+K09632+K01291
Colorectal cancer	361	ko05210	2	>Unigene0050077;>Unigene0090415;	Unigene0000398;Unigene0002972;Unigene0004201;Unigene0006056;Unigene0006057;Unigene0006058;Unigene0007643;Unigene0007922;Unigene0008131;Unigene0009051;Unigene0009232;Unigene0009805;Unigene0011634;Unigene0011635;Unigene0012352;Unigene0012620;Unigene0012621;Unigene0012660;Unigene0013986;Unigene0014415;Unigene0014418;Unigene0014494;Unigene0015727;Unigene0017389;Unigene0017390;Unigene0017391;Unigene00…	K04388+K06765+K07827+K04379+K04501+K02649+K04492+K08735+K04385+K08731+K04377+K08734+K13375+K04440+K04399+K04491+K08737+K08733+K04456+K04513+K00922+K08845+K04366+K02159+K08732+K04371+K04500+K02085+K02620+K13376+K04503+K04674+K02157+K02105+K04451+K04365+K07861+K04392+K13377+K04448+K03083+K04490+K08736+K04368+K08738+K07860+K02187+K02161
Acute myeloid leukemia	358	ko05221	2	>Unigene0050077;>Unigene0090415;	Unigene0004201;Unigene0007922;Unigene0008131;Unigene0009387;Unigene0011672;Unigene0011957;Unigene0012352;Unigene0013986;Unigene0015790;Unigene0016859;Unigene0017016;Unigene0017017;Unigene0017601;Unigene0018394;Unigene0019480;Unigene0019554;Unigene0019556;Unigene0019587;Unigene0019923;Unigene0019924;Unigene0020418;Unigene0020424;Unigene0020425;Unigene0020763;Unigene0020764;Unigene0021206;Unigene00…	K07827+K02649+K04492+K05092+K10055+K04364+K04377+K04467+K03099+K04491+K04456+K00922+K04692+K08845+K04366+K05091+K11224+K11223+K04688+K04371+K08367+K02620+K04735+K07210+K04503+K10056+K10054+K04702+K04365+K07203+K02580+K10053+K07209+K09055+K09438+K04369+K07205+K08527+K04490+K04504+K04368+K02833
Pyrimidine metabolism	358	ko00240	6	>Unigene0065181;>Unigene0065182;>Unigene0065183;>Unigene0078941;>Unigene0116897;>Unigene0128264;	Unigene0002173;Unigene0003230;Unigene0004195;Unigene0004857;Unigene0005745;Unigene0005754;Unigene0007550;Unigene0007990;Unigene0008545;Unigene0008546;Unigene0009343;Unigene0009529;Unigene0009661;Unigene0010103;Unigene0010277;Unigene0010338;Unigene0010339;Unigene0011190;Unigene0011191;Unigene0012088;Unigene0012220;Unigene0014031;Unigene0014032;Unigene0015842;Unigene0015843;Unigene0015844;Unigene00…	K01081+K03002+K03006+K03015+K00940+K00758+K01520+K00893+K00876+K03024+K10808+K03018+K00943+K12305+K01493+K12304+K02999+K03506+K13421+K03023+K03021+K03000+K00857+K10807+K01489+K03010+K03025+K03783+K03016+K01431+K01937+K03005+K01464+K01510+K14721+K00757+K00384+K02328+K02327+K01511+K03019+K02685+K03027+K03014+K01518+K01519+K03022+K03026+K02325+K00207+K03504+K02324+K02320+K02326+K03009+K03013+K03020+…
RIG-I-like receptor signaling pathway	343	ko04622	28	>Unigene0010581;>Unigene0010582;>Unigene0022787;>Unigene0022788;>Unigene0034168;>Unigene0042665;>Unigene0051616;>Unigene0058819;>Unigene0061769;>Unigene0077137;>Unigene0090429;>Unigene0090430;>Unigene0096404;>Unigene0102937;>Unigene0105577;>Unigene0108792;>Unigene0108793;>Unigene0114771;>Unigene0122127;>Unigene0123488;>Unigene0128227;>Unigene0128738;>Unigene0131170;>Unigene0133383;>Unigene0134798…	Unigene0000427;Unigene0009384;Unigene0010581;Unigene0010582;Unigene0011680;Unigene0014478;Unigene0014632;Unigene0014633;Unigene0014634;Unigene0014959;Unigene0014960;Unigene0015120;Unigene0015266;Unigene0015267;Unigene0015268;Unigene0015790;Unigene0017232;Unigene0017233;Unigene0017441;Unigene0017442;Unigene0018434;Unigene0018435;Unigene0018436;Unigene0018437;Unigene0018438;Unigene0018439;Unigene00…	K10652+K03173+K09447+K04398+K12654+K11594+K12652+K05410+K04441+K04467+K08601+K04440+K12653+K12650+K12651+K02861+K12655+K05414+K05441+K04400+K05425+K04735+K07210+K10030+K04427+K12648+K03174+K09578+K07211+K04734+K05411+K02580+K07209+K03156+K03175+K12647+K02373+K08339+K12656+K00863+K12649+K03171
Glycerolipid metabolism	341	ko00561	1	>Unigene0146286;	Unigene0005572;Unigene0009800;Unigene0010431;Unigene0012612;Unigene0014756;Unigene0016708;Unigene0018870;Unigene0018871;Unigene0019256;Unigene0021018;Unigene0021019;Unigene0021020;Unigene0021021;Unigene0021025;Unigene0021029;Unigene0021101;Unigene0021102;Unigene0021327;Unigene0021328;Unigene0021512;Unigene0021513;Unigene0023056;Unigene0023057;Unigene0023058;Unigene0023059;Unigene0023060;Unigene00…	K13523+K14074+K14073+K00002+K01189+K00011+K13534+K13513+K00864+K13506+K00901+K01080+K11155+K11160+K00128+K00149+K01059+K13517+K01054+K01046+K00629+K14085+K12298+K00865+K13509+K00863+K09881
Peroxisome	337	ko04146	8	>Unigene0072581;>Unigene0072584;>Unigene0072586;>Unigene0072589;>Unigene0072595;>Unigene0144125;>Unigene0144127;>Unigene0144128;	Unigene0001492;Unigene0004440;Unigene0005064;Unigene0008435;Unigene0010769;Unigene0011751;Unigene0011752;Unigene0011753;Unigene0012176;Unigene0012177;Unigene0012305;Unigene0012644;Unigene0012666;Unigene0014226;Unigene0014834;Unigene0015301;Unigene0015733;Unigene0015734;Unigene0016077;Unigene0016078;Unigene0016301;Unigene0016507;Unigene0016508;Unigene0016509;Unigene0016563;Unigene0016564;Unigene00…	K08746+K01897+K01640+K00624+K00649+K12663+K07513+K13273+K11992+K00830+K13348+K08726+K13345+K05675+K13239+K11517+K13356+K13237+K13335+K00232+K13354+K00869+K03426+K13351+K05678+K00308+K13336+K13342+K00273+K07753+K00477+K00031+K12405+K01796+K13352+K00106+K00306+K12261+K13338+K05676+K06664+K13347+K03781+K13344+K13346+K11147+K13337+K00272+K11187+K04564+K00803+K07514+K13339+K13353+K08764+K04565+K13341+…
Hematopoietic cell lineage	301	ko04640	42	>Unigene0014153;>Unigene0014659;>Unigene0016602;>Unigene0023600;>Unigene0039482;>Unigene0065356;>Unigene0065357;>Unigene0066187;>Unigene0066188;>Unigene0066189;>Unigene0068636;>Unigene0068638;>Unigene0068642;>Unigene0068643;>Unigene0068644;>Unigene0068645;>Unigene0068646;>Unigene0078879;>Unigene0096779;>Unigene0098211;>Unigene0100918;>Unigene0101958;>Unigene0104155;>Unigene0105320;>Unigene0106000…	Unigene0003402;Unigene0004219;Unigene0004220;Unigene0004413;Unigene0009387;Unigene0009577;Unigene0010108;Unigene0011851;Unigene0013867;Unigene0014153;Unigene0014659;Unigene0015074;Unigene0015326;Unigene0016602;Unigene0020174;Unigene0020716;Unigene0021999;Unigene0022001;Unigene0022002;Unigene0022004;Unigene0022880;Unigene0022881;Unigene0022886;Unigene0023003;Unigene0023600;Unigene0023748;Unigene00…	K06459+K11140+K06460+K05092+K06467+K06485+K06454+K04387+K05067+K06856+K06482+K05061+K06493+K05090+K05091+K04006+K05072+K05079+K06476+K06480+K00977+K00431+K06461+K06481+K05461+K06474+K01389+K06263+K06854+K06259+K05437+K05055+K05071+K06503+K06484+K03156+K06483+K05056+K04008+K05073+K04386+K06473+K06458+K06261+K06455+K06498+K06457+K06256+K06260+K06449+K06262+K06451+K06452+K06450+K04519+K05417+K06468
NOD-like receptor signaling pathway	301	ko04621	10	>Unigene0058819;>Unigene0078829;>Unigene0078831;>Unigene0081529;>Unigene0105577;>Unigene0123488;>Unigene0128738;>Unigene0138247;>Unigene0140013;>Unigene0146279;	Unigene0002907;Unigene0006894;Unigene0008774;Unigene0011680;Unigene0012467;Unigene0012468;Unigene0012469;Unigene0014013;Unigene0014014;Unigene0014015;Unigene0015266;Unigene0015267;Unigene0015268;Unigene0015790;Unigene0017291;Unigene0017441;Unigene0017442;Unigene0019244;Unigene0019480;Unigene0020770;Unigene0021397;Unigene0021398;Unigene0022116;Unigene0023193;Unigene0023194;Unigene0023195;Unigene00…	K12794+K12799+K12806+K01370+K04398+K04079+K04441+K04467+K04440+K12804+K12800+K08727+K04371+K12798+K12803+K12796+K04735+K07210+K10030+K04404+K04427+K04734+K08846+K02580+K07209+K11859+K09487+K04725+K03156+K12793+K03175+K12795+K12792+K10165+K12499+K04519+K04403
PPAR signaling pathway	297	ko03320	3	>Unigene0012396;>Unigene0063625;>Unigene0145644;	Unigene0001492;Unigene0004440;Unigene0006559;Unigene0006629;Unigene0007058;Unigene0007891;Unigene0011975;Unigene0011976;Unigene0012176;Unigene0012177;Unigene0012396;Unigene0014138;Unigene0015252;Unigene0016276;Unigene0016301;Unigene0016305;Unigene0016306;Unigene0016307;Unigene0016596;Unigene0016597;Unigene0017086;Unigene0017157;Unigene0017158;Unigene0017159;Unigene0019256;Unigene0020025;Unigene00…	K08746+K01897+K08765+K08751+K08771+K08524+K08770+K07513+K07294+K08766+K06086+K15013+K08525+K00864+K08749+K06272+K00232+K08745+K08755+K00488+K01059+K00507+K07296+K08767+K06259+K08530+K08536+K00489+K08756+K08526+K00255+K01596+K08752+K07514+K08761+K08750+K06276+K08764+K07431+K00249+K04504+K08762+K10226
Shigellosis	296	ko05131	6	>Unigene0058819;>Unigene0081529;>Unigene0105577;>Unigene0123488;>Unigene0128738;>Unigene0140013;	Unigene0002989;Unigene0003099;Unigene0006210;Unigene0008968;Unigene0009497;Unigene0009858;Unigene0011793;Unigene0011794;Unigene0013824;Unigene0013825;Unigene0014698;Unigene0015006;Unigene0015266;Unigene0015267;Unigene0015268;Unigene0015790;Unigene0016028;Unigene0016029;Unigene0016764;Unigene0017441;Unigene0017442;Unigene0017725;Unigene0017726;Unigene0017965;Unigene0017966;Unigene0019480;Unigene00…	K05748+K05755+K06106+K04393+K05700+K04438+K05747+K04441+K04467+K05692+K04440+K12366+K13728+K04514+K05759+K08727+K05753+K04371+K03362+K07863+K04735+K07210+K10030+K12836+K13708+K05740+K05728+K04734+K08846+K04392+K02580+K07209+K06484+K05758+K05756+K05719+K05757+K05754+K08339+K10165+K06619+K06256
Systemic lupus erythematosus	294	ko05322	3	>Unigene0010488;>Unigene0133365;>Unigene0146262;	Unigene0000421;Unigene0001998;Unigene0005556;Unigene0006373;Unigene0006374;Unigene0009385;Unigene0010324;Unigene0010325;Unigene0010488;Unigene0010598;Unigene0010742;Unigene0011059;Unigene0011060;Unigene0011685;Unigene0012692;Unigene0014425;Unigene0015074;Unigene0015332;Unigene0015944;Unigene0016137;Unigene0017439;Unigene0017555;Unigene0017556;Unigene0017557;Unigene0017558;Unigene0018115;Unigene00…	K06752+K05699+K01319+K03160+K05210+K05443+K05209+K03990+K03997+K11251+K06856+K03989+K11253+K01332+K11252+K10785+K03994+K01330+K03988+K03996+K10651+K11090+K11254+K11089+K03995+K04000+K03156+K03161+K01331+K03986+K03987+K11086+K11087+K06498+K11088+K04687+K05412+K05413+K03998+K03999
Leishmaniasis	287	ko05140	18	>Unigene0010488;>Unigene0016497;>Unigene0034168;>Unigene0048335;>Unigene0066143;>Unigene0096404;>Unigene0104518;>Unigene0115959;>Unigene0120130;>Unigene0123704;>Unigene0123929;>Unigene0129048;>Unigene0133365;>Unigene0134798;>Unigene0137583;>Unigene0146262;>Unigene0146279;>Unigene0146468;	Unigene0000421;Unigene0003651;Unigene0003652;Unigene0006056;Unigene0006057;Unigene0006058;Unigene0010488;Unigene0010742;Unigene0012660;Unigene0012692;Unigene0014005;Unigene0015074;Unigene0015266;Unigene0015267;Unigene0015268;Unigene0015332;Unigene0015385;Unigene0015727;Unigene0015944;Unigene0016497;Unigene0017439;Unigene0019437;Unigene0019438;Unigene0019439;Unigene0019440;Unigene0019441;Unigene00…	K06752+K08010+K04379+K05443+K03990+K06464+K06856+K04441+K04447+K13375+K11220+K04371+K05425+K06461+K13376+K10159+K04735+K05133+K04404+K04427+K04730+K04734+K02580+K03156+K06483+K03175+K13377+K04729+K04375+K04448+K05719+K13536+K08012+K11217+K11987+K06498+K04733+K05132+K08011+K04687+K04519+K05697+K08009+K04403
Melanoma	268	ko05218	1	>Unigene0102043;	Unigene0001375;Unigene0001376;Unigene0004201;Unigene0004274;Unigene0004464;Unigene0005156;Unigene0007120;Unigene0007922;Unigene0009860;Unigene0010411;Unigene0011216;Unigene0011702;Unigene0013986;Unigene0014940;Unigene0014941;Unigene0014942;Unigene0014943;Unigene0017456;Unigene0017457;Unigene0019554;Unigene0019556;Unigene0019587;Unigene0019923;Unigene0019924;Unigene0020724;Unigene0020763;Unigene00…	K05087+K07827+K04358+K02649+K02089+K04361+K06620+K04363+K04456+K00922+K04362+K08845+K04366+K05089+K04371+K01110+K04359+K09455+K05459+K06625+K06618+K02091+K06643+K04503+K05460+K04451+K04365+K04369+K05099+K09389+K05450+K05689+K04357+K04368+K02833
Endometrial cancer	262	ko05213	2	>Unigene0050077;>Unigene0090415;	Unigene0004201;Unigene0007922;Unigene0008131;Unigene0009232;Unigene0011702;Unigene0011957;Unigene0012352;Unigene0012620;Unigene0012621;Unigene0013986;Unigene0014418;Unigene0017016;Unigene0017017;Unigene0017576;Unigene0017578;Unigene0017579;Unigene0017601;Unigene0018394;Unigene0019554;Unigene0019556;Unigene0019587;Unigene0019923;Unigene0019924;Unigene0020763;Unigene0020764;Unigene0021077;Unigene00…	K07827+K02649+K04492+K04385+K04361+K04364+K04377+K08734+K03099+K04399+K04491+K04456+K00922+K06272+K08845+K04366+K09408+K04371+K01110+K02085+K02620+K04503+K02157+K02105+K04451+K04365+K04369+K05691+K04375+K03083+K04490+K05689+K06276+K04357+K04368+K02833+K05083
Rheumatoid arthritis	233	ko05323	10	>Unigene0058819;>Unigene0105577;>Unigene0123488;>Unigene0128267;>Unigene0128738;>Unigene0140013;>Unigene0146262;>Unigene0146279;>Unigene0149954;>Unigene0151753;	Unigene0000421;Unigene0006056;Unigene0006057;Unigene0006058;Unigene0008255;Unigene0011017;Unigene0011113;Unigene0011114;Unigene0012660;Unigene0012692;Unigene0014005;Unigene0015074;Unigene0015727;Unigene0015900;Unigene0016199;Unigene0016650;Unigene0016651;Unigene0016652;Unigene0016653;Unigene0016654;Unigene0016655;Unigene0016656;Unigene0017251;Unigene0017252;Unigene0017253;Unigene0017254;Unigene00…	K06752+K04379+K02148+K05476+K02154+K06464+K06856+K13375+K03661+K01371+K05448+K02147+K10785+K05096+K03662+K01365+K05718+K13376+K10159+K05147+K02145+K10030+K05465+K14379+K03156+K02144+K13377+K02150+K14625+K02153+K04448+K02149+K02152+K05489+K02155+K02146+K10031+K12499+K04687+K04519+K05412+K05413+K05417+K02151+K01394
Staphylococcus aureus infection	231	ko05150	2	>Unigene0010488;>Unigene0133365;	Unigene0000421;Unigene0007476;Unigene0010488;Unigene0010742;Unigene0011733;Unigene0012692;Unigene0014005;Unigene0015074;Unigene0015332;Unigene0015944;Unigene0016137;Unigene0016330;Unigene0016331;Unigene0017439;Unigene0019413;Unigene0019414;Unigene0019415;Unigene0020266;Unigene0020654;Unigene0020655;Unigene0020716;Unigene0021241;Unigene0022879;Unigene0022882;Unigene0022887;Unigene0022891;Unigene00…	K06752+K03993+K05443+K03990+K01335+K06464+K06856+K03989+K01333+K01332+K04010+K10785+K03994+K04004+K01330+K05718+K06461+K03988+K03992+K06496+K03905+K01331+K03986+K03987+K01334+K06498+K01315+K04279
Basal cell carcinoma	230	ko05217	2	>Unigene0050077;>Unigene0090415;	Unigene0000505;Unigene0001323;Unigene0003044;Unigene0004782;Unigene0006989;Unigene0007221;Unigene0007222;Unigene0007365;Unigene0007366;Unigene0007367;Unigene0007571;Unigene0007621;Unigene0007622;Unigene0008075;Unigene0008131;Unigene0008471;Unigene0009232;Unigene0011116;Unigene0011264;Unigene0011526;Unigene0012620;Unigene0012621;Unigene0012845;Unigene0013137;Unigene0013360;Unigene0013363;Unigene00…	K00182+K06230+K11988+K06225+K00714+K00444+K00408+K04662+K04492+K02353+K04385+K06231+K06228+K01064+K04491+K02085+K02432+K02620+K06229+K06226+K00312+K11101+K02157+K00572+K02375+K01558+K01357+K02105+K04451+K02842+K02354+K03083+K04490+K02329+K02376+K01384
Arginine and proline metabolism	214	ko00330	1	>Unigene0136515;	Unigene0004100;Unigene0005987;Unigene0009409;Unigene0009447;Unigene0009448;Unigene0009449;Unigene0009803;Unigene0010205;Unigene0010345;Unigene0010967;Unigene0012407;Unigene0012579;Unigene0012580;Unigene0014163;Unigene0014164;Unigene0015789;Unigene0016608;Unigene0016609;Unigene0016706;Unigene0018030;Unigene0018547;Unigene0020065;Unigene0020066;Unigene0020067;Unigene0020068;Unigene0020243;Unigene00…	K01425+K00933+K14455+K01948+K00318+K00657+K12657+K00286+K01476+K00294+K00261+K00797+K01915+K00472+K00128+K00149+K14677+K00802+K00273+K00613+K11394+K14454+K01940+K13240+K00274+K00542+K14085+K11067+K01755+K01611+K11142+K01581+K00819+K00611+K01480
Antigen processing and presentation	206	ko04612	3	>Unigene0145226;>Unigene0146262;>Unigene0154083;	Unigene0000421;Unigene0003402;Unigene0005996;Unigene0009908;Unigene0010674;Unigene0011570;Unigene0012467;Unigene0012468;Unigene0012469;Unigene0012692;Unigene0013867;Unigene0014545;Unigene0015407;Unigene0015737;Unigene0015739;Unigene0017909;Unigene0017910;Unigene0018378;Unigene0020654;Unigene0020655;Unigene0023717;Unigene0023718;Unigene0024601;Unigene0025289;Unigene0025831;Unigene0027130;Unigene00…	K06752+K06459+K06751+K05870+K03283+K04079+K06454+K08058+K08063+K10785+K08057+K01365+K01368+K01363+K08062+K08054+K05654+K03156+K08066+K09489+K08064+K06696+K08065+K08055+K08056+K05653+K06458+K08061+K06505+K01369+K08059+K04687+K06697+K08060+K06698
Cytosolic DNA-sensing pathway	188	ko04623	23	>Unigene0010581;>Unigene0010582;>Unigene0022787;>Unigene0022788;>Unigene0042665;>Unigene0051616;>Unigene0061769;>Unigene0065181;>Unigene0065182;>Unigene0065183;>Unigene0077137;>Unigene0078829;>Unigene0078831;>Unigene0078941;>Unigene0090429;>Unigene0090430;>Unigene0114771;>Unigene0116897;>Unigene0122127;>Unigene0131170;>Unigene0133383;>Unigene0146279;>Unigene0153887;	Unigene0006894;Unigene0008774;Unigene0010581;Unigene0010582;Unigene0014013;Unigene0014014;Unigene0014015;Unigene0014031;Unigene0014032;Unigene0014478;Unigene0015120;Unigene0015790;Unigene0016983;Unigene0017291;Unigene0019480;Unigene0020936;Unigene0021017;Unigene0022787;Unigene0022788;Unigene0025537;Unigene0025538;Unigene0025539;Unigene0025540;Unigene0025541;Unigene0026606;Unigene0027379;Unigene00…	K12799+K01370+K09447+K03024+K12654+K05410+K04467+K03018+K02861+K12968+K05414+K03023+K03021+K04735+K07210+K03025+K03016+K12648+K07211+K08847+K04734+K14721+K05411+K02580+K07209+K03019+K03027+K03014+K03022+K03026+K03009+K03013+K03020+K12499+K04519+K03007
Fat digestion and absorption	178	ko04975	13	>Unigene0007826;>Unigene0022415;>Unigene0022416;>Unigene0022417;>Unigene0050583;>Unigene0075326;>Unigene0075328;>Unigene0083459;>Unigene0097933;>Unigene0099227;>Unigene0124387;>Unigene0127543;>Unigene0145874;	Unigene0000022;Unigene0006629;Unigene0006949;Unigene0007826;Unigene0008021;Unigene0008022;Unigene0009061;Unigene0009062;Unigene0009228;Unigene0009229;Unigene0009409;Unigene0009800;Unigene0012638;Unigene0013993;Unigene0015904;Unigene0015906;Unigene0021327;Unigene0021328;Unigene0022415;Unigene0022416;Unigene0022417;Unigene0022838;Unigene0023582;Unigene0024825;Unigene0025017;Unigene0028084;Unigene00…	K05641+K08751+K14462+K01047+K14455+K14074+K14073+K01080+K14457+K11155+K11160+K05684+K06259+K13885+K14461+K14463+K12298+K08760+K08750+K05683+K13509
Bladder cancer	171	ko05219	5	>Unigene0058819;>Unigene0105577;>Unigene0123488;>Unigene0128738;>Unigene0140013;	Unigene0004201;Unigene0007951;Unigene0008545;Unigene0008546;Unigene0010411;Unigene0011702;Unigene0011993;Unigene0012352;Unigene0014940;Unigene0014941;Unigene0014942;Unigene0014943;Unigene0017251;Unigene0017252;Unigene0017253;Unigene0017254;Unigene0019554;Unigene0019556;Unigene0021206;Unigene0022192;Unigene0022193;Unigene0022907;Unigene0023795;Unigene0024477;Unigene0038682;Unigene0038935;Unigene00…	K07827+K05449+K00758+K02089+K04361+K01398+K04377+K06620+K05448+K08845+K04366+K08803+K04371+K06625+K06618+K06643+K04503+K09850+K10030+K04451+K04365+K04369+K05094+K09389+K05689+K01403+K04357+K04368+K02833+K05083
Alanine, aspartate and glutamate metabolism	168	ko00250	1	>Unigene0136515;	Unigene0004100;Unigene0004394;Unigene0009409;Unigene0009447;Unigene0009448;Unigene0009449;Unigene0009801;Unigene0009802;Unigene0009803;Unigene0012666;Unigene0014016;Unigene0015733;Unigene0015734;Unigene0017290;Unigene0018030;Unigene0018217;Unigene0018547;Unigene0020065;Unigene0020066;Unigene0020067;Unigene0020068;Unigene0020243;Unigene0022019;Unigene0022616;Unigene0025605;Unigene0025606;Unigene00…	K01425+K01939+K14455+K01948+K00814+K00830+K13566+K00294+K00764+K00261+K00827+K03334+K00139+K01915+K01953+K14454+K01940+K01580+K00820+K01756+K00272+K01437+K01755+K11540+K13524
Malaria	159	ko05144	10	>Unigene0010488;>Unigene0058819;>Unigene0102043;>Unigene0105577;>Unigene0123488;>Unigene0128738;>Unigene0133365;>Unigene0140013;>Unigene0146262;>Unigene0146279;	Unigene0001468;Unigene0009385;Unigene0010488;Unigene0012433;Unigene0014005;Unigene0015473;Unigene0015727;Unigene0020631;Unigene0020654;Unigene0020655;Unigene0022399;Unigene0029765;Unigene0038193;Unigene0039289;Unigene0039886;Unigene0040368;Unigene0040418;Unigene0040645;Unigene0040950;Unigene0040951;Unigene0042063;Unigene0042064;Unigene0042065;Unigene0042474;Unigene0044095;Unigene0044096;Unigene00…	K04659+K03160+K05443+K06471+K06464+K13375+K06527+K10785+K06257+K04550+K05718+K13376+K10159+K05460+K10030+K06259+K06496+K03156+K13377+K10161+K03161+K04729+K05099+K06508+K06494+K04687+K04519
Prion diseases	158	ko05020	1	>Unigene0146279;	Unigene0002253;Unigene0005422;Unigene0011059;Unigene0011060;Unigene0014951;Unigene0017704;Unigene0017705;Unigene0017706;Unigene0017708;Unigene0017709;Unigene0017710;Unigene0017711;Unigene0017712;Unigene0017714;Unigene0018208;Unigene0021241;Unigene0021344;Unigene0021347;Unigene0021348;Unigene0021974;Unigene0021975;Unigene0023795;Unigene0030774;Unigene0040763;Unigene0040927;Unigene0040928;Unigene00…	K09203+K06491+K03997+K05635+K05703+K04345+K03994+K02159+K04371+K03988+K03996+K09490+K03995+K04000+K04369+K04375+K09553+K03986+K03987+K04565+K04368+K12499+K04519+K03998+K03999
Galactose metabolism	153	ko00052	1	>Unigene0096779;	Unigene0012612;Unigene0014756;Unigene0017678;Unigene0017679;Unigene0017680;Unigene0017681;Unigene0017682;Unigene0017683;Unigene0017684;Unigene0017685;Unigene0017686;Unigene0017687;Unigene0017688;Unigene0018681;Unigene0022871;Unigene0022872;Unigene0023030;Unigene0023031;Unigene0023032;Unigene0023033;Unigene0024231;Unigene0024232;Unigene0027294;Unigene0028910;Unigene0037355;Unigene0040714;Unigene00…	K01189+K00011+K01084+K12047+K12309+K00850+K00849+K01835+K00844+K12317+K12316+K00963+K00965+K07966+K01784+K07967
Amino sugar and nucleotide sugar metabolism	153	ko00520	1	>Unigene0096779;	Unigene0003015;Unigene0004403;Unigene0004506;Unigene0004719;Unigene0011566;Unigene0016455;Unigene0016994;Unigene0016995;Unigene0017670;Unigene0018257;Unigene0018258;Unigene0018643;Unigene0020527;Unigene0020528;Unigene0023015;Unigene0024231;Unigene0024232;Unigene0027204;Unigene0028850;Unigene0028910;Unigene0030845;Unigene0032223;Unigene0041151;Unigene0041743;Unigene0042588;Unigene0042589;Unigene00…	K01810+K02564+K01443+K00884+K00012+K00326+K01787+K01183+K00972+K00976+K00849+K01835+K00621+K00983+K12409+K00844+K12373+K08678+K01639+K01840+K02377+K00966+K01809+K00963+K00965+K05305+K00820+K01711+K01784+K05304+K01836
Thyroid cancer	146	ko05216	2	>Unigene0050077;>Unigene0090415;	Unigene0004201;Unigene0007891;Unigene0008131;Unigene0012352;Unigene0017157;Unigene0017158;Unigene0017159;Unigene0017601;Unigene0019043;Unigene0019045;Unigene0019046;Unigene0019047;Unigene0019554;Unigene0019556;Unigene0023795;Unigene0024006;Unigene0026611;Unigene0039161;Unigene0041502;Unigene0041744;Unigene0043929;Unigene0046083;Unigene0046554;Unigene0050077;Unigene0050126;Unigene0050764;Unigene00…	K07827+K08524+K04492+K04377+K08525+K04491+K09290+K04371+K09291+K02620+K05126+K04503+K03176+K09293+K02105+K08530+K04451+K04365+K04369+K08526+K04490+K09292+K09288+K05689+K09289+K04368+K02833
RNA polymerase	138	ko03020	5	>Unigene0065181;>Unigene0065182;>Unigene0065183;>Unigene0078941;>Unigene0116897;	Unigene0004195;Unigene0005745;Unigene0005754;Unigene0007550;Unigene0009343;Unigene0009529;Unigene0010338;Unigene0010339;Unigene0012088;Unigene0014031;Unigene0014032;Unigene0016983;Unigene0019393;Unigene0020696;Unigene0023274;Unigene0023887;Unigene0024419;Unigene0024420;Unigene0026524;Unigene0039233;Unigene0040305;Unigene0040689;Unigene0041329;Unigene0041767;Unigene0042465;Unigene0042466;Unigene00…	K03002+K03006+K03015+K03024+K03018+K02999+K03023+K03021+K03000+K03010+K03025+K03016+K03005+K14721+K03019+K03027+K03014+K03022+K03026+K03009+K03013+K03020+K03012+K03011+K03008+K03017+K03007
Autoimmune thyroid disease	134	ko05320	10	>Unigene0010488;>Unigene0022787;>Unigene0022788;>Unigene0042665;>Unigene0051616;>Unigene0090429;>Unigene0090430;>Unigene0133365;>Unigene0133383;>Unigene0153887;	Unigene0000421;Unigene0005996;Unigene0008033;Unigene0009385;Unigene0009908;Unigene0010488;Unigene0012692;Unigene0013165;Unigene0015074;Unigene0015737;Unigene0015739;Unigene0017909;Unigene0017910;Unigene0020654;Unigene0020655;Unigene0020716;Unigene0022787;Unigene0022788;Unigene0023890;Unigene0024601;Unigene0025831;Unigene0027130;Unigene0027131;Unigene0027132;Unigene0027134;Unigene0027135;Unigene00…	K06752+K06751+K01353+K03160+K05443+K04389+K06856+K10785+K05414+K07818+K00431+K10809+K04249+K04390+K03161+K08522+K05412+K05413+K05251
Type I diabetes mellitus	133	ko04940	5	>Unigene0034168;>Unigene0096404;>Unigene0134798;>Unigene0146262;>Unigene0146279;	Unigene0000421;Unigene0004154;Unigene0005996;Unigene0008033;Unigene0009908;Unigene0012692;Unigene0013165;Unigene0015737;Unigene0015739;Unigene0017909;Unigene0017910;Unigene0020654;Unigene0020655;Unigene0023199;Unigene0023890;Unigene0024601;Unigene0025831;Unigene0027130;Unigene0027131;Unigene0027132;Unigene0027134;Unigene0027135;Unigene0027687;Unigene0034168;Unigene0038193;Unigene0039289;Unigene00…	K06752+K04526+K06751+K01353+K04389+K10785+K07817+K07818+K05425+K04077+K03156+K05468+K04390+K01580+K01294+K04687+K04519+K05412+K05413
Nicotinate and nicotinamide metabolism	132	ko00760	9	>Unigene0072581;>Unigene0072584;>Unigene0072586;>Unigene0072589;>Unigene0072595;>Unigene0128264;>Unigene0144125;>Unigene0144127;>Unigene0144128;	Unigene0002173;Unigene0003230;Unigene0004857;Unigene0006634;Unigene0009661;Unigene0009732;Unigene0009733;Unigene0009734;Unigene0015009;Unigene0015010;Unigene0017185;Unigene0017624;Unigene0018076;Unigene0018077;Unigene0028148;Unigene0040827;Unigene0041778;Unigene0043087;Unigene0043185;Unigene0049365;Unigene0055027;Unigene0058493;Unigene0058494;Unigene0058495;Unigene0058496;Unigene0058771;Unigene00…	K01081+K00323+K01239+K00858+K06210+K03426+K10524+K01242+K00767+K03783+K01513+K01950+K00763+K06989+K00157+K03462
Primary immunodeficiency	125	ko05340	12	>Unigene0023600;>Unigene0068636;>Unigene0068638;>Unigene0068642;>Unigene0068643;>Unigene0068644;>Unigene0068645;>Unigene0068646;>Unigene0109011;>Unigene0131619;>Unigene0131620;>Unigene0141111;	Unigene0003402;Unigene0005621;Unigene0005622;Unigene0009141;Unigene0009182;Unigene0009385;Unigene0012471;Unigene0013867;Unigene0015074;Unigene0015283;Unigene0015407;Unigene0015565;Unigene0015566;Unigene0019367;Unigene0020716;Unigene0023600;Unigene0039886;Unigene0041017;Unigene0041018;Unigene0041019;Unigene0041451;Unigene0042369;Unigene0042604;Unigene0042605;Unigene0043673;Unigene0045891;Unigene00…	K06459+K06506+K03648+K10989+K03160+K07370+K06454+K06856+K07360+K08063+K10887+K06478+K05072+K07371+K07210+K10628+K05856+K08062+K01488+K05654+K03161+K05070+K05653+K06458+K08061+K06451+K06450+K08060+K05151+K05150
Allograft rejection	119	ko05330	6	>Unigene0010488;>Unigene0034168;>Unigene0096404;>Unigene0133365;>Unigene0134798;>Unigene0146262;	Unigene0000421;Unigene0005996;Unigene0008033;Unigene0009385;Unigene0009908;Unigene0010488;Unigene0012692;Unigene0013165;Unigene0015074;Unigene0015737;Unigene0015739;Unigene0017909;Unigene0017910;Unigene0020654;Unigene0020655;Unigene0020716;Unigene0023890;Unigene0024601;Unigene0025831;Unigene0027130;Unigene0027131;Unigene0027132;Unigene0027134;Unigene0027135;Unigene0027687;Unigene0034168;Unigene00…	K06752+K06751+K01353+K03160+K05443+K04389+K06856+K10785+K07818+K05425+K03156+K04390+K03161+K04687+K05412+K05413
Regulation of autophagy	114	ko04140	9	>Unigene0022787;>Unigene0022788;>Unigene0042665;>Unigene0051616;>Unigene0090429;>Unigene0090430;>Unigene0133383;>Unigene0146262;>Unigene0153887;	Unigene0002838;Unigene0004154;Unigene0011586;Unigene0012219;Unigene0014463;Unigene0015375;Unigene0016153;Unigene0016154;Unigene0016155;Unigene0016156;Unigene0016157;Unigene0017111;Unigene0017346;Unigene0017347;Unigene0018860;Unigene0018861;Unigene0018863;Unigene0018866;Unigene0018869;Unigene0020431;Unigene0020592;Unigene0020593;Unigene0020594;Unigene0022151;Unigene0022595;Unigene0022787;Unigene00…	K07198+K04526+K08337+K08342+K08341+K08334+K08343+K08269+K08333+K05414+K00914+K08332+K08339+K04687
African trypanosomiasis	105	ko05143	7	>Unigene0010488;>Unigene0034168;>Unigene0096404;>Unigene0133365;>Unigene0134798;>Unigene0146262;>Unigene0146279;	Unigene0003354;Unigene0010488;Unigene0013165;Unigene0015074;Unigene0017815;Unigene0020631;Unigene0020716;Unigene0024058;Unigene0024059;Unigene0024060;Unigene0024061;Unigene0024062;Unigene0024063;Unigene0024558;Unigene0024559;Unigene0024560;Unigene0025262;Unigene0034168;Unigene0061523;Unigene0062639;Unigene0068776;Unigene0068777;Unigene0068778;Unigene0073781;Unigene0077872;Unigene0080364;Unigene00…	K04234+K05443+K04389+K06856+K05858+K06527+K02677+K04634+K00463+K05425+K03156+K04390+K10161+K04729+K06241+K06494+K01392+K04687+K04519
Graft-versus-host disease	100	ko05332	2	>Unigene0146262;>Unigene0146279;	Unigene0000421;Unigene0005996;Unigene0008033;Unigene0009908;Unigene0012692;Unigene0013165;Unigene0015737;Unigene0015739;Unigene0017909;Unigene0017910;Unigene0020654;Unigene0020655;Unigene0023890;Unigene0024601;Unigene0025831;Unigene0027130;Unigene0027131;Unigene0027132;Unigene0027134;Unigene0027135;Unigene0027687;Unigene0038193;Unigene0039289;Unigene0039851;Unigene0040021;Unigene0040022;Unigene00…	K06752+K06751+K01353+K04389+K10785+K07818+K03156+K04390+K04687+K04519+K05412+K05413
Intestinal immune network for IgA production	98	ko04672	3	>Unigene0010488;>Unigene0128667;>Unigene0133365;	Unigene0000421;Unigene0003191;Unigene0009182;Unigene0009385;Unigene0010488;Unigene0011017;Unigene0012692;Unigene0015074;Unigene0015727;Unigene0015772;Unigene0016912;Unigene0020654;Unigene0020655;Unigene0020716;Unigene0024601;Unigene0025831;Unigene0026862;Unigene0038193;Unigene0039289;Unigene0039886;Unigene0039985;Unigene0040021;Unigene0040022;Unigene0041075;Unigene0041076;Unigene0041077;Unigene00…	K06752+K06710+K10989+K03160+K05443+K05476+K06856+K13375+K13073+K10785+K04466+K04189+K03159+K06483+K03161+K06590+K04184+K13072+K05074+K10031+K05412+K05413+K05151+K05150
Proteasome	75	ko03050	1	>Unigene0146262;	Unigene0010522;Unigene0024656;Unigene0025781;Unigene0045304;Unigene0045305;Unigene0062380;Unigene0068839;Unigene0075788;Unigene0075789;Unigene0082656;Unigene0082657;Unigene0082658;Unigene0082659;Unigene0082660;Unigene0096302;Unigene0096570;Unigene0097922;Unigene0099230;Unigene0101159;Unigene0102990;Unigene0103316;Unigene0103478;Unigene0103725;Unigene0103810;Unigene0104078;Unigene0104177;Unigene01…	K03033+K06699+K03064+K02739+K02740+K02738+K03030+K03039+K03028+K02736+K10881+K02727+K02730+K06696+K02726+K03037+K03029+K02729+K03035+K02732+K02725+K03062+K02734+K02728+K02735+K03065+K06700+K02741+K03061+K03066+K02737+K04687+K06697+K03036+K03032+K11599+K02731+K03038+K03063+K06698
Asthma	56	ko05310	2	>Unigene0010488;>Unigene0133365;	Unigene0000421;Unigene0009385;Unigene0010488;Unigene0012692;Unigene0015074;Unigene0020654;Unigene0020655;Unigene0020716;Unigene0024601;Unigene0025831;Unigene0038193;Unigene0039289;Unigene0039886;Unigene0040021;Unigene0040022;Unigene0042474;Unigene0042640;Unigene0043049;Unigene0045891;Unigene0049254;Unigene0049255;Unigene0051026;Unigene0062639;Unigene0077982;Unigene0077983;Unigene0081260;Unigene00…	K06752+K03160+K05443+K06856+K10785+K07983+K03156+K03161+K10788+K08090
Riboflavin metabolism	27	ko00740	1	>Unigene0151753;	Unigene0023870;Unigene0040229;Unigene0045433;Unigene0045543;Unigene0050543;Unigene0063354;Unigene0067412;Unigene0067413;Unigene0067414;Unigene0068887;Unigene0079522;Unigene0096738;Unigene0103094;Unigene0104467;Unigene0115790;Unigene0117480;Unigene0121197;Unigene0121198;Unigene0124006;Unigene0136114;Unigene0136581;Unigene0138316;Unigene0145406;Unigene0145407;Unigene0146241;Unigene0151753;Unigene01…	K00505+K14395+K00953+K01513+K14379+K05901+K14394+K14410+K00861
