# Supplementary material for: Transcriptome Analysis of the Trachinotus ovatus: Identification of Reproduction, Growth and Immune-Related Genes and Microsatellite Markers
Source: PLoS One. 2014 Oct 10;9(10):e109419. doi: 10.1371/journal.pone.0109419 (PMC4193775; doi:10.1371/journal.pone.0109419)
Supplement: Table S8 — Information of 290 SSRs primer pairs derived from unigenes. (XLSX) [file pone.0109419.s009.xlsx]

## Sheet: Jinchang-ssr-filter
ID	SSR nr.	SSR type	SSR	size	start	end	FORWARD PRIMER1 (5'-3')	Tm(癈)	size	REVERSE PRIMER1 (5'-3')	Tm(癈)	size	PRODUCT1 size (bp)	start (bp)	end (bp)	FORWARD PRIMER2 (5'-3')	Tm(癈)	size	REVERSE PRIMER2 (5'-3')	Tm(癈)	size	PRODUCT2 size (bp)	start (bp)	end (bp)	FORWARD PRIMER3 (5'-3')	Tm(癈)	size	REVERSE PRIMER3 (5'-3')	Tm(癈)	size	PRODUCT3 size (bp)	start (bp)	end (bp)	Nr-ID	Nr-Score	Nr-Evalue	Nr-annotation	Swissprot-ID	Swissprot-Score	Swissprot-Evalue	Swissprot-annotation	COG-Protein-or-Domain	COG-Score	COG-Evalue	COG-ID	COG-Function-Description	KO_id
Unigene0000620	1	p2	(AC)9	18	394	411	TTTTCCTCCTGGTGATCTGC	60.195	20	GTGCACATGAGTGTGTGTGC	59.779	20	165	270	434	TTTTCCTCCTGGTGATCTGC	60.195	20	ACAAGGAGGGGCAACAGTTA	59.592	20	242	270	511	TTTTCCTCCTGGTGATCTGC	60.195	20	AAGGAGGGGCAACAGTTACA	59.592	20	240	270	509	--	--	--	--	--	--	--	--	--	--	--	--	--	--
Unigene0002551	1	p2	(AT)11	22	438	459	CTGGGCTGTTTCAGGTTGTT	60.149	20	GAGTGCAAAGTGCCATGTGT	59.758	20	193	308	500	CTGGGCTGTTTCAGGTTGTT	60.149	20	TCATGAGTGCAAAGTGCCAT	60.272	20	197	308	504	CTGGGCTGTTTCAGGTTGTT	60.149	20	ATCATGAGTGCAAAGTGCCA	60.272	20	198	308	505	--	--	--	--	--	--	--	--	--	--	--	--	--	--
Unigene0005195	1	c	(TG)9cgtgcacgtatgtgcatgtgtgcaggtatgcaagagtgtgcatgtaaatgtgtgtaaa(AG)11	98	99	196	GCAGAATGGGCATTTGTTCT	60.081	20	CATTACTTGGTGCTGAGCCA	59.864	20	250	8	257	GCAGAATGGGCATTTGTTCT	60.081	20	ACTTGGTGCTGAGCCATTTC	60.263	20	246	8	253	TGCTTCCACTGGCATGTAAA	60.257	20	CACGGACAGCCAGTCCTTAT	60.134	20	257	45	301	gi|47213133|emb|CAF96628.1|	52.8	5e-06	unnamed protein product [Tetraodon nigroviridis]	--	--	--	--	--	--	--	--	--	--
Unigene0008209	1	p2	(CA)9	18	72	89	GCCCTGTTTAATAACACATACAAAAA	59.662	26	TGGTGGCAGTTTGTTCTCAG	59.873	20	234	0	233	GCCCTGTTTAATAACACATACAAAA	58.551	25	TGGTGGCAGTTTGTTCTCAG	59.873	20	234	0	233	GCCCTGTTTAATAACACATACAAAAA	59.662	26	TTGGTGGCAGTTTGTTCTCA	60.278	20	235	0	234	--	--	--	--	--	--	--	--	--	--	--	--	--	--
Unigene0010925	2	p2	(TG)9	18	124	141	GCAGCTCAGTGCGTCATAAT	59.057	20	TACAGCAATGAGCCAGACCA	60.413	20	127	50	176	GCAGCTCAGTGCGTCATAAT	59.057	20	AGCAATGAGCCAGACCAAAA	60.776	20	124	50	173	TGCAGCTCAGTGCGTCATA	60.315	19	TACAGCAATGAGCCAGACCA	60.413	20	128	49	176	--	--	--	--	--	--	--	--	--	--	--	--	--	--
Unigene0014283	1	p2	(AC)9	18	59	76	CGATGAATGATTTCACCACG	59.924	20	GGCACAAGGGTACAGCATTT	60	20	191	30	220	CGATGAATGATTTCACCACG	59.924	20	TCTGAACTCTGCGGTTGATG	59.984	20	115	30	144	CGATGAATGATTTCACCACG	59.924	20	CCCAGAAACTGGGACTTCAA	60.081	20	158	30	187	--	--	--	--	--	--	--	--	--	--	--	--	--	--
Unigene0014294	1	p2	(TA)12	24	62	85	CAATGCTGACTTTTGAAACCA	58.808	21	CACTGTGTGGATCTGGATGG	59.954	20	280	0	279	CAATGCTGACTTTTGAAACCA	58.808	21	TGTGGATCTGGATGGACAGA	60.046	20	275	0	274	CAATGCTGACTTTTGAAACCA	58.808	21	GGAGGGACATGGACAGTGTT	59.817	20	149	0	148	--	--	--	--	--	--	--	--	--	--	--	--	--	--
Unigene0014377	1	p2	(TG)9	18	45	62	GTGTGTGTGTTATAATGTGTGTGTTAT	57.071	27	TGCTGAGTATGCTGCCTGAC	60.168	20	152	0	151	GTGTGTGTGTTATAATGTGTGTGTTAT	57.071	27	CTGCCTGACTCTGGTCCAAT	60.261	20	141	0	140	GTGTGTGTGTTATAATGTGTGTGTTAT	57.071	27	CTGCTGAGTATGCTGCCTGA	60.31	20	153	0	152	--	--	--	--	--	--	--	--	--	--	--	--	--	--
Unigene0014416	1	p2	(AT)11	22	101	122	CGAGACGCATTGCTGAATAA	59.976	20	CGAGACGCATTGCTGAATAA	59.976	20	152	35	186	CGAGACGCATTGCTGAATAA	59.976	20	TAGTCAGTTGAGGTTGGCCC	60.111	20	173	35	207	TAGTCAGTTGAGGTTGGCCC	60.111	20	CGAGACGCATTGCTGAATAA	59.976	20	173	14	186	--	--	--	--	--	--	--	--	--	--	--	--	--	--
Unigene0014641	1	p2	(AC)9	18	110	127	TCTGGGGAAGATGAGAAGGA	59.731	20	CCCTTCAGCACAGTCAGTCA	60.022	20	133	84	216	TCTGGGGAAGATGAGAAGGA	59.731	20	TGGTTTGAATCCCACACTGA	59.935	20	222	84	305	TCTGGGGAAGATGAGAAGGA	59.731	20	GAGCAGCAGAGGAAAAGGTG	60.134	20	276	84	359	gi|348541739|ref|XP_003458344.1|	117	7e-25	PREDICTED: carbohydrate sulfotransferase 8-like [Oreochromis niloticus]	sp|Q8BQ86|CHST8_MOUSE	75.1	6e-13	Carbohydrate sulfotransferase 8 OS=Mus musculus GN=Chst8 PE=2 SV=1	--	--	--	--	--	K09672
Unigene0014844	1	p2	(CA)10	20	1278	1297	TGCTCCTCTCTGAGCTCCTC	59.969	20	AATGGACCGAAACACTCAGG	59.966	20	168	1214	1381	TTGCTCAGTTCCTGCTCCTT	60.134	20	AATGGACCGAAACACTCAGG	59.966	20	231	1151	1381	TTGCTCAGTTCCTGCTCCTT	60.134	20	GAGCTGGAGCTCAAATGGAC	59.957	20	244	1151	1394	gi|348538541|ref|XP_003456749.1|	926	0	PREDICTED: protein FAM184A-like [Oreochromis niloticus]	sp|Q8NB25|F184A_HUMAN	545	0	Protein FAM184A OS=Homo sapiens GN=FAM184A PE=2 SV=3	MK0690	114	1e-24	COG0419	ATPase involved in DNA repair	--
Unigene0016399	2	p2	(CA)9	18	205	222	CACTCTCACACACACAGGCA	59.454	20	AGGGTATGAACATGTGCGCT	60.547	20	139	178	316	TGGTGGGAGGAGACAGGTAT	59.38	20	AGGGTATGAACATGTGCGCT	60.547	20	265	52	316	ATGGTGGGAGGAGACAGGTA	59.38	20	AGGGTATGAACATGTGCGCT	60.547	20	266	51	316	gi|348527264|ref|XP_003451139.1|	382	1e-104	PREDICTED: septin-5-like [Oreochromis niloticus]	sp|Q9Z2Q6|SEPT5_MOUSE	335	4e-91	Septin-5 OS=Mus musculus GN=Sept5 PE=1 SV=2	SPAC4F10.11	122	2e-27	COG5019	Septin family protein	K04557
Unigene0016955	1	p2	(GT)9	18	73	90	GGAGCATTAATAGATCGTCATCG	59.969	23	CTGCAGCATTAGTCTGGCTG	59.764	20	209	41	249	GGAGCATTAATAGATCGTCATCG	59.969	23	GCTGAGCGCCACTGTAGTTT	60.602	20	193	41	233	GGAGCATTAATAGATCGTCATCG	59.969	23	AGCATTAGTCTGGCTGAGCG	60.699	20	205	41	245	--	--	--	--	--	--	--	--	--	--	--	--	--	--
Unigene0017048	1	p2	(CA)9	18	568	585	GGTCACCTGAGTCCTGGTGT	60.006	20	AGCTGCAGCCCTGAGATAAG	59.74	20	275	432	706	TAGGGTCACCTGAGTCCTGG	60.104	20	AGCTGCAGCCCTGAGATAAG	59.74	20	278	429	706	GGTCACCTGAGTCCTGGTGT	60.006	20	GCTGCAGCCCTGAGATAAGT	59.603	20	274	432	705	gi|348524650|ref|XP_003449836.1|	64.7	4e-09	PREDICTED: patatin-like phospholipase domain-containing protein 2-like [Oreochromis niloticus]	--	--	--	--	--	--	--	--	--	--
Unigene0017814	1	p2	(TG)9	18	728	745	GGATGTAACAGGCGGAAGAG	59.694	20	ACATGCAGCAGATGGTGAAG	59.862	20	233	628	860	TGCACTGTCTGATCCCTGTC	59.827	20	ACACGTATACAGGCGCACAC	59.67	20	203	571	773	TGTAACAGGCGGAAGAGAGG	60.388	20	ACATGCAGCAGATGGTGAAG	59.862	20	230	631	860	gi|327554114|gb|AEB00560.1|	289	1e-76	isotocin [Amphiprion melanopus]	sp|O42493|NEUI_TAKRU	245	3e-64	Isotocin-neurophysin IT 1 OS=Takifugu rubripes PE=3 SV=1	--	--	--	--	--	K05242
Unigene0019285	1	p2	(CA)9	18	537	554	CAACACCATCACCTCACCTG	59.997	20	CTCTTAGTTTCAGCGTCCCG	60.008	20	234	486	719	GTGCAACACCATCACCTCAC	60.013	20	CTCTTAGTTTCAGCGTCCCG	60.008	20	237	483	719	CAACACCATCACCTCACCTG	59.997	20	AGAGGGAGGAAACAAACGGT	59.972	20	164	486	649	gi|348504946|ref|XP_003440022.1|	196	2e-75	PREDICTED: E3 ubiquitin-protein ligase RNF220-like [Oreochromis niloticus]	sp|Q5VTB9|RN220_HUMAN	116	3e-50	E3 ubiquitin-protein ligase RNF220 OS=Homo sapiens GN=RNF220 PE=1 SV=1	--	--	--	--	--	--
Unigene0019389	1	p2	(TG)9	18	1079	1096	TGCTGCTCTGCATTATCCAC	59.979	20	GGAGAGACCAGAGGAGGCTT	59.952	20	280	1002	1281	TTCTGTCCATGTCCCAAACA	59.935	20	AGACGAGAGGAGAGCTGCTG	60.033	20	275	1035	1309	TTCTGTCCATGTCCCAAACA	59.935	20	GGAGAGACCAGAGGAGGCTT	59.952	20	247	1035	1281	gi|348533732|ref|XP_003454359.1|	182	5e-44	PREDICTED: N-alpha-acetyltransferase 15, NatA auxiliary subunit isoform 2 [Oreochromis niloticus]	sp|Q5R4J9|NAA15_PONAB	160	3e-38	N-alpha-acetyltransferase 15, NatA auxiliary subunit OS=Pongo abelii GN=NAA15 PE=2 SV=1	YDL040c	61.2	4e-09	COG0457	FOG: TPR repeat	K00670
Unigene0019611	2	p2	(GT)10	20	164	183	TTAACCGGAGGACGAAACAG	60.103	20	GCCCTTCATTAGCTCCTCCT	59.811	20	256	92	347	CCACCGTCTCAAGGACACTT	60.151	20	GCCCTTCATTAGCTCCTCCT	59.811	20	280	68	347	TTAACCGGAGGACGAAACAG	60.103	20	ATTGGCTGAGCCCTTCATTA	59.668	20	265	92	356	--	--	--	--	--	--	--	--	--	--	--	--	--	--
Unigene0019671	1	p2	(GT)9	18	69	86	TCCAGCACCGTCTCTCTGTA	59.571	20	ATTAATCCCCGCTTGCTCTT	60.061	20	118	4	121	TCCAGCACCGTCTCTCTGTA	59.571	20	AAGATTAATCCCCGCTTGCT	60.061	20	121	4	124	GTTTCCAGCACCGTCTCTCT	59.455	20	ATTAATCCCCGCTTGCTCTT	60.061	20	121	1	121	gi|348533598|ref|XP_003454292.1|	388	1e-106	PREDICTED: transforming protein RhoA-like [Oreochromis niloticus]	sp|P61589|RHOA_RAT	377	1e-103	Transforming protein RhoA OS=Rattus norvegicus GN=Rhoa PE=1 SV=1	SPAC16A10.04	220	7e-57	COG1100	GTPase SAR1 and related small G proteins	K04513
Unigene0019792	1	p2	(GT)10	20	198	217	ACAGTCACGCAATAAGCGAG	59.101	20	AGACTGGGAGGGAACCAAAT	59.795	20	161	140	300	ACAGTCACGCAATAAGCGAG	59.101	20	TTGTTCAGAGACTGGGAGGG	60.229	20	169	140	308	ACAGTCACGCAATAAGCGAG	59.101	20	AGCTATCAGCCAGTTGTGGG	60.277	20	225	140	364	--	--	--	--	--	--	--	--	--	--	--	--	--	--
Unigene0019874	1	p2	(CA)9	18	4524	4541	ACTGTGACAACCCCTCGAAC	60.009	20	GGCCAGTGCCGTAGTTATGT	60.022	20	200	4408	4607	GACAGCCTGGACTTGGTCAT	60.12	20	GGCCAGTGCCGTAGTTATGT	60.022	20	264	4344	4607	ACTGTGACAACCCCTCGAAC	60.009	20	CTGGCCAGTGCCGTAGTTAT	60.154	20	202	4408	4609	gi|348502717|ref|XP_003438914.1|	1506	0	PREDICTED: glutamate receptor-interacting protein 2-like [Oreochromis niloticus]	sp|A8E0R9|GRIP2_XENLA	1221	0	Glutamate receptor-interacting protein 2 OS=Xenopus laevis GN=grip2 PE=2 SV=2	--	--	--	--	--	--
Unigene0020026	1	p2	(CT)11	22	2256	2277	GAGTCAACTGCCCCAATGAT	59.934	20	TTCCCATGGTGCCTTTAGAC	59.933	20	250	2072	2321	GAGTCAACTGCCCCAATGAT	59.934	20	GCCTTTAGACGGAGGGACTC	60.212	20	240	2072	2311	GAGTCAACTGCCCCAATGAT	59.934	20	TTTCCCATGGTGCCTTTAGA	60.439	20	251	2072	2322	gi|348531764|ref|XP_003453378.1|	561	1e-157	PREDICTED: dynamin-3-like [Oreochromis niloticus]	sp|Q08877|DYN3_RAT	528	8e-149	Dynamin-3 OS=Rattus norvegicus GN=Dnm3 PE=1 SV=2	SPAC767.01c	360	8e-99	COG0699	Predicted GTPases (dynamin-related)	K01528
Unigene0022151	1	p2	(AC)9	18	432	449	ATCGCCACCTTTCAGACAAC	60.119	20	GAGGAAGAGGAGGAGGAGGA	59.883	20	274	356	629	AGAGACGGCATCGTCAAAGT	59.874	20	GAGGAAGAGGAGGAGGAGGA	59.883	20	229	401	629	AGACGGCATCGTCAAAGTCT	59.874	20	GAGGAAGAGGAGGAGGAGGA	59.883	20	227	403	629	gi|348527536|ref|XP_003451275.1|	203	3e-50	PREDICTED: phosphoinositide 3-kinase regulatory subunit 4 [Oreochromis niloticus]	sp|Q5R9I3|PI3R4_PONAB	160	4e-38	Phosphoinositide 3-kinase regulatory subunit 4 OS=Pongo abelii GN=PIK3R4 PE=2 SV=3	--	--	--	--	--	K08333
Unigene0022855	1	p2	(AC)10	20	2564	2583	ACCAACCTCCAAGGAGACCT	59.968	20	TGGTTGAACCCTTGTGACTG	59.565	20	206	2408	2613	CCTCTCATCCTCTGCTGACC	59.945	20	TGGTTGAACCCTTGTGACTG	59.565	20	102	2512	2613	TCTCCCCTGGAGCACATTAC	60.073	20	TGGTTGAACCCTTGTGACTG	59.565	20	262	2352	2613	gi|348500883|ref|XP_003438001.1|	1679	0	PREDICTED: WD repeat-containing protein 47-like [Oreochromis niloticus]	sp|Q8CGF6|WDR47_MOUSE	1315	0	WD repeat-containing protein 47 OS=Mus musculus GN=Wdr47 PE=1 SV=2	all0438_2	92.8	3e-18	COG2319	FOG: WD40 repeat	--
Unigene0022967	2	p2	(GT)10	20	684	703	GAGAGGTTTCCAAGCTGCAC	59.997	20	CTGCAGGCTGTTCATTTCAA	59.988	20	130	600	729	GAGAGGTTTCCAAGCTGCAC	59.997	20	CGCACCTCTCATGTTGAAGA	59.984	20	211	600	810	GAGAGGTTTCCAAGCTGCAC	59.997	20	CTCGCACCTCTCATGTTGAA	59.984	20	213	600	812	gi|194853650|ref|XP_001968200.1|	126	2e-27	GG24735 [Drosophila erecta] >gi|190660067|gb|EDV57259.1| GG24735 [Drosophila erecta]	sp|Q07283|TRHY_HUMAN	87.8	1e-16	Trichohyalin OS=Homo sapiens GN=TCHH PE=1 SV=2	PA2976	66.2	1e-10	COG1530	Ribonucleases G and E	--
Unigene0024033	1	p2	(CA)9	18	597	614	ACGTTGATAGGCGGAATGAC	59.962	20	GACAAAGCACCTTTTCTGCC	59.859	20	215	431	645	TACCCGCTGAGTCAGTGTTG	59.897	20	TGGGAAGTGAACGTCAATCA	60.088	20	187	526	712	TACCCGCTGAGTCAGTGTTG	59.897	20	GACAAAGCACCTTTTCTGCC	59.859	20	120	526	645	gi|348530126|ref|XP_003452562.1|	365	1e-99	PREDICTED: cadherin-2-like [Oreochromis niloticus]	sp|Q90275|CADH2_DANRE	289	2e-77	Cadherin-2 OS=Danio rerio GN=cdh2 PE=2 SV=2	--	--	--	--	--	K06736
Unigene0024077	1	p2	(CA)10	20	102	121	ACCCTCCAGCCTTCTTCACT	60.252	20	GTTCGCCCTTGAAAAACAAG	59.724	20	183	5	187	ACCCTCCAGCCTTCTTCACT	60.252	20	ATGTTCGCCCTTGAAAAACA	60.481	20	185	5	189	ACCCTCCAGCCTTCTTCACT	60.252	20	CATGTTCGCCCTTGAAAAAC	60.481	20	186	5	190	--	--	--	--	--	--	--	--	--	--	--	--	--	--
Unigene0024785	1	p2	(GT)9	18	577	594	CCCCACACAGACACACAAAA	60.454	20	GAATCATGAGCCTCGACACA	59.794	20	250	382	631	CCCCCAGTTCAGAACAACAG	60.536	20	GAATCATGAGCCTCGACACA	59.794	20	189	443	631	CCCCAGTTCAGAACAACAGG	60.536	20	GAATCATGAGCCTCGACACA	59.794	20	188	444	631	gi|318179348|ref|NP_001187676.1|	140	2e-31	coagulation factor VII precursor [Ictalurus punctatus] >gi|308323671|gb|ADO28971.1| coagulation factor VII [Ictalurus punctatus]	sp|A6MFK8|FAXD2_DEMVE	86.3	5e-16	Vestarin-D2 OS=Demansia vestigiata PE=1 SV=1	--	--	--	--	--	K01320
Unigene0025019	2	p2	(TG)9	18	444	461	CTCAGAGTCAATCTTGGGCA	58.957	20	GTCCTCGGTGCTAAATGGTC	59.556	20	249	357	605	ACTCAGAGTCAATCTTGGGCA	59.859	21	GTCCTCGGTGCTAAATGGTC	59.556	20	250	356	605	CCATGTGCATGACATTGAACT	59.435	21	GTCCTCGGTGCTAAATGGTC	59.556	20	268	338	605	--	--	--	--	--	--	--	--	--	--	--	--	--	--
Unigene0025019	3	p2	(AC)9	18	1568	1585	GTCCTCGGTGCTAAATGGTC	59.556	20	CTCAGAGTCAATCTTGGGCA	58.957	20	249	1423	1671	GTCCTCGGTGCTAAATGGTC	59.556	20	ACTCAGAGTCAATCTTGGGCA	59.859	21	250	1423	1672	TTCTTCTCGGATAAATGCTGC	59.447	21	ACTGACAGTCCCTCTGGCAT	59.713	20	273	1544	1816	--	--	--	--	--	--	--	--	--	--	--	--	--	--
Unigene0025315	2	p2	(GT)9	18	471	488	GGTCGTCGTACCCAATCAGT	59.851	20	CACTACCACTGCTCAGCCAA	60.049	20	280	388	667	GGTCGTCGTACCCAATCAGT	59.851	20	CACTGCTCAGCCAATCAGAA	60.136	20	274	388	661	TCGTCGTACCCAATCAGTTG	59.566	20	CACTACCACTGCTCAGCCAA	60.049	20	278	390	667	gi|348500785|ref|XP_003437953.1|	187	8e-46	PREDICTED: dipeptidyl aminopeptidase-like protein 6-like [Oreochromis niloticus]	sp|Q5IS50|DPP6_PANTR	159	3e-38	Dipeptidyl aminopeptidase-like protein 6 OS=Pan troglodytes GN=DPP6 PE=2 SV=1	--	--	--	--	--	--
Unigene0025710	1	p2	(AC)9	18	39	56	TCTGCACATAAACCTGCACAT	59.213	21	CCCTCCCTCTCTTGTTTTCC	60.045	20	141	13	153	TCTGCACATAAACCTGCACAT	59.213	21	TCTGGGGATGAACTCTGACC	60.048	20	182	13	194	TCTGCACATAAACCTGCACAT	59.213	21	TGGGGATGAACTCTGACCTC	60.048	20	180	13	192	--	--	--	--	--	--	--	--	--	--	--	--	--	--
Unigene0026053	1	p2	(AC)10	20	102	121	CATTATTACATGTTCAGATGCCG	59.398	23	TGCACAGAAACAAAGGAGGA	59.415	20	167	76	242	CATTATTACATGTTCAGATGCCG	59.398	23	TGCACAGAAACAAAGGAGGAC	60.284	21	167	76	242	CATTATTACATGTTCAGATGCCG	59.398	23	CTGCACAGAAACAAAGGAGGA	60.416	21	168	76	243	--	--	--	--	--	--	--	--	--	--	--	--	--	--
Unigene0027426	2	c	(TG)7cgta(TG)10	38	131	168	GGTCCACATAAAGGGAGCAA	59.933	20	TAATGCTCTTCGGATGTCCC	60.036	20	196	102	297	GGTCCACATAAAGGGAGCAA	59.933	20	TTATTGTCAGAAGGGCAGGG	60.066	20	231	102	332	CTGTCTCTCAGGGTTCAGGG	59.828	20	TAATGCTCTTCGGATGTCCC	60.036	20	262	36	297	gi|357197094|tpg|DAA35001.1|	53.1	4e-06	TPA_exp: minicollagen 1 [Hydractinia echinata]	sp|P12978|EBNA2_EBVB9	50.4	4e-06	Epstein-Barr nuclear antigen 2 OS=Epstein-Barr virus (strain B95-8) GN=EBNA2 PE=1 SV=1	CC3494_1	47.4	9e-06	COG3637	Opacity protein and related surface antigens	--
Unigene0027595	2	p2	(TG)10	20	132	151	TCTCTTTAACCGATGCCACC	60.074	20	CTGCTACTGTTGACAGGCCA	60.049	20	137	104	240	TCTCTTTAACCGATGCCACC	60.074	20	CCACTGTCCGACCTCTCATT	60.112	20	194	104	297	TCTCTTTAACCGATGCCACC	60.074	20	GAGCAATTACGCCATTCACA	59.694	20	276	104	379	--	--	--	--	--	--	--	--	--	--	--	--	--	--
Unigene0040864	2	p6	(CAGCTC)12	72	9495	9566	CTTCTTCTTCCTGCCCTGTG	59.982	20	CCCTGGATAGGGATCTGGTT	60.147	20	230	9462	9691	CTCCTTCTTCTTCCTGCCCT	59.95	20	CCCTGGATAGGGATCTGGTT	60.147	20	233	9459	9691	CTTCTTCTTCCTGCCCTGTG	59.982	20	GCTTCAACTCCATGGCTGAT	60.226	20	260	9462	9721	gi|221104693|ref|XP_002168168.1|	197	3e-58	PREDICTED: similar to expressed protein, partial [Hydra magnipapillata]	sp|Q9FPQ6|GP1_CHLRE	59.7	1e-11	Vegetative cell wall protein gp1 OS=Chlamydomonas reinhardtii GN=GP1 PE=2 SV=1	XF0818	57	1e-08	COG2730	Endoglucanase	--
Unigene0040865	2	p6	(CAGCTC)18	108	8470	8577	CTTCTTCTTCCTGCCCTGTG	59.982	20	CCCTGGATAGGGATCTGGTT	60.147	20	266	8437	8702	CTCCTTCTTCTTCCTGCCCT	59.95	20	CCCTGGATAGGGATCTGGTT	60.147	20	269	8434	8702	CTTCTTCTTCCTGCCCTGTG	59.982	20	GGTCTGGATCTGGAGCTGAA	60.349	20	188	8437	8624	gi|221104693|ref|XP_002168168.1|	247	1e-62	PREDICTED: similar to expressed protein, partial [Hydra magnipapillata]	sp|P05790|FIBH_BOMMO	92.8	4e-17	Fibroin heavy chain OS=Bombyx mori GN=FIBH PE=1 SV=4	XF0818	72.4	1e-11	COG2730	Endoglucanase	--
Unigene0040869	2	p6	(CAGCTC)14	84	9220	9303	CTTCTTCTTCCTGCCCTGTG	59.982	20	CCCTGGATAGGGATCTGGTT	60.147	20	242	9187	9428	CTCCTTCTTCTTCCTGCCCT	59.95	20	CCCTGGATAGGGATCTGGTT	60.147	20	245	9184	9428	CTTCTTCTTCCTGCCCTGTG	59.982	20	GCTTCAACTCCATGGCTGAT	60.226	20	272	9187	9458	gi|326431928|gb|EGD77498.1|	223	2e-55	serine/threonine protein kinase [Salpingoeca sp. ATCC 50818]	sp|P05790|FIBH_BOMMO	80.1	3e-13	Fibroin heavy chain OS=Bombyx mori GN=FIBH PE=1 SV=4	XF0818	62.8	2e-10	COG2730	Endoglucanase	--
Unigene0041000	1	p3	(GCG)18	54	908	961	AGGACCTCATGTCAAAACCG	59.966	20	GACCCCAGGGACTCCTACTC	59.929	20	220	839	1058	GGTGGACTGGTAATGCAGGT	59.851	20	GACCCCAGGGACTCCTACTC	59.929	20	240	819	1058	AGGACCTCATGTCAAAACCG	59.966	20	GAGTCGAGTCAGTGCGACAA	60.187	20	247	839	1085	gi|221047997|gb|ACL98106.1|	564	1e-159	CCAAT/enhancer-binding protein beta 2 [Epinephelus coioides]	sp|Q05826|CEBPB_CHICK	166	4e-40	CCAAT/enhancer-binding protein beta OS=Gallus gallus GN=CEBPB PE=2 SV=1	CC3494_1	54.7	5e-07	COG3637	Opacity protein and related surface antigens	K10048
Unigene0041000	2	p3	(CTG)20	60	1180	1239	GTTCTCCGCAAGGAAATCTG	59.813	20	CTCTTACTGGAGGCTCGGTG	60.005	20	232	1146	1377	TGTTCTCCGCAAGGAAATCT	59.813	20	CTCTTACTGGAGGCTCGGTG	60.005	20	233	1145	1377	ATCTTGTTCTCCGCAAGGAA	59.813	20	CTCTTACTGGAGGCTCGGTG	60.005	20	237	1141	1377	gi|221047997|gb|ACL98106.1|	564	1e-159	CCAAT/enhancer-binding protein beta 2 [Epinephelus coioides]	sp|Q05826|CEBPB_CHICK	166	4e-40	CCAAT/enhancer-binding protein beta OS=Gallus gallus GN=CEBPB PE=2 SV=1	CC3494_1	54.7	5e-07	COG3637	Opacity protein and related surface antigens	K10048
Unigene0041030	1	p2	(GT)9	18	577	594	CCCCACACAGACACACAAAA	60.454	20	GAATCATGAGCCTCGACACA	59.794	20	250	382	631	CCCCCAGTTCAGAACAACAG	60.536	20	GAATCATGAGCCTCGACACA	59.794	20	189	443	631	CCCCAGTTCAGAACAACAGG	60.536	20	GAATCATGAGCCTCGACACA	59.794	20	188	444	631	gi|74095907|ref|NP_001027780.1|	204	7e-51	coagulation factor VIIb precursor [Takifugu rubripes] >gi|28194020|gb|AAO33369.1|AF465274_1 coagulation factor VIIb precursor [Takifugu rubripes]	sp|Q2F9P2|FA7_PANTR	115	1e-24	Coagulation factor VII OS=Pan troglodytes GN=F7 PE=3 SV=1	--	--	--	--	--	K01320
Unigene0041064	1	p2	(CA)9	18	1166	1183	CAACACCATCACCTCACCTG	59.997	20	CTCTTAGTTTCAGCGTCCCG	60.008	20	234	1115	1348	GTGCAACACCATCACCTCAC	60.013	20	CTCTTAGTTTCAGCGTCCCG	60.008	20	237	1112	1348	GTCCACAGTGCAACACCATC	60.013	20	CTCTTAGTTTCAGCGTCCCG	60.008	20	244	1105	1348	gi|348537478|ref|XP_003456221.1|	546	1e-153	PREDICTED: E3 ubiquitin-protein ligase RNF220 [Oreochromis niloticus]	sp|Q5VTB9|RN220_HUMAN	414	2e-114	E3 ubiquitin-protein ligase RNF220 OS=Homo sapiens GN=RNF220 PE=1 SV=1	--	--	--	--	--	--
Unigene0041661	1	p2	(GT)9	18	500	517	GCGGCTGTGACTTTTACACA	59.911	20	TGTTTGTTGTGTGTCCAGCA	59.751	20	211	366	576	TGGACACAGACGAAGAGCTG	60.178	20	TGTTTGTTGTGTGTCCAGCA	59.751	20	233	344	576	GCGGCTGTGACTTTTACACA	59.911	20	CCTGTGTTGAATTGTTGCGT	59.615	20	237	366	602	--	--	--	--	--	--	--	--	--	--	--	--	--	--
Unigene0041711	1	p2	(AC)9	18	84	101	GATGAGCTGAGACTGAGGGG	59.945	20	GGAAGCGAAATAAATGGCAA	60.04	20	202	18	219	ATGAGCTGAGACTGAGGGGA	59.945	20	GGAAGCGAAATAAATGGCAA	60.04	20	201	19	219	GTGTGTGACTGCAGCCTGAT	59.905	20	GGAAGCGAAATAAATGGCAA	60.04	20	159	61	219	gi|194452381|gb|ACF71410.1|	204	1e-50	spidroin 2 [Avicularia juruensis]	sp|Q8T4N5|TSEP_GLOPP	193	3e-48	Protein TsetseEP OS=Glossina palpalis palpalis PE=4 SV=1	XF0818	122	2e-27	COG2730	Endoglucanase	K05185
Unigene0041897	1	p2	(TG)11	22	27	48	TGTGTGCATCATGTGTGTGTT	59.475	21	AGGAGGAGGAAGGAGAGCAC	59.952	20	217	0	216	TGTGTGCATCATGTGTGTGTT	59.475	21	TCAGCGTACACACAGCTTCC	60.056	20	125	0	124	TGTGTGCATCATGTGTGTGTT	59.475	21	GAGGAGGAGGAGGAAGGAGA	59.883	20	221	0	220	gi|348521950|ref|XP_003448489.1|	534	1e-150	PREDICTED: heterogeneous nuclear ribonucleoproteins C1/C2-like [Oreochromis niloticus]	sp|Q9Z204|HNRPC_MOUSE	326	2e-88	Heterogeneous nuclear ribonucleoproteins C1/C2 OS=Mus musculus GN=Hnrnpc PE=1 SV=1	YJL115w	53.9	6e-07	COG5137	Histone chaperone involved in gene silencing	K12884
Unigene0043155	1	p2	(GT)9	18	69	86	TCCAGCACCGTCTCTCTGTA	59.571	20	ATTAATCCCCGCTTGCTCTT	60.061	20	118	4	121	TCCAGCACCGTCTCTCTGTA	59.571	20	AAGATTAATCCCCGCTTGCT	60.061	20	121	4	124	TCCAGCACCGTCTCTCTGTA	59.571	20	TCTGGGAACTGGTCTTTGCT	59.844	20	248	4	251	gi|348521482|ref|XP_003448255.1|	389	1e-106	PREDICTED: transforming protein RhoA-like [Oreochromis niloticus]	sp|P61589|RHOA_RAT	370	1e-101	Transforming protein RhoA OS=Rattus norvegicus GN=Rhoa PE=1 SV=1	SPAC16A10.04	219	9e-57	COG1100	GTPase SAR1 and related small G proteins	K04513
Unigene0045377	1	p2	(AC)11	22	25	46	TGGACACACACATGATGCAC	60.008	20	CCGTGCTTCTCTTGGTTGAT	60.255	20	111	2	112	TGGACACACACATGATGCAC	60.008	20	CCGTGCTTCTCTTGGTTGA	59.968	19	111	2	112	TGGACACACACATGATGCAC	60.008	20	GTGAGCCCGTGCTTCTCTT	60.549	19	117	2	118	gi|167536463|ref|XP_001749903.1|	57	3e-07	hypothetical protein [Monosiga brevicollis MX1] >gi|163771618|gb|EDQ85282.1| predicted protein [Monosiga brevicollis MX1]	--	--	--	--	--	--	--	--	--	--
Unigene0052965	1	p2	(TG)9	18	45	62	CCATCGACTGGCTTTGATTT	60.074	20	GTTTGACGACATTAGCGCCT	60.278	20	151	6	156	CCATCGACTGGCTTTGATTT	60.074	20	TTGACGACATTAGCGCCTCT	60.934	20	149	6	154	CCATCGACTGGCTTTGATTT	60.074	20	TTGACGACATTAGCGCCTC	59.964	19	149	6	154	gi|261331295|emb|CBH14285.1|	62.8	5e-09	T. brucei spp.-specific protein [Trypanosoma brucei gambiense DAL972]	sp|Q69566|U88_HHV6U	63.2	5e-10	Uncharacterized protein U88 OS=Human herpesvirus 6A (strain Uganda-1102) GN=U88 PE=4 SV=1	--	--	--	--	--	--
Unigene0054279	1	p2	(GT)9	18	150	167	GTGTGTGCATGTGTGTGCAT	60.088	20	GCACCTCTTTCAAACAGTACCC	60.04	22	198	6	203	GTGTGTGCATGTGTGTGCAT	60.088	20	CACCTCTTTCAAACAGTACCCA	59.142	22	197	6	202	GTGTGTGCATGTGTGTGCAT	60.088	20	CACCTCTTTCAAACAGTACCCAC	59.95	23	197	6	202	--	--	--	--	--	--	--	--	--	--	--	--	--	--
Unigene0057119	2	p2	(AC)9	18	186	203	ACAGATGACAACGAGGGAGG	60.112	20	ACATTCAGGTGAGAGCTGCC	60.418	20	188	56	243	GATGACAACGAGGGAGGAGA	60.199	20	ACATTCAGGTGAGAGCTGCC	60.418	20	185	59	243	CAACAGATGACAACGAGGGA	59.676	20	ACATTCAGGTGAGAGCTGCC	60.418	20	190	54	243	--	--	--	--	--	--	--	--	--	--	--	--	--	--
Unigene0062327	1	p2	(AC)9	18	809	826	CATGACCAACACCAGAGACG	60.154	20	TCGTGAACAAACTGACGCTC	60.032	20	240	757	996	ACCCAACCTCAGATGACGAC	59.969	20	GAGCACTGGAAGACCAGGAC	59.841	20	205	714	918	ACCCAACCTCAGATGACGAC	59.969	20	CTCCCTGAGACCAGAACGAC	59.835	20	182	714	895	gi|45934578|gb|AAS79348.1|	434	1e-120	parkin [Takifugu rubripes]	sp|Q9JK66|PRKN2_RAT	307	9e-83	E3 ubiquitin-protein ligase parkin OS=Rattus norvegicus GN=Park2 PE=1 SV=1	SPAC6G10.11c_1	52.8	1e-06	COG5272	Ubiquitin	K04556
Unigene0063158	2	p2	(CA)9	18	155	172	ACCGGACAGTGAACGTTAGG	60.028	20	AGCAGCAATCTCTGCTGTCA	59.887	20	129	100	228	ACGTTAGGCCGCACTATCAG	60.292	20	AGCAGCAATCTCTGCTGTCA	59.887	20	117	112	228	ACCGGACAGTGAACGTTAGG	60.028	20	GGAGGAAAGGGTCAGACGTT	60.489	20	155	100	254	--	--	--	--	--	--	--	--	--	--	--	--	--	--
Unigene0065525	1	p2	(TG)9	18	300	317	TTCTGGTCCTGGTCCTGTTC	60.088	20	GGTCACCTGAGTCCTGGTGT	60.006	20	252	200	451	TTCTGGTCCTGGTCCTGTTC	60.088	20	TAGGGTCACCTGAGTCCTGG	60.104	20	255	200	454	TAGGCTGATTCTGGTCCTGG	60.21	20	GGTCACCTGAGTCCTGGTGT	60.006	20	260	192	451	gi|348524650|ref|XP_003449836.1|	680	0	PREDICTED: patatin-like phospholipase domain-containing protein 2-like [Oreochromis niloticus]	sp|P0C548|PLPL2_RAT	423	3e-117	Patatin-like phospholipase domain-containing protein 2 OS=Rattus norvegicus GN=Pnpla2 PE=2 SV=1	--	--	--	--	--	--
Unigene0067698	2	p2	(GT)9	18	2824	2841	AGGGAGGAGCAGGAGTGTTT	60.252	20	TTGACTGATGAACTGGCTGG	59.831	20	239	2696	2934	CTCCCAGATGCAGTGAAGGT	60.261	20	TTGACTGATGAACTGGCTGG	59.831	20	143	2792	2934	ACTCCCAGATGCAGTGAAGG	60.261	20	TTGACTGATGAACTGGCTGG	59.831	20	144	2791	2934	gi|348501492|ref|XP_003438303.1|	1450	0	PREDICTED: attractin-like protein 1-like [Oreochromis niloticus]	sp|Q6A051|ATRN1_MOUSE	1076	0	Attractin-like protein 1 OS=Mus musculus GN=Atrnl1 PE=1 SV=2	--	--	--	--	--	--
Unigene0069563	1	c	(CA)6gacg(CA)9	34	1628	1661	ATAGGAGCTGCCCTGTCCTT	60.233	20	GTCGAGGCCTGACTGACTGT	60.467	20	270	1572	1841	GGGTCTGTCCATAGGAGCTG	59.679	20	GTCGAGGCCTGACTGACTGT	60.467	20	280	1562	1841	CCTCTGAGGGCTCTGGTGTA	60.399	20	GTCGAGGCCTGACTGACTGT	60.467	20	249	1593	1841	gi|348541511|ref|XP_003458230.1|	744	0	PREDICTED: equilibrative nucleoside transporter 2-like [Oreochromis niloticus]	sp|O54699|S29A2_RAT	465	1e-129	Equilibrative nucleoside transporter 2 OS=Rattus norvegicus GN=Slc29a2 PE=2 SV=1	--	--	--	--	--	K15014
Unigene0073033	2	p2	(CA)9	18	1535	1552	CCTATCCCTTCCTCTCCCTG	60.023	20	CAGTTAATGGCTGGTGGGTT	59.853	20	269	1481	1749	CCTATCCCTTCCTCTCCCTG	60.023	20	ATATGGGGTGGAATGGTGTG	60.317	20	187	1481	1667	CCTATCCCTTCCTCTCCCTG	60.023	20	GCTGGTGGGTTTATAGGGCT	60.34	20	260	1481	1740	gi|348526151|ref|XP_003450584.1|	682	0	PREDICTED: cell adhesion molecule 4-like [Oreochromis niloticus]	sp|Q66KX2|CADM4_XENLA	471	8e-132	Cell adhesion molecule 4 OS=Xenopus laevis GN=cadm4 PE=2 SV=1	--	--	--	--	--	K06783
Unigene0073034	2	c	(CA)6tg(CA)9	32	351	382	GAAAGAAGACTGGTGGCAGC	59.997	20	CAGTTAATGGCTGGTGGGTT	59.853	20	276	304	579	GAAGACTGGTGGCAGCTCTC	60.143	20	CAGTTAATGGCTGGTGGGTT	59.853	20	272	308	579	GAAAGAAGACTGGTGGCAGC	59.997	20	ATATGGGGTGGAATGGTGTG	60.317	20	194	304	497	gi|261327641|emb|CBH10617.1|	63.2	8e-09	T. brucei spp.-specific protein [Trypanosoma brucei gambiense DAL972]	sp|Q69566|U88_HHV6U	60.1	1e-08	Uncharacterized protein U88 OS=Human herpesvirus 6A (strain Uganda-1102) GN=U88 PE=4 SV=1	--	--	--	--	--	--
Unigene0073037	1	c	(CA)6tg(CA)9	32	694	725	GAAAGAAGACTGGTGGCAGC	59.997	20	CAGTTAATGGCTGGTGGGTT	59.853	20	276	647	922	GAAGACTGGTGGCAGCTCTC	60.143	20	CAGTTAATGGCTGGTGGGTT	59.853	20	272	651	922	GAAAGAAGACTGGTGGCAGC	59.997	20	ATATGGGGTGGAATGGTGTG	60.317	20	194	647	840	gi|261327641|emb|CBH10617.1|	63.2	2e-08	T. brucei spp.-specific protein [Trypanosoma brucei gambiense DAL972]	sp|Q69566|U88_HHV6U	59.7	3e-08	Uncharacterized protein U88 OS=Human herpesvirus 6A (strain Uganda-1102) GN=U88 PE=4 SV=1	--	--	--	--	--	--
Unigene0076064	1	p2	(AG)11	22	2415	2436	AGTTCCCACAAAGAGCAAGC	59.478	20	GCTTGGAGAGCTGGTTTCTG	60.134	20	278	2252	2529	GGGGAGGAAAAACTCCCTTT	60.637	20	GCTTGGAGAGCTGGTTTCTG	60.134	20	245	2285	2529	ACCGGTTGGGTTTAGGAGAA	60.714	20	GCTTGGAGAGCTGGTTTCTG	60.134	20	172	2358	2529	gi|348531446|ref|XP_003453220.1|	759	0	PREDICTED: polypyrimidine tract-binding protein 2-like [Oreochromis niloticus]	sp|Q9UKA9|PTBP2_HUMAN	568	1e-175	Polypyrimidine tract-binding protein 2 OS=Homo sapiens GN=PTBP2 PE=1 SV=1	--	--	--	--	--	K14948
Unigene0076065	2	p2	(AG)11	22	1959	1980	AGTTCCCACAAAGAGCAAGC	59.478	20	GCTTGGAGAGCTGGTTTCTG	60.134	20	278	1796	2073	GGGGAGGAAAAACTCCCTTT	60.637	20	GCTTGGAGAGCTGGTTTCTG	60.134	20	245	1829	2073	ACCGGTTGGGTTTAGGAGAA	60.714	20	GCTTGGAGAGCTGGTTTCTG	60.134	20	172	1902	2073	gi|348540154|ref|XP_003457553.1|	231	3e-75	PREDICTED: polypyrimidine tract-binding protein 2-like [Oreochromis niloticus]	sp|Q66H20|PTBP2_RAT	227	2e-73	Polypyrimidine tract-binding protein 2 OS=Rattus norvegicus GN=Ptbp2 PE=2 SV=1	--	--	--	--	--	K14948
Unigene0076072	1	p6	(CAGCAT)11	66	855	920	TTGAGTTCACCCTGAGGGAC	60.088	20	TCCTGATCCCACTCTATGGC	60.034	20	208	832	1039	CAAATGAACGCTGCACAACT	59.911	20	TCCTGATCCCACTCTATGGC	60.034	20	258	782	1039	ACAAATGAACGCTGCACAAC	59.77	20	TCCTGATCCCACTCTATGGC	60.034	20	259	781	1039	gi|292623403|ref|XP_002665292.1|	115	1e-23	PREDICTED: urokinase plasminogen activator surface receptor-like [Danio rerio]	sp|Q8GUC3|BBR_HORVU	66.6	1e-09	Protein Barley B recombinant OS=Hordeum vulgare GN=BBR PE=1 SV=1	--	--	--	--	--	--
Unigene0076192	1	p2	(CA)9	18	1350	1367	CAACACCATCACCTCACCTG	59.997	20	CTCTTAGTTTCAGCGTCCCG	60.008	20	234	1299	1532	GTGCAACACCATCACCTCAC	60.013	20	CTCTTAGTTTCAGCGTCCCG	60.008	20	237	1296	1532	GTCCACAGTGCAACACCATC	60.013	20	CTCTTAGTTTCAGCGTCCCG	60.008	20	244	1289	1532	gi|348537478|ref|XP_003456221.1|	438	1e-121	PREDICTED: E3 ubiquitin-protein ligase RNF220 [Oreochromis niloticus]	sp|Q08DV5|RN220_BOVIN	313	3e-84	E3 ubiquitin-protein ligase RNF220 OS=Bos taurus GN=RNF220 PE=2 SV=1	--	--	--	--	--	--
Unigene0076193	2	p2	(CA)9	18	255	272	CAACACCATCACCTCACCTG	59.997	20	CTCTTAGTTTCAGCGTCCCG	60.008	20	234	204	437	GTGCAACACCATCACCTCAC	60.013	20	CTCTTAGTTTCAGCGTCCCG	60.008	20	237	201	437	GTCCACAGTGCAACACCATC	60.013	20	CTCTTAGTTTCAGCGTCCCG	60.008	20	244	194	437	gi|348537478|ref|XP_003456221.1|	116	2e-24	PREDICTED: E3 ubiquitin-protein ligase RNF220 [Oreochromis niloticus]	sp|Q6PDX6|RN220_MOUSE	110	2e-23	E3 ubiquitin-protein ligase Rnf220 OS=Mus musculus GN=Rnf220 PE=1 SV=1	--	--	--	--	--	--
Unigene0076442	1	p2	(GT)9	18	2278	2295	GGTCGTTAACCTGTGCCTGT	60.035	20	TTTCTCAAATGAGCGCGTTA	59.585	20	280	2148	2427	ACCTGTGCCTGTATGGTGGT	60.307	20	TTTCTCAAATGAGCGCGTTA	59.585	20	272	2156	2427	GCCTGTATGGTGGTGAACAA	59.42	20	TTTCTCAAATGAGCGCGTTA	59.585	20	266	2162	2427	gi|256665402|gb|ACV04846.1|	1028	0	tumor necrosis factor receptor-associated factor 2 [Oplegnathus fasciatus]	sp|P39429|TRAF2_MOUSE	613	3e-174	TNF receptor-associated factor 2 OS=Mus musculus GN=Traf2 PE=1 SV=1	SPAC1687.12c	126	4e-28	COG5031	Uncharacterized protein involved in ubiquinone biosynthesis	K03173
Unigene0076635	1	p2	(GA)11	22	632	653	CTACGCTAAAGCCATGAGGC	60.003	20	GGAACAGAGAGCTGGTGGAG	59.986	20	227	518	744	CTACGCTAAAGCCATGAGGC	60.003	20	AGGAACAGAGAGCTGGTGGA	59.986	20	228	518	745	GAAGTACGTGGCCTCTCTGC	60.02	20	GGAACAGAGAGCTGGTGGAG	59.986	20	143	602	744	gi|348539526|ref|XP_003457240.1|	342	4e-92	PREDICTED: 1,2-dihydroxy-3-keto-5-methylthiopentene dioxygenase-like [Oreochromis niloticus]	sp|F7FKV1|MTND_MONDO	291	8e-78	1,2-dihydroxy-3-keto-5-methylthiopentene dioxygenase OS=Monodelphis domestica GN=ADI1 PE=3 SV=1	YMR009w	128	4e-29	COG1791	Uncharacterized conserved protein, contains double-stranded beta-helix domain	K08967
Unigene0077363	1	p6	(AGGGTT)21	126	218	343	TGCAGGATTGTTTTTCTTCAAA	59.736	22	CCAGTGCTGACACCTGCTAC	59.493	20	245	178	422	TGCAGGATTGTTTTTCTTCAAA	59.736	22	ACCAGTGCTGACACCTGCTA	59.493	20	246	178	423	TGCAGGATTGTTTTTCTTCAAA	59.736	22	AGACACACACCTGCACCAGT	59.197	20	260	178	437	gi|146184580|ref|XP_001029661.2|	114	2e-24	IBR domain containing protein [Tetrahymena thermophila] >gi|146142628|gb|EAR81998.2| IBR domain containing protein [Tetrahymena thermophila SB210]	sp|P26694|CSP_PLARE	81.3	2e-15	Circumsporozoite protein OS=Plasmodium reichenowi PE=3 SV=1	BH0971	62	4e-10	COG1511	Predicted membrane protein	--
Unigene0077740	2	c	(TG)6agaaaa(TG)9	36	148	183	GAAGAGGGAGACTGCTGTGG	59.986	20	TTCTCAGATCAGCCCTGTCC	60.349	20	246	17	262	AGAGGGAGACTGCTGTGGAA	59.986	20	TTCTCAGATCAGCCCTGTCC	60.349	20	244	19	262	AAGAGGGAGACTGCTGTGGA	59.986	20	TTCTCAGATCAGCCCTGTCC	60.349	20	245	18	262	gi|326669462|ref|XP_001922445.2|	224	1e-56	PREDICTED: diacylglycerol kinase zeta [Danio rerio]	sp|Q80UP3|DGKZ_MOUSE	196	1e-48	Diacylglycerol kinase zeta OS=Mus musculus GN=Dgkz PE=1 SV=2	--	--	--	--	--	K00901
Unigene0078011	2	c	(GT)6ggaacccctgatatgcaaaaaaaaaaagcgaa(AC)10	64	440	503	TCAGCAAAAACGTGTGAACC	59.74	20	GTCGGGAGCCATGAGTACAT	59.957	20	276	379	654	ACGAAGGCTCTTCAGCAAAA	60.132	20	GAAGCGGCCAGTTTGTTTTA	60.244	20	230	368	597	TCAGCAAAAACGTGTGAACC	59.74	20	AGGCCTACAACAGGGGTTTT	59.864	20	172	379	550	--	--	--	--	--	--	--	--	--	--	--	--	--	--
Unigene0079483	1	p2	(GT)9	18	160	177	GGTCTCAAATACCACGTGCC	60.384	20	CGTCTCTGGAGGTTCTGAGG	59.978	20	243	105	347	GGTCTCAAATACCACGTGCC	60.384	20	ATGAAGGACTGGACCGTCTG	60.112	20	214	105	318	GGTCAGTGCTCCTCGGATAA	60.218	20	ACGTAGCTTCACCAGCCAAC	60.321	20	209	22	230	--	--	--	--	--	--	--	--	--	--	--	--	--	--
Unigene0080292	1	p2	(CT)11	22	2210	2231	GAGTCAACTGCCCCAATGAT	59.934	20	TTTCCCATTGCTGCTTTTCT	59.823	20	276	2026	2301	GAGTCAACTGCCCCAATGAT	59.934	20	TCTACATGGTGGTCTTCCCC	59.779	20	236	2026	2261	GAGTCAACTGCCCCAATGAT	59.934	20	CCCATTGCTGCTTTTCTGTT	60.249	20	273	2026	2298	gi|348534202|ref|XP_003454592.1|	2173	0	PREDICTED: plasma membrane calcium-transporting ATPase 2-like isoform 1 [Oreochromis niloticus]	sp|P58165|AT2B2_OREMO	2146	0	Plasma membrane calcium-transporting ATPase 2 (Fragment) OS=Oreochromis mossambicus GN=atp2b2 PE=2 SV=1	MTH1001	334	1e-90	COG0474	Cation transport ATPase	K05850
Unigene0080715	1	p2	(AC)9	18	271	288	CAACCAGGCAACGAGGTAAT	59.993	20	CGTGCCACACAGTTAGCATT	59.788	20	217	119	335	CAACCAGGCAACGAGGTAAT	59.993	20	TCCTTCGTGCCACACAGTTA	60.301	20	222	119	340	CAACCAGGCAACGAGGTAAT	59.993	20	TCGTGCCACACAGTTAGCAT	60.333	20	218	119	336	gi|348513261|ref|XP_003444161.1|	114	1e-24	PREDICTED: rap guanine nucleotide exchange factor 5-like [Oreochromis niloticus]	sp|Q8C0Q9|RPGF5_MOUSE	75.1	2e-13	Rap guanine nucleotide exchange factor 5 OS=Mus musculus GN=Rapgef5 PE=2 SV=2	--	--	--	--	--	K08019
Unigene0081217	2	p6	(CAGCTC)18	108	10300	10407	CTTCTTCTTCCTGCCCTGTG	59.982	20	CCCTGGATAGGGATCTGGTT	60.147	20	266	10267	10532	CTCCTTCTTCTTCCTGCCCT	59.95	20	CCCTGGATAGGGATCTGGTT	60.147	20	269	10264	10532	CTTCTTCTTCCTGCCCTGTG	59.982	20	GGTCTGGATCTGGAGCTGAA	60.349	20	188	10267	10454	gi|326431928|gb|EGD77498.1|	200	2e-48	serine/threonine protein kinase [Salpingoeca sp. ATCC 50818]	sp|P05790|FIBH_BOMMO	92.8	5e-17	Fibroin heavy chain OS=Bombyx mori GN=FIBH PE=1 SV=4	XF0818	72.4	2e-11	COG2730	Endoglucanase	--
Unigene0081418	1	c	(GTG)7gttggggaggttgggtaggacac(AG)10	64	1031	1094	TGCTAGCCACCAGTCACAAC	59.905	20	AGCAGAAACCCAGTGTAGGC	59.357	20	264	890	1153	GTGCTAGCCACCAGTCACAA	59.905	20	AGCAGAAACCCAGTGTAGGC	59.357	20	265	889	1153	TGCTAGCCACCAGTCACAAC	59.905	20	GCAGAAACCCAGTGTAGGCT	59.357	20	263	890	1152	--	--	--	--	--	--	--	--	--	--	--	--	--	--
Unigene0082002	1	p2	(CA)9	18	1300	1317	GGGATGTGCACAGACAACAC	60.013	20	GTGCTGCAGCCTTGATGTAA	60.019	20	268	1240	1507	GGGATGTGCACAGACAACAC	60.013	20	TGCTGCAGCCTTGATGTAAC	60.019	20	267	1240	1506	GGGATGTGCACAGACAACAC	60.013	20	GAAGGCAGTAGTTTGCGACC	59.882	20	128	1240	1367	--	--	--	--	--	--	--	--	--	--	--	--	--	--
Unigene0082217	1	p2	(TG)10	20	89	108	AATAGGCCCTTGTCTCCACA	59.55	20	ACGTCATGGATAGGGCAAAG	59.955	20	184	0	183	AATAGGCCCTTGTCTCCACA	59.55	20	AGGGCAAAGCGAATGTCTTA	59.845	20	173	0	172	AATAGGCCCTTGTCTCCACA	59.55	20	TAGGGCAAAGCGAATGTCTT	59.845	20	174	0	173	--	--	--	--	--	--	--	--	--	--	--	--	--	--
Unigene0082694	2	p2	(TG)9	18	126	143	GCAGCTCAGTGCGTCATAAT	59.057	20	AATTTATGGACCAGAGGGGC	60.152	20	215	52	266	GCAGCTCAGTGCGTCATAAT	59.057	20	GCCCCCACCTATAAAATGCT	60.171	20	172	52	223	GCAGCTCAGTGCGTCATAAT	59.057	20	CAGTGCCCCCACCTATAAAA	59.817	20	176	52	227	gi|348501836|ref|XP_003438475.1|	1397	0	PREDICTED: tumor necrosis factor alpha-induced protein 3 [Oreochromis niloticus]	sp|P21580|TNAP3_HUMAN	631	1e-179	Tumor necrosis factor alpha-induced protein 3 OS=Homo sapiens GN=TNFAIP3 PE=1 SV=1	--	--	--	--	--	K11859
Unigene0083209	2	p2	(GT)10	20	166	185	TTAACCGGAGGACGAAACAG	60.103	20	GCCCTTCATTAGCTCCTCCT	59.811	20	256	94	349	CCACCGTCTCAAGGACACTT	60.151	20	GCCCTTCATTAGCTCCTCCT	59.811	20	280	70	349	TTAACCGGAGGACGAAACAG	60.103	20	ATTGGCTGAGCCCTTCATTA	59.668	20	265	94	358	--	--	--	--	--	--	--	--	--	--	--	--	--	--
Unigene0084386	1	c	(TC)8tgtgctcg(GT)9	42	36	77	GAGCACGGATCTTGTGTGAG	59.42	20	GGGGCAAGGAGAAAGCTAGT	59.848	20	218	4	221	GAGCACGGATCTTGTGTGAG	59.42	20	CCCTCCACACACTGCTGTTA	59.745	20	165	4	168	GAGCACGGATCTTGTGTGAG	59.42	20	ATGTCAGAGCAATGGAGGGA	60.622	20	134	4	137	--	--	--	--	--	--	--	--	--	--	--	--	--	--
Unigene0087151	1	p2	(TG)9	18	62	79	TTTTTCACATCAGTGTGTGTTGA	59.133	23	GATGGAAACAAGAAAAGCGG	59.685	20	171	36	206	TTTTTCACATCAGTGTGTGTTGA	59.133	23	AACGATTCACCCTGTGATGG	60.78	20	186	36	221	TTTTCACATCAGTGTGTGTTGA	57.635	22	GATGGAAACAAGAAAAGCGG	59.685	20	170	37	206	--	--	--	--	--	--	--	--	--	--	--	--	--	--
Unigene0087650	1	p2	(GT)9	18	126	143	AGGAAAGGAGCCTGGACAAT	60.074	20	TAGAAGCTGAGGCTTCCTGC	59.859	20	153	100	252	AGGAAAGGAGCCTGGACAAT	60.074	20	TAACGCTCCACAGTGTGTCC	59.751	20	227	100	326	AAGAGGAAAGGAGCCTGGAC	59.817	20	TAGAAGCTGAGGCTTCCTGC	59.859	20	156	97	252	--	--	--	--	--	--	--	--	--	--	--	--	--	--
Unigene0087955	1	p2	(CA)9	18	312	329	CCTTCCCTGTGGAGTGTGTT	60.002	20	TGAGTCATGGAGTCTGGCCT	60.829	20	158	203	360	CCTTCCCTGTGGAGTGTGTT	60.002	20	TTTGAGTCATGGAGTCTGGC	58.802	20	160	203	362	CCTTCCCTGTGGAGTGTGTT	60.002	20	CCTTTTGTGCATGAGTGTGTG	60.206	21	181	203	383	gi|261331295|emb|CBH14285.1|	53.5	3e-06	T. brucei spp.-specific protein [Trypanosoma brucei gambiense DAL972]	sp|Q69566|U88_HHV6U	57.4	3e-08	Uncharacterized protein U88 OS=Human herpesvirus 6A (strain Uganda-1102) GN=U88 PE=4 SV=1	--	--	--	--	--	--
Unigene0088790	1	p2	(CA)9	18	98	115	ACGTTAATGTCAGGGTGCGT	60.44	20	AAGCTCTGAATCCTCCCCTC	59.778	20	261	61	321	ACGTTAATGTCAGGGTGCGT	60.44	20	AGAAGCTCTGAATCCTCCCC	59.778	20	263	61	323	ACGTTAATGTCAGGGTGCGT	60.44	20	GAAGCTCTGAATCCTCCCCT	59.778	20	262	61	322	--	--	--	--	--	--	--	--	--	--	--	--	--	--
Unigene0090153	2	p6	(CAGCTC)10	60	9582	9641	CTTCTTCTTCCTGCCCTGTG	59.982	20	CCCTGGATAGGGATCTGGTT	60.147	20	218	9549	9766	CTCCTTCTTCTTCCTGCCCT	59.95	20	CCCTGGATAGGGATCTGGTT	60.147	20	221	9546	9766	CTTCTTCTTCCTGCCCTGTG	59.982	20	GCTTCAACTCCATGGCTGAT	60.226	20	248	9549	9796	gi|221104693|ref|XP_002168168.1|	197	3e-58	PREDICTED: similar to expressed protein, partial [Hydra magnipapillata]	sp|Q9FPQ6|GP1_CHLRE	53.5	7e-10	Vegetative cell wall protein gp1 OS=Chlamydomonas reinhardtii GN=GP1 PE=2 SV=1	XF0818	52.4	2e-07	COG2730	Endoglucanase	--
Unigene0090156	2	p6	(CAGCTC)12	72	11047	11118	CTTCTTCTTCCTGCCCTGTG	59.982	20	CCCTGGATAGGGATCTGGTT	60.147	20	230	11014	11243	CTCCTTCTTCTTCCTGCCCT	59.95	20	CCCTGGATAGGGATCTGGTT	60.147	20	233	11011	11243	CTTCTTCTTCCTGCCCTGTG	59.982	20	GCTTCAACTCCATGGCTGAT	60.226	20	260	11014	11273	gi|326431928|gb|EGD77498.1|	223	2e-55	serine/threonine protein kinase [Salpingoeca sp. ATCC 50818]	sp|Q9FPQ6|GP1_CHLRE	59.7	1e-11	Vegetative cell wall protein gp1 OS=Chlamydomonas reinhardtii GN=GP1 PE=2 SV=1	XF0818	57	1e-08	COG2730	Endoglucanase	--
Unigene0090166	2	p6	(CAGCTC)10	60	11023	11082	CTTCTTCTTCCTGCCCTGTG	59.982	20	CCCTGGATAGGGATCTGGTT	60.147	20	218	10990	11207	CTCCTTCTTCTTCCTGCCCT	59.95	20	CCCTGGATAGGGATCTGGTT	60.147	20	221	10987	11207	CTTCTTCTTCCTGCCCTGTG	59.982	20	GCTTCAACTCCATGGCTGAT	60.226	20	248	10990	11237	gi|326431928|gb|EGD77498.1|	223	2e-55	serine/threonine protein kinase [Salpingoeca sp. ATCC 50818]	sp|Q9FPQ6|GP1_CHLRE	53.5	8e-10	Vegetative cell wall protein gp1 OS=Chlamydomonas reinhardtii GN=GP1 PE=2 SV=1	XF0818	52.4	2e-07	COG2730	Endoglucanase	--
Unigene0091057	1	p2	(AC)9	18	134	151	TGAGGAATACCTGGTCCTGC	60.073	20	CTGTGCAGACCCACAGAGAC	59.442	20	270	30	299	TGAGGAATACCTGGTCCTGC	60.073	20	GCAGACCCACAGAGACACAC	59.283	20	266	30	295	TGAGGAATACCTGGTCCTGC	60.073	20	GTGCAGACCCACAGAGACAC	59.283	20	268	30	297	gi|348533682|ref|XP_003454334.1|	587	1e-166	PREDICTED: ETS-related transcription factor Elf-2-like [Oreochromis niloticus]	sp|Q15723|ELF2_HUMAN	305	1e-81	ETS-related transcription factor Elf-2 OS=Homo sapiens GN=ELF2 PE=1 SV=2	--	--	--	--	--	K09428
Unigene0091097	3	p2	(GT)9	18	1264	1281	TGTTGAGCCACAGTTTGCTT	59.49	20	CGTTCAGCCCAAAGAAGAAG	59.986	20	259	1046	1304	TGTTGAGCCACAGTTTGCTT	59.49	20	GGATACGTTCAGCCCAAAGA	60.074	20	264	1046	1309	GTTTGCTTCTCATGGATGGC	60.613	20	CGTTCAGCCCAAAGAAGAAG	59.986	20	247	1058	1304	gi|348545523|ref|XP_003460229.1|	541	1e-151	PREDICTED: peptidyl-glycine alpha-amidating monooxygenase B-like [Oreochromis niloticus]	sp|P08478|AMDA_XENLA	408	2e-112	Peptidyl-glycine alpha-amidating monooxygenase A OS=Xenopus laevis GN=pam-a PE=1 SV=3	all0422	56.2	5e-07	COG3391	Uncharacterized conserved protein	K00504
Unigene0091116	1	p2	(CA)10	20	4881	4900	GAGCTGTCCCACCTCAAGAC	59.841	20	TGATGGTGGACTGGATGAGA	60.046	20	209	4793	5001	GAGCTGTCCCACCTCAAGAC	59.841	20	GGTGGACTGGATGAGATCGT	59.928	20	205	4793	4997	TGGCTCTCTGAGGATGAACC	60.349	20	GTCTCCAGGTCGATAGCAGC	59.981	20	250	4726	4975	gi|348538896|ref|XP_003456926.1|	2405	0	PREDICTED: multidrug resistance-associated protein 1-like [Oreochromis niloticus]	sp|Q5F364|MRP1_CHICK	1961	0	Multidrug resistance-associated protein 1 OS=Gallus gallus GN=ABCC1 PE=2 SV=1	YDR135c	856	0	COG1132	ABC-type multidrug transport system, ATPase and permease components	K05665
Unigene0091342	1	p2	(GA)11	22	632	653	CTACGCTAAAGCCATGAGGC	60.003	20	GGAACAGAGAGCTGGTGGAG	59.986	20	227	518	744	CTACGCTAAAGCCATGAGGC	60.003	20	AGGAACAGAGAGCTGGTGGA	59.986	20	228	518	745	GAAGTACGTGGCCTCTCTGC	60.02	20	GGAACAGAGAGCTGGTGGAG	59.986	20	143	602	744	gi|348539526|ref|XP_003457240.1|	342	5e-92	PREDICTED: 1,2-dihydroxy-3-keto-5-methylthiopentene dioxygenase-like [Oreochromis niloticus]	sp|F7FKV1|MTND_MONDO	291	1e-77	1,2-dihydroxy-3-keto-5-methylthiopentene dioxygenase OS=Monodelphis domestica GN=ADI1 PE=3 SV=1	YMR009w	128	5e-29	COG1791	Uncharacterized conserved protein, contains double-stranded beta-helix domain	K08967
Unigene0091460	1	p2	(CA)9	18	410	427	ACTCAGCACTTATGGGTCGG	60.134	20	TGAGCTGCGAGGTCTGACTA	59.88	20	176	314	489	ACTCAGCACTTATGGGTCGG	60.134	20	CAAAGCCTTGGCTCTCTGAC	60.134	20	229	314	542	ACTCAGCACTTATGGGTCGG	60.134	20	TGCGAGGTCTGACTAGGCTT	60.156	20	171	314	484	gi|348515269|ref|XP_003445162.1|	1001	0	PREDICTED: cAMP-specific 3',5'-cyclic phosphodiesterase 4B-like [Oreochromis niloticus]	sp|Q07343|PDE4B_HUMAN	805	0	cAMP-specific 3',5'-cyclic phosphodiesterase 4B OS=Homo sapiens GN=PDE4B PE=1 SV=1	--	--	--	--	--	K01120
Unigene0091595	1	p6	(CAGCAT)11	66	855	920	TTGAGTTCACCCTGAGGGAC	60.088	20	TCCTGATCCCACTCTATGGC	60.034	20	208	832	1039	CAAATGAACGCTGCACAACT	59.911	20	TCCTGATCCCACTCTATGGC	60.034	20	258	782	1039	ACAAATGAACGCTGCACAAC	59.77	20	TCCTGATCCCACTCTATGGC	60.034	20	259	781	1039	gi|350539433|ref|NP_001232875.1|	103	7e-20	prostate stem cell antigen precursor-like [Ictalurus punctatus] >gi|90103307|gb|ABD85498.1| prostate stem cell antigen precursor-like [Ictalurus punctatus]	sp|Q8GUC3|BBR_HORVU	66.6	1e-09	Protein Barley B recombinant OS=Hordeum vulgare GN=BBR PE=1 SV=1	--	--	--	--	--	K04704
Unigene0091717	1	p2	(GT)9	18	297	314	GCTACCTCTGTTCCTGCCTG	60.012	20	GGCTTTAGGGTGTGGCATTA	59.96	20	226	224	449	TGCTACCTCTGTTCCTGCCT	60.012	20	GGCTTTAGGGTGTGGCATTA	59.96	20	227	223	449	CTGCTACCTCTGTTCCTGCC	60.012	20	GGCTTTAGGGTGTGGCATTA	59.96	20	228	222	449	gi|348526520|ref|XP_003450767.1|	1612	0	PREDICTED: protein FAM40B-like [Oreochromis niloticus]	sp|Q803T2|FA40A_DANRE	1216	0	Protein FAM40A OS=Danio rerio GN=fam40a PE=1 SV=1	--	--	--	--	--	--
Unigene0091748	1	p3	(AAT)14	42	1701	1742	GTAACTGTTGACGTGCCAGG	59.213	20	TCAGCACCTCGGCTTTATCT	59.978	20	261	1617	1877	TCACTGCTGTGGAAGAGGAA	59.545	20	CCTGGACCAAACCTGATGTC	60.363	20	268	1569	1836	TTCACTGCTGTGGAAGAGGA	59.545	20	CCTGGACCAAACCTGATGTC	60.363	20	269	1568	1836	--	--	--	--	--	--	--	--	--	--	--	--	--	--
Unigene0091748	2	p2	(GT)9	18	1892	1909	AGATAAAGCCGAGGTGCTGA	59.978	20	GCAACACATGCAGAACCAGT	59.758	20	141	1858	1998	AGATAAAGCCGAGGTGCTGA	59.978	20	CATGCAGAACCAGTCACGTT	59.751	20	135	1858	1992	ATAAAGCCGAGGTGCTGATG	60.235	20	GCAACACATGCAGAACCAGT	59.758	20	139	1860	1998	--	--	--	--	--	--	--	--	--	--	--	--	--	--
Unigene0092285	1	p2	(GA)11	22	2407	2428	GTGTTTCCAGCATAGCCGAT	60.103	20	GAAGTGCACTGAGGGGAGAG	59.986	20	256	2229	2484	GTGAGGCGGAGTTAAACGAG	59.875	20	GAAGTGCACTGAGGGGAGAG	59.986	20	106	2379	2484	TGAGGCGGAGTTAAACGAGT	59.875	20	GAAGTGCACTGAGGGGAGAG	59.986	20	105	2380	2484	gi|348539478|ref|XP_003457216.1|	850	0	PREDICTED: actin-related protein 3B-like isoform 1 [Oreochromis niloticus]	sp|Q9P1U1|ARP3B_HUMAN	785	0	Actin-related protein 3B OS=Homo sapiens GN=ACTR3B PE=1 SV=1	SPAC630.03	484	6e-136	COG5277	Actin and related proteins	--
Unigene0092388	1	p2	(AC)9	18	134	151	TGAGGAATACCTGGTCCTGC	60.073	20	CTGTGCAGACCCACAGAGAC	59.442	20	270	30	299	TGAGGAATACCTGGTCCTGC	60.073	20	GCAGACCCACAGAGACACAC	59.283	20	266	30	295	TGAGGAATACCTGGTCCTGC	60.073	20	GTGCAGACCCACAGAGACAC	59.283	20	268	30	297	gi|348533682|ref|XP_003454334.1|	552	1e-155	PREDICTED: ETS-related transcription factor Elf-2-like [Oreochromis niloticus]	sp|Q15723|ELF2_HUMAN	298	1e-79	ETS-related transcription factor Elf-2 OS=Homo sapiens GN=ELF2 PE=1 SV=2	--	--	--	--	--	K09428
Unigene0092600	1	p2	(CA)10	20	2086	2105	TTCTTGCTCGTCCTTCGTTT	59.993	20	CATCAGCTGCTCCTGGTGTA	60.008	20	210	2014	2223	GCTCGTCCTTCGTTTGAAAG	59.993	20	CATCAGCTGCTCCTGGTGTA	60.008	20	205	2019	2223	TTCTTGCTCGTCCTTCGTTT	59.993	20	TCCACAACAAGGTGACGTGT	60.047	20	181	2014	2194	gi|348521270|ref|XP_003448149.1|	1721	0	PREDICTED: diacylglycerol kinase iota [Oreochromis niloticus]	sp|O75912|DGKI_HUMAN	1283	0	Diacylglycerol kinase iota OS=Homo sapiens GN=DGKI PE=1 SV=1	all2748	66.6	2e-10	COG0666	FOG: Ankyrin repeat	K00901
Unigene0092716	2	p2	(TG)9	18	138	155	ATCCAAGCCACTGGAATGAG	60.073	20	ACGTTGATAGGCGGAATGAC	59.962	20	256	64	319	CAGACAAGGGGTGGTCATTT	59.82	20	TACCCGCTGAGTCAGTGTTG	59.897	20	208	17	224	AGCCACTGGAATGAGGTCAG	60.261	20	ACGTTGATAGGCGGAATGAC	59.962	20	251	69	319	gi|348530126|ref|XP_003452562.1|	1488	0	PREDICTED: cadherin-2-like [Oreochromis niloticus]	sp|Q90275|CADH2_DANRE	1309	0	Cadherin-2 OS=Danio rerio GN=cdh2 PE=2 SV=2	--	--	--	--	--	K06736
Unigene0092757	1	p2	(AC)9	18	4170	4187	ACATGCAGCAGATGGTGAAG	59.862	20	GGATGTAACAGGCGGAAGAG	59.694	20	233	4054	4286	ACACGTATACAGGCGCACAC	59.67	20	TGCACTGTCTGATCCCTGTC	59.827	20	203	4141	4343	ACATGCAGCAGATGGTGAAG	59.862	20	TGTAACAGGCGGAAGAGAGG	60.388	20	230	4054	4283	gi|348581726|ref|XP_003476628.1|	1895	0	PREDICTED: 1-phosphatidylinositol-4,5-bisphosphate phosphodiesterase beta-4-like isoform 3 [Cavia porcellus]	sp|Q15147|PLCB4_HUMAN	1870	0	1-phosphatidylinositol-4,5-bisphosphate phosphodiesterase beta-4 OS=Homo sapiens GN=PLCB4 PE=1 SV=3	aq_629	58.2	1e-07	COG1196	Chromosome segregation ATPases	K05858
Unigene0092839	1	p2	(CA)9	18	2585	2602	CAACACCATCACCTCACCTG	59.997	20	CTCTTAGTTTCAGCGTCCCG	60.008	20	234	2534	2767	GTGCAACACCATCACCTCAC	60.013	20	CTCTTAGTTTCAGCGTCCCG	60.008	20	237	2531	2767	GTCCACAGTGCAACACCATC	60.013	20	CTCTTAGTTTCAGCGTCCCG	60.008	20	244	2524	2767	gi|348537478|ref|XP_003456221.1|	1076	0	PREDICTED: E3 ubiquitin-protein ligase RNF220 [Oreochromis niloticus]	sp|Q08DV5|RN220_BOVIN	780	0	E3 ubiquitin-protein ligase RNF220 OS=Bos taurus GN=RNF220 PE=2 SV=1	--	--	--	--	--	--
Unigene0093553	1	p2	(CT)11	22	2210	2231	GAGTCAACTGCCCCAATGAT	59.934	20	TTTCCCATTGCTGCTTTTCT	59.823	20	276	2026	2301	GAGTCAACTGCCCCAATGAT	59.934	20	TCTACATGGTGGTCTTCCCC	59.779	20	236	2026	2261	GAGTCAACTGCCCCAATGAT	59.934	20	CCCATTGCTGCTTTTCTGTT	60.249	20	273	2026	2298	gi|348534202|ref|XP_003454592.1|	2220	0	PREDICTED: plasma membrane calcium-transporting ATPase 2-like isoform 1 [Oreochromis niloticus]	sp|P58165|AT2B2_OREMO	2047	0	Plasma membrane calcium-transporting ATPase 2 (Fragment) OS=Oreochromis mossambicus GN=atp2b2 PE=2 SV=1	BH2515	304	2e-81	COG0474	Cation transport ATPase	K05850
Unigene0093554	1	p2	(AG)11	22	3749	3770	TTTCCCATTGCTGCTTTTCT	59.823	20	GAGTCAACTGCCCCAATGAT	59.934	20	276	3677	3952	TCTACATGGTGGTCTTCCCC	59.779	20	GAGTCAACTGCCCCAATGAT	59.934	20	236	3717	3952	CCCATTGCTGCTTTTCTGTT	60.249	20	GAGTCAACTGCCCCAATGAT	59.934	20	273	3680	3952	gi|348534202|ref|XP_003454592.1|	1761	0	PREDICTED: plasma membrane calcium-transporting ATPase 2-like isoform 1 [Oreochromis niloticus]	sp|P58165|AT2B2_OREMO	1675	0	Plasma membrane calcium-transporting ATPase 2 (Fragment) OS=Oreochromis mossambicus GN=atp2b2 PE=2 SV=1	BH2515	268	8e-71	COG0474	Cation transport ATPase	K05850
Unigene0093713	1	p2	(CA)9	18	1550	1567	ACTGTGACAACCCCTCGAAC	60.009	20	GGCCAGTGCCGTAGTTATGT	60.022	20	200	1434	1633	GACAGCCTGGACTTGGTCAT	60.12	20	GGCCAGTGCCGTAGTTATGT	60.022	20	264	1370	1633	ACTGTGACAACCCCTCGAAC	60.009	20	CTGGCCAGTGCCGTAGTTAT	60.154	20	202	1434	1635	gi|348502717|ref|XP_003438914.1|	598	1e-169	PREDICTED: glutamate receptor-interacting protein 2-like [Oreochromis niloticus]	sp|A8E0R9|GRIP2_XENLA	276	4e-73	Glutamate receptor-interacting protein 2 OS=Xenopus laevis GN=grip2 PE=2 SV=2	--	--	--	--	--	--
Unigene0093982	2	p2	(GT)9	18	946	963	TCTGAGGTTAGACGCTCGGT	60.012	20	CTGGTTGGCGAGAAAAAGAG	59.986	20	128	923	1050	TCTGAGGTTAGACGCTCGGT	60.012	20	ACTGGTTGGCGAGAAAAAGA	59.853	20	129	923	1051	TCTGAGGTTAGACGCTCGGT	60.012	20	TGGTTGGCGAGAAAAAGAGT	59.853	20	127	923	1049	gi|348534341|ref|XP_003454660.1|	211	2e-52	PREDICTED: microtubule-actin cross-linking factor 1-like [Oreochromis niloticus]	sp|Q9QXZ0|MACF1_MOUSE	116	9e-25	Microtubule-actin cross-linking factor 1 OS=Mus musculus GN=Macf1 PE=1 SV=2	--	--	--	--	--	--
Unigene0094592	1	p2	(AC)9	18	211	228	TCTCTCAGTCCCCAGCTCAC	60.55	20	TGGAATAAACAGCAGGGGAG	60.066	20	211	85	295	CACCTCCCTCTCTCAGTCCC	61.2	20	TGGAATAAACAGCAGGGGAG	60.066	20	219	77	295	GGACCTCGGGTCTCTTCTG	59.776	19	CTGGAATAAACAGCAGGGGA	60.066	20	173	124	296	gi|348520479|ref|XP_003447755.1|	2100	0	PREDICTED: plasma membrane calcium-transporting ATPase 3-like [Oreochromis niloticus]	sp|P11505|AT2B1_RAT	1851	0	Plasma membrane calcium-transporting ATPase 1 OS=Rattus norvegicus GN=Atp2b1 PE=2 SV=2	MA4082	356	2e-97	COG0474	Cation transport ATPase	K05850
Unigene0094684	1	c	(CA)6gacg(CA)9	34	974	1007	ATAGGAGCTGCCCTGTCCTT	60.233	20	GTCGAGGCCTGACTGACTGT	60.467	20	270	918	1187	GGGTCTGTCCATAGGAGCTG	59.679	20	GTCGAGGCCTGACTGACTGT	60.467	20	280	908	1187	CCTCTGAGGGCTCTGGTGTA	60.399	20	GTCGAGGCCTGACTGACTGT	60.467	20	249	939	1187	gi|348511053|ref|XP_003443059.1|	534	1e-149	PREDICTED: endophilin-B1-like [Oreochromis niloticus]	sp|Q32LM0|SHLB1_BOVIN	273	5e-72	Endophilin-B1 OS=Bos taurus GN=SH3GLB1 PE=2 SV=1	--	--	--	--	--	K11248
Unigene0094686	1	p2	(CA)9	18	698	715	TACGGGGACGTAGACACACA	60.025	20	TCGCGTGGCAGTAGATGTAA	60.423	20	278	661	938	TACGGGGACGTAGACACACA	60.025	20	GTCGAGGCCTGACTGACTGT	60.467	20	235	661	895	TACGGGGACGTAGACACACA	60.025	20	GCTAATCAAGCTCTGTGCCA	59.178	20	114	661	774	gi|348511053|ref|XP_003443059.1|	535	1e-150	PREDICTED: endophilin-B1-like [Oreochromis niloticus]	sp|Q32LM0|SHLB1_BOVIN	275	2e-72	Endophilin-B1 OS=Bos taurus GN=SH3GLB1 PE=2 SV=1	--	--	--	--	--	K11248
Unigene0094803	3	p2	(CA)10	20	843	862	CTTCTTCTCCCTGTTGCCTG	59.982	20	TGGCTTTCAGAAGCAGATCA	59.673	20	159	781	939	CTTCTTCTCCCTGTTGCCTG	59.982	20	ACGTACATCGAGGCTGGAGA	60.823	20	128	781	908	CTTCTTCTCCCTGTTGCCTG	59.982	20	GTACATCGAGGCTGGAGACG	60.823	20	126	781	906	--	--	--	--	--	--	--	--	--	--	--	--	--	--
Unigene0095315	2	p2	(TG)9	18	2977	2994	TTGCTTTTGCTGTGCCTATG	60.014	20	CGACCTCGGTACCAAATCAT	59.813	20	221	2797	3017	CTTGTCCTGTGCATTGCTGT	59.905	20	CGACCTCGGTACCAAATCAT	59.813	20	126	2892	3017	TTGCTTTTGCTGTGCCTATG	60.014	20	ACGACCTCGGTACCAAATCA	60.375	20	222	2797	3018	--	--	--	--	--	--	--	--	--	--	--	--	--	--
Unigene0095333	1	p2	(GT)9	18	577	594	CCCCACACAGACACACAAAA	60.454	20	GAATCATGAGCCTCGACACA	59.794	20	250	382	631	CCCCCAGTTCAGAACAACAG	60.536	20	GAATCATGAGCCTCGACACA	59.794	20	189	443	631	CCCCAGTTCAGAACAACAGG	60.536	20	GAATCATGAGCCTCGACACA	59.794	20	188	444	631	gi|74095907|ref|NP_001027780.1|	572	1e-161	coagulation factor VIIb precursor [Takifugu rubripes] >gi|28194020|gb|AAO33369.1|AF465274_1 coagulation factor VIIb precursor [Takifugu rubripes]	sp|Q2F9P2|FA7_PANTR	307	3e-82	Coagulation factor VII OS=Pan troglodytes GN=F7 PE=3 SV=1	mlr3307	110	9e-24	COG5640	Secreted trypsin-like serine protease	K01320
Unigene0095395	2	p2	(TG)10	20	2665	2684	TTTTGGCACTGCTGAGTTTG	60.027	20	TAATGCTCTTCGGATGTCCC	60.036	20	228	2586	2813	AGCCCCATGTAATGTTCAGC	59.962	20	TAATGCTCTTCGGATGTCCC	60.036	20	270	2544	2813	GGAATCCCAAGTGTGTTGCT	59.973	20	TTATTGTCAGAAGGGCAGGG	60.066	20	228	2621	2848	--	--	--	--	--	--	--	--	--	--	--	--	--	--
Unigene0095538	1	p2	(CA)9	18	920	937	TGTTTCCCACCACACGAGTA	60.001	20	GTGGCTGTGATGTCGAGTGT	59.744	20	263	778	1040	TGTTTCCCACCACACGAGTA	60.001	20	TGGCTGTGATGTCGAGTGTT	60.319	20	262	778	1039	TGTTTCCCACCACACGAGTA	60.001	20	TTGTGGCTGTGATGTCGAGT	60.319	20	265	778	1042	gi|348532245|ref|XP_003453617.1|	171	2e-40	PREDICTED: Fanconi anemia group J protein [Oreochromis niloticus]	sp|Q9CR92|CCD96_MOUSE	56.2	1e-06	Coiled-coil domain-containing protein 96 OS=Mus musculus GN=Ccdc96 PE=2 SV=1	--	--	--	--	--	--
Unigene0095539	1	p2	(GT)9	18	98	115	ATTTGCCCTTCTCCACTGTC	59.141	20	TGTTTCCCACCACACGAGTA	60.001	20	205	52	256	ATTTGCCCTTCTCCACTGTC	59.141	20	TAACCACCTGGACGACATGA	59.96	20	267	52	318	CCCTTCTCCACTGTCAGCAG	60.997	20	TGTTTCCCACCACACGAGTA	60.001	20	200	57	256	gi|348532245|ref|XP_003453617.1|	167	8e-40	PREDICTED: Fanconi anemia group J protein [Oreochromis niloticus]	sp|P14328|SP96_DICDI	61.2	1e-08	Spore coat protein SP96 OS=Dictyostelium discoideum GN=cotA PE=4 SV=2	--	--	--	--	--	--
Unigene0095655	2	p2	(GT)10	20	3736	3755	AGATAAAGCCGAGGTGCTGA	59.978	20	GCAACACATGCAGAACCAGT	59.758	20	143	3702	3844	AGATAAAGCCGAGGTGCTGA	59.978	20	CATGCAGAACCAGTCACGTT	59.751	20	137	3702	3838	ATAAAGCCGAGGTGCTGATG	60.235	20	GCAACACATGCAGAACCAGT	59.758	20	141	3704	3844	gi|348506868|ref|XP_003440979.1|	469	1e-130	PREDICTED: NEDD4 family-interacting protein 2-like [Oreochromis niloticus]	sp|Q9NV92|NFIP2_HUMAN	339	1e-91	NEDD4 family-interacting protein 2 OS=Homo sapiens GN=NDFIP2 PE=1 SV=2	--	--	--	--	--	--
Unigene0095656	1	p3	(AAT)14	42	3479	3520	GTAACTGTTGACGTGCCAGG	59.213	20	TCAGCACCTCGGCTTTATCT	59.978	20	261	3395	3655	TCACTGCTGTGGAAGAGGAA	59.545	20	CCTGGACCAAACCTGATGTC	60.363	20	268	3347	3614	TTCACTGCTGTGGAAGAGGA	59.545	20	CCTGGACCAAACCTGATGTC	60.363	20	269	3346	3614	gi|348506868|ref|XP_003440979.1|	469	1e-130	PREDICTED: NEDD4 family-interacting protein 2-like [Oreochromis niloticus]	sp|Q9NV92|NFIP2_HUMAN	339	1e-91	NEDD4 family-interacting protein 2 OS=Homo sapiens GN=NDFIP2 PE=1 SV=2	--	--	--	--	--	--
Unigene0095656	2	p2	(GT)9	18	3670	3687	AGATAAAGCCGAGGTGCTGA	59.978	20	GCAACACATGCAGAACCAGT	59.758	20	141	3636	3776	AGATAAAGCCGAGGTGCTGA	59.978	20	CATGCAGAACCAGTCACGTT	59.751	20	135	3636	3770	ATAAAGCCGAGGTGCTGATG	60.235	20	GCAACACATGCAGAACCAGT	59.758	20	139	3638	3776	gi|348506868|ref|XP_003440979.1|	469	1e-130	PREDICTED: NEDD4 family-interacting protein 2-like [Oreochromis niloticus]	sp|Q9NV92|NFIP2_HUMAN	339	1e-91	NEDD4 family-interacting protein 2 OS=Homo sapiens GN=NDFIP2 PE=1 SV=2	--	--	--	--	--	--
Unigene0095660	3	p2	(CA)9	18	3092	3109	GTGTGTCTGCAACAGCCAGT	59.948	20	TGGCAACAGCAGCAATTAAG	60.014	20	270	2911	3180	TGGTAGCGAAGTGTGTCTGC	60.056	20	TGGCAACAGCAGCAATTAAG	60.014	20	280	2901	3180	AGTGTGTCTGCAACAGCCAG	60.096	20	TGGCAACAGCAGCAATTAAG	60.014	20	271	2910	3180	gi|348527024|ref|XP_003451019.1|	1117	0	PREDICTED: SHC-transforming protein 1-like [Oreochromis niloticus]	sp|P29353|SHC1_HUMAN	735	0	SHC-transforming protein 1 OS=Homo sapiens GN=SHC1 PE=1 SV=4	--	--	--	--	--	K06279
Unigene0095662	2	p2	(TG)9	18	2327	2344	TGGCAACAGCAGCAATTAAG	60.014	20	GTGTGTCTGCAACAGCCAGT	59.948	20	270	2254	2523	TGGCAACAGCAGCAATTAAG	60.014	20	TGGTAGCGAAGTGTGTCTGC	60.056	20	280	2254	2533	TGGCAACAGCAGCAATTAAG	60.014	20	AGTGTGTCTGCAACAGCCAG	60.096	20	271	2254	2524	gi|348527024|ref|XP_003451019.1|	86.3	8e-15	PREDICTED: SHC-transforming protein 1-like [Oreochromis niloticus]	sp|Q8AY68|SHC1_XENLA	83.2	1e-14	SHC-transforming protein 1 OS=Xenopus laevis GN=shc1 PE=1 SV=2	--	--	--	--	--	K06279
Unigene0095922	2	p2	(TG)10	20	792	811	TGACAGCTGCTTGTTTTTGG	60.027	20	CGATCCGAACTTGGACATCT	60.073	20	186	697	882	TGACAGCTGCTTGTTTTTGG	60.027	20	CTCGATCCGAACTTGGACAT	60.073	20	188	697	884	AGCTGCTTGTTTTTGGCATT	59.889	20	CGATCCGAACTTGGACATCT	60.073	20	182	701	882	gi|348512691|ref|XP_003443876.1|	914	0	PREDICTED: uncharacterized aarF domain-containing protein kinase 2-like [Oreochromis niloticus]	sp|Q7Z695|ADCK2_HUMAN	545	6e-154	Uncharacterized aarF domain-containing protein kinase 2 OS=Homo sapiens GN=ADCK2 PE=2 SV=1	SPBC21C3.03	248	6e-65	COG0661	Predicted unusual protein kinase	K08869
Unigene0096102	1	p2	(AC)9	18	2358	2375	CGAGGCCGTGTTAGTTCAAT	60.132	20	AGGCCATGAAAGAAAACCCT	59.94	20	246	2258	2503	CGAGGCCGTGTTAGTTCAAT	60.132	20	GGGTGAAGGAGAGGGAAAAC	59.912	20	217	2258	2474	CGAGGCCGTGTTAGTTCAAT	60.132	20	TAGCTGTGTGCACGTGTGTG	60.596	20	142	2258	2399	gi|348544581|ref|XP_003459759.1|	1091	0	PREDICTED: splicing factor 1-like isoform 1 [Oreochromis niloticus]	sp|Q15637|SF01_HUMAN	879	0	Splicing factor 1 OS=Homo sapiens GN=SF1 PE=1 SV=4	SPCC962.06c_1	192	2e-48	COG5176	Splicing factor (branch point binding protein)	K13095
Unigene0096447	1	p2	(GT)9	18	40	57	CTGCAGCAAGAAGTGAGTGTG	59.828	21	TTCAAACACAGTGGGCACAT	60.008	20	240	8	247	GCGAATACTGCAGCAAGAAG	58.824	20	TTCAAACACAGTGGGCACAT	60.008	20	247	1	247	AGCGAATACTGCAGCAAGAA	58.824	20	TTCAAACACAGTGGGCACAT	60.008	20	248	0	247	gi|348533598|ref|XP_003454292.1|	388	1e-106	PREDICTED: transforming protein RhoA-like [Oreochromis niloticus]	sp|P61589|RHOA_RAT	378	9e-104	Transforming protein RhoA OS=Rattus norvegicus GN=Rhoa PE=1 SV=1	SPAC16A10.04	219	9e-57	COG1100	GTPase SAR1 and related small G proteins	K04513
Unigene0097053	1	p2	(GT)10	20	156	175	ACAGTCTGAGTCCCCGTCAG	60.306	20	CCGTCACCTTTTGTCTGGAT	59.966	20	167	120	286	ACCCGTCAGGCATCTCATAC	59.957	20	GATGGACCGACGGTTATGAT	59.635	20	229	2	230	ACCCGTCAGGCATCTCATAC	59.957	20	GAGACGTTTCCTGATGGACC	59.511	20	241	2	242	gi|292624080|ref|XP_002665524.1|	429	1e-118	PREDICTED: carcinoembryonic antigen-related cell adhesion molecule 5 [Danio rerio]	sp|P06731|CEAM5_HUMAN	158	2e-37	Carcinoembryonic antigen-related cell adhesion molecule 5 OS=Homo sapiens GN=CEACAM5 PE=1 SV=3	--	--	--	--	--	--
Unigene0097182	1	p2	(AC)9	18	3418	3435	GCAGCGCAGAATCCTAGTTC	60.125	20	AGCTCTGTGTCTTCGTGGGT	59.907	20	259	3343	3601	GCAGCGCAGAATCCTAGTTC	60.125	20	CAGAACACATGGCATCTTGG	60.112	20	234	3343	3576	GCGCAGAATCCTAGTTCACC	59.843	20	AGCTCTGTGTCTTCGTGGGT	59.907	20	256	3346	3601	--	--	--	--	--	--	--	--	--	--	--	--	--	--
Unigene0098752	2	p2	(GT)10	20	976	995	CTCTTAGTTTCAGCGTCCCG	60.008	20	GGAGGTATGGAAGCCTGACA	60.073	20	274	810	1083	AGAGGGAGGAAACAAACGGT	59.972	20	GGAGGTATGGAAGCCTGACA	60.073	20	204	880	1083	CTCTTAGTTTCAGCGTCCCG	60.008	20	TTGGTGGACACTGGACAGAA	60.129	20	243	810	1052	--	--	--	--	--	--	--	--	--	--	--	--	--	--
Unigene0098797	3	p2	(TG)9	18	1269	1286	TCTGAGTGTTTTTCCCCCAC	59.943	20	TATGCATAGGGTCATGCCAA	59.914	20	112	1240	1351	TGAGTGTTTTTCCCCCACTC	59.943	20	TATGCATAGGGTCATGCCAA	59.914	20	110	1242	1351	GTGTTTTTCCCCCACTCTGA	59.943	20	TATGCATAGGGTCATGCCAA	59.914	20	107	1245	1351	--	--	--	--	--	--	--	--	--	--	--	--	--	--
Unigene0099053	1	p2	(TG)9	18	489	506	CCAAATCAACCAAATTCAACC	59.168	21	TCGCTTTCTCCTTCTCTCTGA	59.439	21	237	300	536	ACCAAATCAACCAAATTCAACC	59.966	22	TCGCTTTCTCCTTCTCTCTGA	59.439	21	238	299	536	TCAACCAAATCAACCAAATTCA	60.202	22	TCGCTTTCTCCTTCTCTCTGA	59.439	21	241	296	536	gi|348524372|ref|XP_003449697.1|	907	0	PREDICTED: complement component C9-like [Oreochromis niloticus]	sp|P79755|CO9_TAKRU	907	0	Complement component C9 OS=Takifugu rubripes GN=c9 PE=3 SV=1	--	--	--	--	--	K04000
Unigene0099273	1	p2	(AC)9	18	4196	4213	ACATGCAGCAGATGGTGAAG	59.862	20	GGATGTAACAGGCGGAAGAG	59.694	20	233	4080	4312	ACACGTATACAGGCGCACAC	59.67	20	TGCACTGTCTGATCCCTGTC	59.827	20	203	4167	4369	ACATGCAGCAGATGGTGAAG	59.862	20	TGTAACAGGCGGAAGAGAGG	60.388	20	230	4080	4309	gi|348581726|ref|XP_003476628.1|	1895	0	PREDICTED: 1-phosphatidylinositol-4,5-bisphosphate phosphodiesterase beta-4-like isoform 3 [Cavia porcellus]	sp|Q15147|PLCB4_HUMAN	1870	0	1-phosphatidylinositol-4,5-bisphosphate phosphodiesterase beta-4 OS=Homo sapiens GN=PLCB4 PE=1 SV=3	aq_629	58.2	1e-07	COG1196	Chromosome segregation ATPases	K05858
Unigene0100590	1	p2	(CA)9	18	24	41	GACGGTGAGCACAGAAACCT	60.307	20	TAATTCTGTTCCAAGGGGGA	59.359	20	109	1	109	AGACGGTGAGCACAGAAACC	60.307	20	TAATTCTGTTCCAAGGGGGA	59.359	20	110	0	109	AGACGGTGAGCACAGAAACC	60.307	20	ATTCTGTTCCAAGGGGGAAA	60.663	20	108	0	107	--	--	--	--	--	--	--	--	--	--	--	--	--	--
Unigene0100617	2	p2	(GT)9	18	870	887	GCAGCTTTCTGGGTGAAAAG	59.993	20	AGGGAGACCAGGAGAACGTC	60.648	20	141	777	917	GCTGTTTAGGTTTTGGCTGC	59.889	20	AGGGAGACCAGGAGAACGTC	60.648	20	165	753	917	TTTAGGTTTTGGCTGCACCT	59.747	20	AGGGAGACCAGGAGAACGTC	60.648	20	161	757	917	--	--	--	--	--	--	--	--	--	--	--	--	--	--
Unigene0100974	1	p2	(AC)9	18	641	658	GCATGAAGCATGTGACCAGA	60.852	20	TCACAAGCTGGTGGAACATT	59.139	20	254	551	804	GCATGAAGCATGTGACCAGA	60.852	20	TTCACAAGCTGGTGGAACAT	59.139	20	255	551	805	GCATGAAGCATGTGACCAGA	60.852	20	GCTGGTGGAACATTTTCAAGA	60.103	21	248	551	798	--	--	--	--	--	--	--	--	--	--	--	--	--	--
Unigene0102029	1	p2	(CA)9	18	51	68	GACACAGAACCTCCTCCTTCC	60.103	21	TCTCAGCTGTCTCAGCCAAA	59.855	20	176	21	196	CACAGAACCTCCTCCTTCCTC	60.237	21	TCTCAGCTGTCTCAGCCAAA	59.855	20	174	23	196	CACAGAACCTCCTCCTTCCTC	60.237	21	CGCAGGAAGTGGAAATGAGT	60.255	20	233	23	255	gi|348538589|ref|XP_003456773.1|	960	0	PREDICTED: XK-related protein 4 [Oreochromis niloticus]	sp|Q5GH76|XKR4_HUMAN	748	0	XK-related protein 4 OS=Homo sapiens GN=XKR4 PE=1 SV=1	--	--	--	--	--	--
Unigene0102325	1	p2	(TG)9	18	145	162	ACTGGACAGAAGGACAACCC	59	20	GTCTCGGTCCAGAGGTTGAG	59.835	20	196	108	303	ACTGGACAGAAGGACAACCC	59	20	CTCGGTCCAGAGGTTGAGAC	59.835	20	194	108	301	ACAGAAGGACAACCCCCTG	59.946	19	GTCTCGGTCCAGAGGTTGAG	59.835	20	191	113	303	gi|118095012|ref|XP_422618.2|	702	0	PREDICTED: similar to KIAA1486 protein [Gallus gallus]	sp|Q9Y6X6|MYO16_HUMAN	306	5e-82	Myosin-XVI OS=Homo sapiens GN=MYO16 PE=1 SV=3	--	--	--	--	--	--
Unigene0102780	1	p2	(CA)9	18	92	109	GGCTGTGTGCATTTCTCTGA	59.992	20	CCACCTGTGGTAACTCCACC	60.275	20	197	31	227	GGCTGTGTGCATTTCTCTGA	59.992	20	CACCTGTGGTAACTCCACCA	59.435	20	196	31	226	GGCTGTGTGCATTTCTCTGA	59.992	20	CCTCCACCTGTGGTAACTCC	59.425	20	200	31	230	--	--	--	--	--	--	--	--	--	--	--	--	--	--
Unigene0102784	2	p2	(TG)9	18	624	641	ATCCAGGTGAACACAAACCC	59.679	20	ATATGGGCTCCTTGACCACA	60.34	20	190	485	674	TCCAGGTGAACACAAACCCT	60.399	20	ATATGGGCTCCTTGACCACA	60.34	20	189	486	674	ATCCAGGTGAACACAAACCC	59.679	20	AAATATGGGCTCCTTGACCA	59.387	20	192	485	676	--	--	--	--	--	--	--	--	--	--	--	--	--	--
Unigene0102811	1	p2	(CA)9	18	147	164	TGTGTATGAGCAGGAGGCAG	60.008	20	CTGGTGCTCTGTGAAATGGA	59.831	20	210	10	219	TGTGTATGAGCAGGAGGCAG	60.008	20	CTTTGCTGGTGCTCTGTGAA	60.175	20	215	10	224	AAGCGCCTTCATTCATCATC	60.185	20	TATCTACGCTGGCCTTTGCT	60.003	20	120	118	237	--	--	--	--	--	--	--	--	--	--	--	--	--	--
Unigene0102942	1	p2	(TG)9	18	27	44	GTGCGTGAGTGTGTGTGTGA	60.437	20	TTTCGTCAACTTCCCAGGAG	60.224	20	260	3	262	TGCGTGAGTGTGTGTGTGAG	60.593	20	TTTCGTCAACTTCCCAGGAG	60.224	20	259	4	262	GTGCGTGAGTGTGTGTGTGA	60.437	20	CGTCAACTTCCCAGGAGCTA	60.388	20	257	3	259	--	--	--	--	--	--	--	--	--	--	--	--	--	--
Unigene0103027	1	p2	(GT)9	18	112	129	TGGCTGCTGGATGTAAACAG	59.864	20	TGCAGTCCTCACAGATACCG	59.855	20	218	13	230	CTGTGGCTGCTGGATGTAAA	59.864	20	TGCAGTCCTCACAGATACCG	59.855	20	221	10	230	CATGTTGATCTGTGGCTGCT	59.862	20	TGCAGTCCTCACAGATACCG	59.855	20	230	1	230	gi|291415448|ref|XP_002723964.1|	97.4	1e-18	PREDICTED: BCL2-like 12-like [Oryctolagus cuniculus]	sp|Q9HB09|B2L12_HUMAN	94.4	1e-18	Bcl-2-like protein 12 OS=Homo sapiens GN=BCL2L12 PE=1 SV=1	--	--	--	--	--	--
Unigene0103333	1	p2	(GA)11	22	1440	1461	ACAATCGCCTGAAGATGACC	60.081	20	TGTCCTTCCCTCACTTTGCT	59.844	20	158	1332	1489	ACAATCGCCTGAAGATGACC	60.081	20	GTCCTTCCCTCACTTTGCTG	59.844	20	157	1332	1488	ACAATCGCCTGAAGATGACC	60.081	20	CTGTCCTTCCCTCACTTTGC	59.844	20	159	1332	1490	gi|209153223|gb|ACI33149.1|	421	1e-116	Ras association domain-containing protein 1 [Salmo salar]	sp|Q9NS23|RASF1_HUMAN	302	5e-81	Ras association domain-containing protein 1 OS=Homo sapiens GN=RASSF1 PE=1 SV=1	--	--	--	--	--	K09850
Unigene0104503	1	p2	(GT)9	18	738	755	TTCTGTGTTTCTGTCCCACG	59.72	20	TGCTGTGAGGGTTAAAGCAA	59.464	20	198	612	809	TCTGTGTTTCTGTCCCACGA	60.285	20	TGCTGTGAGGGTTAAAGCAA	59.464	20	197	613	809	GTTTCTGTCCCACGATACGG	60.375	20	TGCTGTGAGGGTTAAAGCAA	59.464	20	192	618	809	--	--	--	--	--	--	--	--	--	--	--	--	--	--
Unigene0104556	1	p2	(CA)9	18	42	59	GGATGGACCCTCTCTGTGTC	59.488	20	ACACGAGCACATCATGCAAT	60.152	20	188	0	187	GGATGGACCCTCTCTGTGTC	59.488	20	ACAAAACTCAATGTGCACGC	59.77	20	109	0	108	GGATGGACCCTCTCTGTGTC	59.488	20	CACCAGAAACACGAGCACAT	59.751	20	196	0	195	--	--	--	--	--	--	--	--	--	--	--	--	--	--
Unigene0105239	1	p2	(TG)10	20	694	713	CCTCCTGTCAGTCAAGGCTC	59.986	20	TAAGGCAGTGAAGCCATCAG	59.024	20	126	619	744	ATTCCCTGGAGCCTCAGATT	60.037	20	TAAGGCAGTGAAGCCATCAG	59.024	20	208	537	744	GCTCAGCTGTCTCTGTGCTG	60.08	20	TAAGGCAGTGAAGCCATCAG	59.024	20	181	564	744	--	--	--	--	--	--	--	--	--	--	--	--	--	--
Unigene0105773	1	p2	(AC)9	18	109	126	ATAGCTTGTCTGGGGTCACG	60.134	20	TTGTGGTGTTGCCTCTTCAG	59.873	20	155	59	213	ATAGCTTGTCTGGGGTCACG	60.134	20	CAAAGTGGAACAGCAGAGCA	60.175	20	229	59	287	ATAGCTTGTCTGGGGTCACG	60.134	20	TTTGTGGTGTTGCCTCTTCA	60.278	20	156	59	214	gi|348524258|ref|XP_003449640.1|	79.7	4e-14	PREDICTED: diacylglycerol kinase eta [Oreochromis niloticus]	sp|Q64398|DGKH_MESAU	77	4e-14	Diacylglycerol kinase eta OS=Mesocricetus auratus GN=DGKH PE=2 SV=1	--	--	--	--	--	K00901
Unigene0105810	1	p2	(GT)10	20	162	181	CTCCTTCCCTCCTGAAGCTC	60.468	20	AACTGGCAGGACAAGCTGTT	59.914	20	149	57	205	CTCCTTCCCTCCTGAAGCTC	60.468	20	AGAAGCCTGCTGGAAACAGA	60.134	20	249	57	305	CTCCTTCCCTCCTGAAGCTC	60.468	20	GAAGCCTGCTGGAAACAGAG	60.134	20	248	57	304	gi|185133615|ref|NP_001117826.1|	596	1e-168	type I keratin S8 [Oncorhynchus mykiss] >gi|15028982|emb|CAC45059.1| type I keratin S8 [Oncorhynchus mykiss]	sp|Q8JFQ6|K1C13_ONCMY	419	4e-116	Keratin, type I cytoskeletal 13 OS=Oncorhynchus mykiss GN=krt13 PE=2 SV=1	SPAC10F6.09c	52	3e-06	COG1196	Chromosome segregation ATPases	K07604
Unigene0105847	1	p2	(TG)11	22	27	48	TGTGTGCATCATGTGTGTGTT	59.475	21	AGGAGGAGGAAGGAGAGCAC	59.952	20	217	0	216	TGTGTGCATCATGTGTGTGTT	59.475	21	TCAGCGTACACACAGCTTCC	60.056	20	125	0	124	TGTGTGCATCATGTGTGTGTT	59.475	21	GAGGAGGAGGAGGAAGGAGA	59.883	20	221	0	220	gi|348521950|ref|XP_003448489.1|	565	1e-159	PREDICTED: heterogeneous nuclear ribonucleoproteins C1/C2-like [Oreochromis niloticus]	sp|Q9Z204|HNRPC_MOUSE	343	1e-93	Heterogeneous nuclear ribonucleoproteins C1/C2 OS=Mus musculus GN=Hnrnpc PE=1 SV=1	SPAC140.02	57.4	6e-08	COG0724	RNA-binding proteins (RRM domain)	K12884
Unigene0106655	2	p2	(TG)9	18	245	262	CAGTTAATGGCTGGTGGGTT	59.853	20	CCTATCCCTTCCTCTCCCTG	60.023	20	269	46	314	ATATGGGGTGGAATGGTGTG	60.317	20	CCTATCCCTTCCTCTCCCTG	60.023	20	187	128	314	GCTGGTGGGTTTATAGGGCT	60.34	20	CCTATCCCTTCCTCTCCCTG	60.023	20	260	55	314	gi|348526151|ref|XP_003450584.1|	741	0	PREDICTED: cell adhesion molecule 4-like [Oreochromis niloticus]	sp|Q66KX2|CADM4_XENLA	493	2e-138	Cell adhesion molecule 4 OS=Xenopus laevis GN=cadm4 PE=2 SV=1	--	--	--	--	--	K06783
Unigene0107398	1	p2	(GT)9	18	500	517	GCGGCTGTGACTTTTACACA	59.911	20	AACATGAACATGCCGACAGA	60.12	20	176	366	541	TACAGGGTGGACACAGACGA	60.154	20	AACATGAACATGCCGACAGA	60.12	20	205	337	541	TGGACACAGACGAAGAGCTG	60.178	20	AACATGAACATGCCGACAGA	60.12	20	198	344	541	--	--	--	--	--	--	--	--	--	--	--	--	--	--
Unigene0107924	2	p2	(TG)9	18	461	478	AGCTGCTGGAAGGTGAACAT	59.874	20	CGGTCTCAGCTACTCAAGGG	60.005	20	208	360	567	AGCTGCTGGAAGGTGAACAT	59.874	20	AGAGCAACACCGCTCACTTT	60.058	20	166	360	525	TTGCCAGTCATGCGATTAAA	60.215	20	CGGTCTCAGCTACTCAAGGG	60.005	20	157	411	567	--	--	--	--	--	--	--	--	--	--	--	--	--	--
Unigene0108089	1	p2	(TG)9	18	1613	1630	GAGGAAGAGGAGGAGGAGGA	59.883	20	ATCGCCACCTTTCAGACAAC	60.119	20	274	1432	1705	GAGGAAGAGGAGGAGGAGGA	59.883	20	AGAGACGGCATCGTCAAAGT	59.874	20	229	1432	1660	GAGGAAGAGGAGGAGGAGGA	59.883	20	AGACGGCATCGTCAAAGTCT	59.874	20	227	1432	1658	gi|348527536|ref|XP_003451275.1|	901	0	PREDICTED: phosphoinositide 3-kinase regulatory subunit 4 [Oreochromis niloticus]	sp|Q99570|PI3R4_HUMAN	778	0	Phosphoinositide 3-kinase regulatory subunit 4 OS=Homo sapiens GN=PIK3R4 PE=1 SV=3	MA2525	51.6	8e-06	COG2319	FOG: WD40 repeat	K08333
Unigene0108123	2	p2	(AC)9	18	307	324	CGTGTTTGTCATCTTTTGTGG	59.083	21	GACAGAGGGCGAGCAACTAC	60.02	20	149	246	394	CGTGTTTGTCATCTTTTGTGG	59.083	21	TGTATTTCCCAAAGCCGTTC	59.938	20	192	246	437	CGTGTTTGTCATCTTTTGTGGT	59.936	22	GACAGAGGGCGAGCAACTAC	60.02	20	149	246	394	--	--	--	--	--	--	--	--	--	--	--	--	--	--
Unigene0108204	1	p2	(AC)10	20	9250	9269	GACCTAACCCAAGCCATCAA	59.933	20	CAGGAAAAAGCAAAGGAGGA	59.424	20	246	9199	9444	AGGAGGGGAAAGAAAATGGA	59.875	20	CAGGAAAAAGCAAAGGAGGA	59.424	20	277	9168	9444	GAGGAGGGGAAAGAAAATGG	59.875	20	CAGGAAAAAGCAAAGGAGGA	59.424	20	278	9167	9444	gi|348529164|ref|XP_003452084.1|	4382	0	PREDICTED: golgin subfamily B member 1-like [Oreochromis niloticus]	sp|Q14789|GOGB1_HUMAN	1219	0	Golgin subfamily B member 1 OS=Homo sapiens GN=GOLGB1 PE=1 SV=2	aq_1006	159	1e-37	COG0419	ATPase involved in DNA repair	--
Unigene0108251	1	p2	(GT)9	18	5115	5132	AGAGGGACGTTTTTGCAATG	60.11	20	GAGATGGAGAACATCCTGGG	59.46	20	176	5002	5177	AGAGGGACGTTTTTGCAATG	60.11	20	GGAGATGGAGAACATCCTGG	59.46	20	177	5002	5178	CGTGCTGACCTCCTTGAACT	60.444	20	GAGATGGAGAACATCCTGGG	59.46	20	156	5022	5177	gi|326675624|ref|XP_001333850.4|	535	1e-149	PREDICTED: protein FAM190B-like [Danio rerio]	sp|Q9H7U1|F190B_HUMAN	315	2e-84	Protein FAM190B OS=Homo sapiens GN=FAM190B PE=1 SV=2	--	--	--	--	--	--
Unigene0108342	1	p2	(CA)9	18	2664	2681	GGGATGTGCACAGACAACAC	60.013	20	GTGCTGCAGCCTTGATGTAA	60.019	20	268	2604	2871	GGGATGTGCACAGACAACAC	60.013	20	TGCTGCAGCCTTGATGTAAC	60.019	20	267	2604	2870	GGGATGTGCACAGACAACAC	60.013	20	GAAGGCAGTAGTTTGCGACC	59.882	20	128	2604	2731	--	--	--	--	--	--	--	--	--	--	--	--	--	--
Unigene0108573	1	p2	(AC)9	18	80	97	AGCGGCACAGTAAATGACCT	59.763	20	TCTCTTTCCTGCTTCTCCCA	60.065	20	156	40	195	AGCGGCACAGTAAATGACCT	59.763	20	AGTCAGCCAAACAACAGGCT	59.914	20	261	40	300	AGCGGCACAGTAAATGACCT	59.763	20	CCAAACAACAGGCTGCACTA	59.904	20	255	40	294	--	--	--	--	--	--	--	--	--	--	--	--	--	--
Unigene0108741	2	p2	(GT)9	18	665	682	TTAGAGGCCAGGCTGGATTA	59.801	20	CACCAACACACCAACACACA	59.923	20	165	562	726	TTAGAGGCCAGGCTGGATTA	59.801	20	CACACCAACACACCAACACA	59.923	20	167	562	728	TTAGAGGCCAGGCTGGATTA	59.801	20	AGTTTCCTCAGACGCAGCTC	59.751	20	271	562	832	gi|348537686|ref|XP_003456324.1|	717	0	PREDICTED: dnaJ homolog subfamily B member 11-like [Oreochromis niloticus]	sp|Q5RAJ6|DJB11_PONAB	630	1e-179	DnaJ homolog subfamily B member 11 OS=Pongo abelii GN=DNAJB11 PE=2 SV=1	YNL064c	179	2e-44	COG0484	DnaJ-class molecular chaperone with C-terminal Zn finger domain	K09517
Unigene0108742	3	p2	(AC)9	18	1421	1438	TCCACACCTTTGTTCTGCTG	59.873	20	CCACGCTTCTTGTCACTGAA	60.025	20	270	1245	1514	TTTGTTCTGCTGTGCTTTCG	60.172	20	CCACGCTTCTTGTCACTGAA	60.025	20	262	1253	1514	TGTTCTGCTGTGCTTTCGTC	60.183	20	CCACGCTTCTTGTCACTGAA	60.025	20	260	1255	1514	--	--	--	--	--	--	--	--	--	--	--	--	--	--
Unigene0108925	1	p2	(GT)10	20	5148	5167	ACAAAATAGTGGGCGAAACG	59.996	20	CCCTCTTCGCTGTAGAATGG	59.83	20	212	4983	5194	GCTCAAAGCTTTCACCTGCT	59.763	20	CCCTCTTCGCTGTAGAATGG	59.83	20	277	4918	5194	CACAACAAAATAGTGGGCGA	59.585	20	CCCTCTTCGCTGTAGAATGG	59.83	20	216	4979	5194	gi|348506074|ref|XP_003440585.1|	2303	0	PREDICTED: DENN domain-containing protein 5B [Oreochromis niloticus]	sp|Q6NXD8|DEN5B_DANRE	1570	0	DENN domain-containing protein 5B OS=Danio rerio GN=dennd5b PE=2 SV=2	--	--	--	--	--	--
Unigene0109233	1	p2	(GT)9	18	323	340	CTGTGGAATTCAAGAGGGGA	60.042	20	TTTTCTGCCATTTTTCTGGC	60.188	20	251	228	478	TGTGGAATTCAAGAGGGGAG	60.042	20	TTTTCTGCCATTTTTCTGGC	60.188	20	250	229	478	ACTGTGGAATTCAAGAGGGG	58.989	20	TTTTCTGCCATTTTTCTGGC	60.188	20	252	227	478	--	--	--	--	--	--	--	--	--	--	--	--	--	--
Unigene0109643	1	p2	(AC)9	18	724	741	CGACCGACTCGTTACAGACA	59.897	20	GAGTGTGTGAGTGTGTGAGTGC	59.414	22	222	545	766	AATACTTGTCGGGGGATGTG	59.67	20	GAGTGTGTGAGTGTGTGAGTGC	59.414	22	172	595	766	CAATACTTGTCGGGGGATGT	59.67	20	GAGTGTGTGAGTGTGTGAGTGC	59.414	22	173	594	766	--	--	--	--	--	--	--	--	--	--	--	--	--	--
Unigene0110112	1	p2	(TG)9	18	684	701	TGGGTCACTGCTCCATCATA	60.072	20	TTCATGTTCATCAACCCACAA	59.808	21	182	555	736	TGGGTCACTGCTCCATCATA	60.072	20	TTTCATGTTCATCAACCCACA	59.808	21	183	555	737	GGACTCCAACCACCTTAAACC	59.721	21	TCAATAATGGAGGAGGCAGG	60.029	20	269	660	928	--	--	--	--	--	--	--	--	--	--	--	--	--	--
Unigene0110949	1	p2	(AC)9	18	205	222	CTGCCATGCTTGTTGTTTGT	59.764	20	CTGGCCAAGAGAAGAGGGTT	60.756	20	128	164	291	AATATGCAACAGAATGGGGG	59.645	20	CTGGCCAAGAGAAGAGGGTT	60.756	20	272	20	291	GCAGTCAGGAGAGAACCCTG	59.986	20	AAGGTGCTCAGTGGCTATGAA	59.89	21	272	147	418	--	--	--	--	--	--	--	--	--	--	--	--	--	--
Unigene0111016	2	p2	(CA)9	18	207	224	CACTCTCACACACACAGGCA	59.454	20	AGGGTATGAACATGTGCGCT	60.547	20	139	180	318	TGGTGGGAGGAGACAGGTAT	59.38	20	AGGGTATGAACATGTGCGCT	60.547	20	265	54	318	ATGGTGGGAGGAGACAGGTA	59.38	20	AGGGTATGAACATGTGCGCT	60.547	20	266	53	318	gi|348527264|ref|XP_003451139.1|	389	1e-106	PREDICTED: septin-5-like [Oreochromis niloticus]	sp|Q9Z2Q6|SEPT5_MOUSE	342	3e-93	Septin-5 OS=Mus musculus GN=Sept5 PE=1 SV=2	SPAC4F10.11	126	7e-29	COG5019	Septin family protein	K04557
Unigene0111231	2	p2	(AC)10	20	478	497	CTGCAGGCTGTTCATTTCAA	59.988	20	GAGAGGTTTCCAAGCTGCAC	59.997	20	130	450	579	CGCACCTCTCATGTTGAAGA	59.984	20	GAGAGGTTTCCAAGCTGCAC	59.997	20	211	369	579	CTCGCACCTCTCATGTTGAA	59.984	20	GAGAGGTTTCCAAGCTGCAC	59.997	20	213	367	579	gi|301631545|ref|XP_002944858.1|	177	2e-42	PREDICTED: 30S ribosomal protein S12-like [Xenopus (Silurana) tropicalis]	sp|Q96033|RT12_HELAN	253	5e-66	Ribosomal protein S12, mitochondrial OS=Helianthus annuus GN=RPS12 PE=2 SV=1	TP0243	174	9e-43	COG0048	Ribosomal protein S12	--
Unigene0111816	2	p2	(GT)10	20	364	383	TTGTTCATTTTGTCAGGGCA	60.088	20	TGAAGTTGAAGGCCATTTCC	60.051	20	231	294	524	CGTGCTTTGTCTGCAGTTGT	60.096	20	TCAAACCTACAGGTCTGCCC	60.111	20	239	179	417	TTGTTCATTTTGTCAGGGCA	60.088	20	ACTTCATGAACTCGTCGGCT	59.874	20	177	294	470	gi|176040883|gb|ACB72735.1|	902	0	adenylosuccinate lyase [Ctenopharyngodon idella] >gi|176040918|gb|ACB72736.1| adenylosuccinate lyase [Ctenopharyngodon idella]	sp|P21265|PUR8_CHICK	792	0	Adenylosuccinate lyase OS=Gallus gallus GN=ADSL PE=2 SV=2	YLR359w	620	3e-177	COG0015	Adenylosuccinate lyase	K01756
Unigene0112363	2	p2	(TG)9	18	155	172	CTGCCCATAATCCATTTTTGT	58.82	21	CATCAGTGCCTTACAGGGGT	59.989	20	241	66	306	CTGCCCATAATCCATTTTTGT	58.82	21	GCGAACGTCTCCTCTACCTG	60.012	20	269	66	334	CTGCCCATAATCCATTTTTGT	58.82	21	CGAACGTCTCCTCTACCTGC	60.012	20	268	66	333	--	--	--	--	--	--	--	--	--	--	--	--	--	--
Unigene0113014	1	p2	(GT)10	20	117	136	AGTAGCTGCAGCAGGACGTT	60.223	20	GCACACACACACCATCACAA	60.053	20	149	11	159	AGTAGCTGCAGCAGGACGTT	60.223	20	TTGCACACACACACCATCAC	60.053	20	151	11	161	AGCCTGCCAGCTGTGATATT	59.866	20	GGTGGGATACGGAGAACGTA	59.813	20	256	83	338	gi|186688051|gb|ACC86111.1|	879	0	cathepsin F [Paralichthys olivaceus]	sp|Q9R013|CATF_MOUSE	442	3e-123	Cathepsin F OS=Mus musculus GN=Ctsf PE=2 SV=1	AF1946_2	79.3	2e-14	COG4870	Cysteine protease	K01373
Unigene0113262	1	p2	(GT)9	18	462	479	CTTCTCCCCAACTAACGCAG	59.869	20	AAATGGGAACAAAACATGCC	59.668	20	228	324	551	CTTCTCCCCAACTAACGCAG	59.869	20	CAAAACATGCCAGAGATGGA	59.648	20	219	324	542	ATTGTTCCTCTCCCTTCGCT	60.212	20	AAATGGGAACAAAACATGCC	59.668	20	183	369	551	--	--	--	--	--	--	--	--	--	--	--	--	--	--
Unigene0114247	1	p2	(TG)9	18	131	148	AGCAGCAATCTCTGCTGTCA	59.887	20	CAACTGGGAGGGAGATGAAA	60.042	20	123	73	195	AGCAGCAATCTCTGCTGTCA	59.887	20	CATCCTCCTGGCTTTGATGT	60.073	20	177	73	249	AGCAGCAATCTCTGCTGTCA	59.887	20	ATCCTCCTGGCTTTGATGTG	60.073	20	176	73	248	--	--	--	--	--	--	--	--	--	--	--	--	--	--
Unigene0114410	1	p2	(AC)9	18	63	80	TCCTGTTCGATCTTTGTCCA	59.215	20	AAGCAGCCTGAAGAAAGCAG	59.898	20	151	6	156	TCCTGTTCGATCTTTGTCCA	59.215	20	GCAGCCTGAAGAAAGCAGAG	60.419	20	149	6	154	TCCTGTTCGATCTTTGTCCA	59.215	20	AGCAGCCTGAAGAAAGCAGA	60.419	20	150	6	155	--	--	--	--	--	--	--	--	--	--	--	--	--	--
Unigene0114814	1	p2	(AC)10	20	2632	2651	TGTGGAAGATGCTCAACAGG	59.831	20	CCGATTCAAAACAGCTCCAT	60.074	20	258	2580	2837	TGTGGAAGATGCTCAACAGG	59.831	20	TCAAAACAGCTCCATGTCCA	60.24	20	253	2580	2832	GCACTGGATCCGGAGATAAA	60.036	20	GCAGAGTCTCAGCAGCTCAA	59.603	20	161	2533	2693	gi|213510954|ref|NP_001133348.1|	213	3e-53	CR054 protein [Salmo salar] >gi|209151332|gb|ACI33071.1| C18orf54 precursor [Salmo salar]	--	--	--	--	--	--	--	--	--	--
Unigene0115617	1	p2	(TG)9	18	1114	1131	ACGAGGCACAAGAGACAGGT	59.907	20	CAGCACAATCTCTATCGGCA	59.972	20	151	1028	1178	ATTTCCAGCTCGTCATCGTC	60.226	20	CAGCACAATCTCTATCGGCA	59.972	20	280	899	1178	ACGAGGCACAAGAGACAGGT	59.907	20	AATCTCTATCGGCAGGGGAC	60.431	20	145	1028	1172	gi|348527108|ref|XP_003451061.1|	323	1e-86	PREDICTED: proheparin-binding EGF-like growth factor-like [Oreochromis niloticus]	sp|P31955|AREG_MOUSE	83.6	3e-15	Amphiregulin OS=Mus musculus GN=Areg PE=2 SV=1	--	--	--	--	--	K09782
Unigene0115640	1	p2	(GT)9	18	1244	1261	CCACGCTTCTTGTCACTGAA	60.025	20	CACAGCTGACGCTCTCTGAC	59.922	20	259	1166	1424	CCACGCTTCTTGTCACTGAA	60.025	20	GCTTTCCTCTCATCAGCCAG	60.096	20	221	1166	1386	CCACGCTTCTTGTCACTGAA	60.025	20	CTTTCCTCTCATCAGCCAGC	60.096	20	220	1166	1385	--	--	--	--	--	--	--	--	--	--	--	--	--	--
Unigene0116877	1	p2	(GT)10	20	770	789	CCCACACTTTGGGAAACACT	59.861	20	TGGATTACAGGCTCGACTCA	59.394	20	158	667	824	GCGCACCACCTACAGTACCT	60.201	20	TGGATTACAGGCTCGACTCA	59.394	20	202	623	824	GCGCACCACCTACAGTACCT	60.201	20	CTCGACTCAAGAGTCTGCCA	59.283	20	191	623	813	--	--	--	--	--	--	--	--	--	--	--	--	--	--
Unigene0117057	2	p2	(CA)9	18	360	377	TGTCAGACCCCACACGTTTA	60.001	20	ACCAGGAACGTCATGCTACC	59.997	20	236	290	525	GTCCAGTAATTTGCTCCCCA	59.933	20	ACCAGGAACGTCATGCTACC	59.997	20	262	264	525	AAAGCTGTCAGACCCCACAC	60.159	20	ACCAGGAACGTCATGCTACC	59.997	20	241	285	525	gi|167533748|ref|XP_001748553.1|	54.7	3e-06	hypothetical protein [Monosiga brevicollis MX1] >gi|163773072|gb|EDQ86717.1| predicted protein [Monosiga brevicollis MX1]	--	--	--	--	--	--	--	--	--	--
Unigene0117364	1	p2	(AC)9	18	569	586	TACCACCGGGTACCATAGGA	60.066	20	TGTAGGTGTAGGTGAGGGGG	59.837	20	190	420	609	ACCGGGTACCATAGGAGAGG	60.204	20	TGTAGGTGTAGGTGAGGGGG	59.837	20	186	424	609	CGGGTACCATAGGAGAGGGT	60.204	20	TGTAGGTGTAGGTGAGGGGG	59.837	20	184	426	609	--	--	--	--	--	--	--	--	--	--	--	--	--	--
Unigene0117382	1	p2	(CA)10	20	147	166	TCCACTCGTGTATCTGTCGC	59.862	20	GTCGGTGCCTTTATTCTTGC	59.713	20	267	59	325	TCCACTCGTGTATCTGTCGC	59.862	20	GGTCGGTGCCTTTATTCTTG	59.569	20	268	59	326	ATCTGTCGCTGTCACCACAA	60.319	20	GTCGGTGCCTTTATTCTTGC	59.713	20	256	70	325	gi|348529910|ref|XP_003452455.1|	55.8	9e-07	PREDICTED: hypothetical protein LOC100709192 [Oreochromis niloticus]	--	--	--	--	--	--	--	--	--	--
Unigene0117676	2	p2	(AC)9	18	355	372	AGTCATGTTGCAGCTCATGG	59.862	20	CGAGGGATGCAGAAAGAAAG	59.948	20	266	211	476	GATGTTTTCAAGCGGCAGAT	60.221	20	GCAAAAGCTGCTACACCCTC	60.022	20	133	277	409	AAGCGGCAGATTTACACGTT	59.775	20	GCAAAAGCTGCTACACCCTC	60.022	20	124	286	409	--	--	--	--	--	--	--	--	--	--	--	--	--	--
Unigene0117718	1	p2	(GT)10	20	358	377	TCCCGACTACAACTTCCCTG	60.103	20	ACTCCCACCAGTTGTTCCAC	59.859	20	246	255	500	TCCCGACTACAACTTCCCTG	60.103	20	GTTCCACTCCCACCAGTTGT	59.859	20	251	255	505	TCCCGACTACAACTTCCCTG	60.103	20	TGGCAAGTGTGACATCTGGT	60.162	20	269	255	523	gi|348514975|ref|XP_003445015.1|	753	0	PREDICTED: adiponectin receptor protein 2-like [Oreochromis niloticus]	sp|Q8BQS5|ADR2_MOUSE	615	4e-175	Adiponectin receptor protein 2 OS=Mus musculus GN=Adipor2 PE=2 SV=2	SPBC12C2.09c	205	2e-52	COG1272	Predicted membrane protein, hemolysin III homolog	K07297
Unigene0117862	1	p2	(CA)9	18	848	865	CTTCATCCTTGCACCCATTT	59.933	20	TTCTCTGTCCCTGCATCCTT	59.803	20	218	783	1000	TATCCCCACTTCATCCTTGC	59.894	20	CAGAAATGGCTTGGGAGAAA	60.184	20	193	775	967	AAAAAGGCTTCCTATCCCCA	59.903	20	TTCTCTGTCCCTGCATCCTT	59.803	20	238	763	1000	gi|317420009|emb|CBN82045.1|	374	1e-102	Ubiquitin-protein ligase E3C [Dicentrarchus labrax]	sp|Q80U95|UBE3C_MOUSE	343	2e-93	Ubiquitin-protein ligase E3C OS=Mus musculus GN=Ube3c PE=2 SV=2	SPAC167.07c	194	3e-49	COG5021	Ubiquitin-protein ligase	K10589
Unigene0118159	1	p2	(TC)11	22	58	79	TTGCAAGAGGGTGTGTTATTG	58.687	21	TCGATCTTTTTGTCTGGCCT	59.813	20	137	15	151	CTTGCAAGAGGGTGTGTTATTG	59.671	22	TCGATCTTTTTGTCTGGCCT	59.813	20	138	14	151	ATTGCTTCCCATGTCTTGC	58.659	19	TCGATCTTTTTGTCTGGCCT	59.813	20	152	0	151	--	--	--	--	--	--	--	--	--	--	--	--	--	--
Unigene0118410	2	p2	(GT)9	18	307	324	AACCAATCAGAAGCAGCGAT	59.843	20	CCAAGGAGGGACTGAATCAA	60.042	20	217	147	363	CCTGTGGGATCTCCTTGCTA	60.21	20	CCAAGGAGGGACTGAATCAA	60.042	20	151	213	363	AAAACGCCCAAACTAAGCAA	59.758	20	CCAAGGAGGGACTGAATCAA	60.042	20	235	129	363	--	--	--	--	--	--	--	--	--	--	--	--	--	--
Unigene0118448	1	p2	(GA)11	22	1584	1605	ACAATCGCCTGAAGATGACC	60.081	20	TGTCCTTCCCTCACTTTGCT	59.844	20	158	1476	1633	ACAATCGCCTGAAGATGACC	60.081	20	GTCCTTCCCTCACTTTGCTG	59.844	20	157	1476	1632	ACAATCGCCTGAAGATGACC	60.081	20	CTGTCCTTCCCTCACTTTGC	59.844	20	159	1476	1634	gi|348521696|ref|XP_003448362.1|	676	0	PREDICTED: ras association domain-containing protein 1-like [Oreochromis niloticus]	sp|Q99MK9|RASF1_MOUSE	400	1e-110	Ras association domain-containing protein 1 OS=Mus musculus GN=Rassf1 PE=2 SV=1	--	--	--	--	--	K09850
Unigene0118783	3	p2	(AC)9	18	1162	1179	GTCCTCGGTGCTAAATGGTC	59.556	20	CTCAGAGTCAATCTTGGGCA	58.957	20	249	1017	1265	GTCCTCGGTGCTAAATGGTC	59.556	20	ACTCAGAGTCAATCTTGGGCA	59.859	21	250	1017	1266	TTCTTCTCGGATAAATGCTGC	59.447	21	ACTGACAGTCCCTCTGGCAT	59.713	20	273	1138	1410	--	--	--	--	--	--	--	--	--	--	--	--	--	--
Unigene0118798	2	p6	(CAGCTC)14	84	8575	8658	CTTCTTCTTCCTGCCCTGTG	59.982	20	CCCTGGATAGGGATCTGGTT	60.147	20	242	8542	8783	CTCCTTCTTCTTCCTGCCCT	59.95	20	CCCTGGATAGGGATCTGGTT	60.147	20	245	8539	8783	CTTCTTCTTCCTGCCCTGTG	59.982	20	GCTTCAACTCCATGGCTGAT	60.226	20	272	8542	8813	gi|221104693|ref|XP_002168168.1|	197	2e-58	PREDICTED: similar to expressed protein, partial [Hydra magnipapillata]	sp|P05790|FIBH_BOMMO	80.1	3e-13	Fibroin heavy chain OS=Bombyx mori GN=FIBH PE=1 SV=4	XF0818	62.8	2e-10	COG2730	Endoglucanase	--
Unigene0118803	2	p6	(CAGCTC)18	108	10250	10357	CTTCTTCTTCCTGCCCTGTG	59.982	20	CCCTGGATAGGGATCTGGTT	60.147	20	266	10217	10482	CTCCTTCTTCTTCCTGCCCT	59.95	20	CCCTGGATAGGGATCTGGTT	60.147	20	269	10214	10482	CTTCTTCTTCCTGCCCTGTG	59.982	20	GGTCTGGATCTGGAGCTGAA	60.349	20	188	10217	10404	gi|326431928|gb|EGD77498.1|	223	2e-55	serine/threonine protein kinase [Salpingoeca sp. ATCC 50818]	sp|P05790|FIBH_BOMMO	92.8	5e-17	Fibroin heavy chain OS=Bombyx mori GN=FIBH PE=1 SV=4	XF0818	72.4	2e-11	COG2730	Endoglucanase	--
Unigene0118812	2	p6	(CAGCTC)10	60	10226	10285	CTTCTTCTTCCTGCCCTGTG	59.982	20	CCCTGGATAGGGATCTGGTT	60.147	20	218	10193	10410	CTCCTTCTTCTTCCTGCCCT	59.95	20	CCCTGGATAGGGATCTGGTT	60.147	20	221	10190	10410	CTTCTTCTTCCTGCCCTGTG	59.982	20	GCTTCAACTCCATGGCTGAT	60.226	20	248	10193	10440	gi|326431928|gb|EGD77498.1|	223	2e-55	serine/threonine protein kinase [Salpingoeca sp. ATCC 50818]	sp|Q9FPQ6|GP1_CHLRE	53.5	7e-10	Vegetative cell wall protein gp1 OS=Chlamydomonas reinhardtii GN=GP1 PE=2 SV=1	XF0818	52.4	2e-07	COG2730	Endoglucanase	--
Unigene0118815	2	p6	(CAGCTC)12	72	9476	9547	CTTCTTCTTCCTGCCCTGTG	59.982	20	CCCTGGATAGGGATCTGGTT	60.147	20	230	9443	9672	CTCCTTCTTCTTCCTGCCCT	59.95	20	CCCTGGATAGGGATCTGGTT	60.147	20	233	9440	9672	CTTCTTCTTCCTGCCCTGTG	59.982	20	GCTTCAACTCCATGGCTGAT	60.226	20	260	9443	9702	gi|221104693|ref|XP_002168168.1|	247	1e-62	PREDICTED: similar to expressed protein, partial [Hydra magnipapillata]	sp|Q9FPQ6|GP1_CHLRE	59.7	1e-11	Vegetative cell wall protein gp1 OS=Chlamydomonas reinhardtii GN=GP1 PE=2 SV=1	XF0818	57	9e-09	COG2730	Endoglucanase	--
Unigene0118823	2	p6	(CAGCTC)9	54	9221	9274	CTTCTTCTTCCTGCCCTGTG	59.982	20	CCCTGGATAGGGATCTGGTT	60.147	20	212	9188	9399	CTCCTTCTTCTTCCTGCCCT	59.95	20	CCCTGGATAGGGATCTGGTT	60.147	20	215	9185	9399	CTTCTTCTTCCTGCCCTGTG	59.982	20	GCTTCAACTCCATGGCTGAT	60.226	20	242	9188	9429	gi|326431928|gb|EGD77498.1|	223	2e-55	serine/threonine protein kinase [Salpingoeca sp. ATCC 50818]	sp|Q9FPQ6|GP1_CHLRE	50.1	7e-09	Vegetative cell wall protein gp1 OS=Chlamydomonas reinhardtii GN=GP1 PE=2 SV=1	XF0818	49.7	1e-06	COG2730	Endoglucanase	--
Unigene0119001	1	p2	(AG)11	22	1560	1581	GGGGAGGAAAAACTCCCTTT	60.637	20	GCTTGGAGAGCTGGTTTCTG	60.134	20	248	1427	1674	ACCGGTTGGGTTTAGGAGAA	60.714	20	GCTTGGAGAGCTGGTTTCTG	60.134	20	172	1503	1674	GGGGAGGAAAAACTCCCTTT	60.637	20	AGACAAGGCTTGGAGAGCTG	59.745	20	255	1427	1681	--	--	--	--	--	--	--	--	--	--	--	--	--	--
Unigene0119162	1	p2	(GT)10	20	3313	3332	CCATTTTCCCCTCTAGCTCC	60.032	20	CTGTGTCACCACCCTCAGTG	60.198	20	254	3187	3440	CCATTTTCCCCTCTAGCTCC	60.032	20	TCCGCAGCACTCCTAATACC	60.235	20	185	3187	3371	TTGCTTTGTTCACACTTCGC	60.035	20	TCCGCAGCACTCCTAATACC	60.235	20	276	3096	3371	gi|44885320|dbj|BAD11989.1|	1455	0	furin endoprotease [Oryzias latipes]	sp|P29119|FURI1_XENLA	1042	0	Furin-1 OS=Xenopus laevis GN=furin PE=2 SV=1	SPBC16H5.02	465	6e-130	COG0205	6-phosphofructokinase	K01349
Unigene0119462	1	p2	(GA)11	22	2407	2428	GTGTTTCCAGCATAGCCGAT	60.103	20	GAAGTGCACTGAGGGGAGAG	59.986	20	256	2229	2484	GTGAGGCGGAGTTAAACGAG	59.875	20	GAAGTGCACTGAGGGGAGAG	59.986	20	106	2379	2484	TGAGGCGGAGTTAAACGAGT	59.875	20	GAAGTGCACTGAGGGGAGAG	59.986	20	105	2380	2484	gi|348539478|ref|XP_003457216.1|	850	0	PREDICTED: actin-related protein 3B-like isoform 1 [Oreochromis niloticus]	sp|Q9P1U1|ARP3B_HUMAN	785	0	Actin-related protein 3B OS=Homo sapiens GN=ACTR3B PE=1 SV=1	SPAC630.03	484	7e-136	COG5277	Actin and related proteins	--
Unigene0119508	2	p2	(GT)9	18	1325	1342	CTCTTAGTTTCAGCGTCCCG	60.008	20	CAACACCATCACCTCACCTG	59.997	20	234	1159	1392	CTCTTAGTTTCAGCGTCCCG	60.008	20	GTGCAACACCATCACCTCAC	60.013	20	237	1159	1395	CTCTTAGTTTCAGCGTCCCG	60.008	20	GTCCACAGTGCAACACCATC	60.013	20	244	1159	1402	gi|348537478|ref|XP_003456221.1|	116	3e-24	PREDICTED: E3 ubiquitin-protein ligase RNF220 [Oreochromis niloticus]	sp|Q6PDX6|RN220_MOUSE	110	3e-23	E3 ubiquitin-protein ligase Rnf220 OS=Mus musculus GN=Rnf220 PE=1 SV=1	--	--	--	--	--	--
Unigene0119509	1	p2	(CA)9	18	2390	2407	CAACACCATCACCTCACCTG	59.997	20	CTCTTAGTTTCAGCGTCCCG	60.008	20	234	2339	2572	GTGCAACACCATCACCTCAC	60.013	20	CTCTTAGTTTCAGCGTCCCG	60.008	20	237	2336	2572	GTCCACAGTGCAACACCATC	60.013	20	CTCTTAGTTTCAGCGTCCCG	60.008	20	244	2329	2572	gi|348537478|ref|XP_003456221.1|	1184	0	PREDICTED: E3 ubiquitin-protein ligase RNF220 [Oreochromis niloticus]	sp|Q5VTB9|RN220_HUMAN	879	0	E3 ubiquitin-protein ligase RNF220 OS=Homo sapiens GN=RNF220 PE=1 SV=1	--	--	--	--	--	--
Unigene0119511	2	p2	(TG)9	18	2640	2657	GTTGGGTTCACATTGTGCTG	60.008	20	CAGCTCTGCCCTGGTTTTAC	59.875	20	228	2548	2775	GTTGGGTTCACATTGTGCTG	60.008	20	ACAGCTCTGCCCTGGTTTTA	59.875	20	229	2548	2776	TGTTGGGTTCACATTGTGCT	60.008	20	CAGCTCTGCCCTGGTTTTAC	59.875	20	229	2547	2775	gi|37678182|gb|AAP49009.1|	296	6e-78	transposase [Rana pipiens] >gi|39753972|tpg|DAA01561.1| TPA_exp: transposase [Rana pipiens]	sp|Q5R4J9|NAA15_PONAB	160	6e-38	N-alpha-acetyltransferase 15, NatA auxiliary subunit OS=Pongo abelii GN=NAA15 PE=2 SV=1	YDL040c	61.2	1e-08	COG0457	FOG: TPR repeat	--
Unigene0119722	1	p2	(AC)10	20	4499	4518	TGCAGGCTAACACACACACA	59.938	20	GTCCCACACTGAAGGGAAAA	59.943	20	192	4469	4660	GCCTCCACCAGTACCAACAT	59.851	20	GTCCCACACTGAAGGGAAAA	59.943	20	225	4436	4660	TGCAGGCTAACACACACACA	59.938	20	CTAGTGGAATGCTGGAAGGC	59.836	20	127	4469	4595	gi|348516667|ref|XP_003445859.1|	943	0	PREDICTED: rho guanine nucleotide exchange factor 9 [Oreochromis niloticus]	sp|Q58DL7|ARHG9_BOVIN	869	0	Rho guanine nucleotide exchange factor 9 OS=Bos taurus GN=ARHGEF9 PE=2 SV=1	SPCC645.07	74.3	2e-12	COG5422	RhoGEF, Guanine nucleotide exchange factor for Rho/Rac/Cdc42-like GTPases	--
Unigene0119873	1	p2	(AC)11	22	100	121	TGGGCCTTTCTAACCACTCA	60.626	20	GGTGCTAGTCTGAGGCGAAC	60.02	20	229	54	282	TGGGCCTTTCTAACCACTCA	60.626	20	CTCAGCCACAACTCGAACAA	60.025	20	208	54	261	TGGGCCTTTCTAACCACTCA	60.626	20	AGGTGCTAGTCTGAGGCGAA	60.156	20	230	54	283	gi|348528027|ref|XP_003451520.1|	854	0	PREDICTED: heterogeneous nuclear ribonucleoprotein K-like [Oreochromis niloticus]	sp|Q5ZIQ3|HNRPK_CHICK	694	0	Heterogeneous nuclear ribonucleoprotein K OS=Gallus gallus GN=HNRNPK PE=2 SV=1	--	--	--	--	--	K12886
Unigene0119900	1	p2	(TG)10	20	1344	1363	TGTTGAAATGGTGCGAATGT	59.972	20	TACACACTCCAGATCGCCTG	59.855	20	211	1308	1518	GTGTTGAAATGGTGCGAATG	59.972	20	TACACACTCCAGATCGCCTG	59.855	20	212	1307	1518	GTGTTGAAATGGTGCGAATG	59.972	20	CAACAGCAACAGGTCGGTAA	59.758	20	164	1307	1470	gi|348532991|ref|XP_003453989.1|	1026	0	PREDICTED: wiskott-Aldrich syndrome protein family member 3-like [Oreochromis niloticus]	sp|Q9UPY6|WASF3_HUMAN	600	2e-170	Wiskott-Aldrich syndrome protein family member 3 OS=Homo sapiens GN=WASF3 PE=1 SV=2	RSc2303	75.1	9e-13	COG4796	Type II secretory pathway, component HofQ	K06083
Unigene0119927	2	p2	(CA)9	18	1448	1465	TGCTGCTTCCACGCTAACTA	59.776	20	AGGTACCTCACCACGACCAG	60.026	20	160	1385	1544	TGCTGCTTCCACGCTAACTA	59.776	20	ACTGCCACAGGTACCTCACC	60.033	20	168	1385	1552	TCATCCAATCACAAAGCAGC	59.805	20	GACTCTATGCACACAGGCCA	59.862	20	248	1248	1495	gi|317418635|emb|CBN80673.1|	672	0	Cpne1 protein [Dicentrarchus labrax]	sp|O75131|CPNE3_HUMAN	506	2e-142	Copine-3 OS=Homo sapiens GN=CPNE3 PE=1 SV=1	--	--	--	--	--	--
Unigene0119928	2	p2	(GT)9	18	254	271	AGGTACCTCACCACGACCAG	60.026	20	AGCGACATCCAGGCTACACT	59.898	20	275	174	448	AGGTACCTCACCACGACCAG	60.026	20	CGACATCCAGGCTACACTGA	59.855	20	273	174	446	ACAGGTACCTCACCACGACC	59.883	20	AGCGACATCCAGGCTACACT	59.898	20	277	172	448	--	--	--	--	--	--	--	--	--	--	--	--	--	--
Unigene0120045	1	p2	(AC)9	18	2512	2529	GTACCGCTTGTCCCTCTCAC	59.727	20	CAGGTGATGAGTGGCTGTGT	59.738	20	147	2446	2592	CCCTCTCACGTGTTCACAAA	59.72	20	CAGGTGATGAGTGGCTGTGT	59.738	20	136	2457	2592	TTGTCCCTCTCACGTGTTCA	60.285	20	CAGGTGATGAGTGGCTGTGT	59.738	20	140	2453	2592	gi|348522568|ref|XP_003448796.1|	347	3e-93	PREDICTED: suppressor of cytokine signaling 2-like [Oreochromis niloticus]	sp|Q7YRV6|SOCS2_PIG	216	1e-54	Suppressor of cytokine signaling 2 OS=Sus scrofa GN=SOCS2 PE=2 SV=1	--	--	--	--	--	K04695
Unigene0120720	1	p2	(GT)9	18	556	573	AACACAGCCACAGCAACAAG	59.946	20	CTTATCAGCTGGACCAAGCC	59.836	20	135	497	631	AACACAGCCACAGCAACAAG	59.946	20	TTATCAGCTGGACCAAGCCT	59.836	20	134	497	630	AACACAGCCACAGCAACAAG	59.946	20	CAGCTTCACCATGTCCAGAA	59.831	20	196	497	692	--	--	--	--	--	--	--	--	--	--	--	--	--	--
Unigene0120853	1	p2	(CA)9	18	841	858	TTGTCAGCGATCAACTGGAG	59.984	20	TATATGTGAACCACAGCGCC	59.572	20	249	743	991	GTTTGTGCAAGCGAGTGTGT	59.953	20	TATATGTGAACCACAGCGCC	59.572	20	214	778	991	GTTGTCAGCGATCAACTGGA	59.837	20	TATATGTGAACCACAGCGCC	59.572	20	250	742	991	--	--	--	--	--	--	--	--	--	--	--	--	--	--
Unigene0120856	1	p2	(TG)10	20	1708	1727	GAAGAGGAAGGGAGAGGTGG	60.186	20	CATCTTCGTCACATGGGAAA	59.496	20	261	1611	1871	GGAAGAGGAAGGGAGAGGTG	60.186	20	CATCTTCGTCACATGGGAAA	59.496	20	262	1610	1871	GAAGCAGGATCTGTCCAAGC	59.957	20	AAAACTGGCAATGATCAGCA	59.276	20	202	1563	1764	gi|348531138|ref|XP_003453067.1|	577	1e-163	PREDICTED: ribosome production factor 2 homolog [Oreochromis niloticus]	sp|Q2YDN6|RPF2_BOVIN	480	2e-134	Ribosome production factor 2 homolog OS=Bos taurus GN=RPF2 PE=2 SV=1	SPAC926.08c	258	2e-68	COG5106	Uncharacterized conserved protein	K14847
Unigene0121129	1	p2	(CA)9	18	3859	3876	AGATGTCGATGGTGGAGAGC	60.231	20	ACCAGGAACGTCATGCTACC	59.997	20	278	3747	4024	ACAGACAACAAAAGGCCTCG	60.291	20	ACCAGGAACGTCATGCTACC	59.997	20	218	3807	4024	ACAGACAACAAAAGGCCTCG	60.291	20	ATACAAAGGAGGGGTGGAGG	60.183	20	265	3807	4071	gi|348522312|ref|XP_003448669.1|	416	1e-114	PREDICTED: cholesterol 25-hydroxylase-like [Oreochromis niloticus]	sp|Q5PRC0|CH25H_DANRE	218	3e-55	Cholesterol 25-hydroxylase-like protein OS=Danio rerio GN=ch25h PE=2 SV=1	SPAC630.08c	106	4e-22	COG3000	Sterol desaturase	K10223
Unigene0121726	1	p2	(AC)9	18	1263	1280	GGTGTCTGTCCTGTCTGGGT	60.006	20	ACCAGTCCTGTCCTCGATCA	60.678	20	224	1123	1346	ACCCATGTGGTGTCTGTCCT	60.291	20	ACCAGTCCTGTCCTCGATCA	60.678	20	232	1115	1346	GACCTGAGACCTGGTTGTCC	59.534	20	ACCAGTCCTGTCCTCGATCA	60.678	20	173	1174	1346	gi|348541359|ref|XP_003458154.1|	643	0	PREDICTED: transmembrane protein 129-like [Oreochromis niloticus]	sp|Q6PD82|TM129_DANRE	525	4e-148	Transmembrane protein 129 OS=Danio rerio GN=tmem129 PE=2 SV=1	--	--	--	--	--	--
Unigene0122119	1	p2	(GT)9	18	1604	1621	GGACAAAGGCTCATGGATGT	59.934	20	CATGGATGCACAGGTCAAAT	59.374	20	234	1413	1646	TTAGGGACAAAGGCTCATGG	60.066	20	CATGGATGCACAGGTCAAAT	59.374	20	238	1409	1646	GGACAAAGGCTCATGGATGT	59.934	20	TGGATGCACAGGTCAAATCT	59.09	20	232	1413	1644	gi|125831156|ref|XP_683105.2|	703	0	PREDICTED: rho guanine nucleotide exchange factor 15 [Danio rerio]	sp|O94989|ARHGF_HUMAN	422	6e-117	Rho guanine nucleotide exchange factor 15 OS=Homo sapiens GN=ARHGEF15 PE=1 SV=4	--	--	--	--	--	--
Unigene0122252	1	p2	(GT)10	20	1849	1868	GCAGTTTCTCTCTTCCCCCT	59.817	20	TGGAAAAAGAAGGAGGGGTT	59.912	20	254	1793	2046	GCAGTTTCTCTCTTCCCCCT	59.817	20	GGAGGGGTTACACTCACCAA	59.82	20	243	1793	2035	GCAGTTTCTCTCTTCCCCCT	59.817	20	GGGGTTACACTCACCAAGGA	59.82	20	240	1793	2032	--	--	--	--	--	--	--	--	--	--	--	--	--	--
Unigene0122914	2	p2	(AC)10	20	271	290	GCACACGAAACCATTCACAC	60.016	20	GTGCCTGAGAAAATGTGCCT	60.263	20	170	228	397	GCACACGAAACCATTCACAC	60.016	20	ATCAAAGTTGAGCTGTGGGC	60.263	20	268	228	495	CACACATGCACAAGCACAAG	59.938	20	GTGCCTGAGAAAATGTGCCT	60.263	20	155	243	397	gi|68010379|ref|XP_670725.1|	54.7	4e-06	hypothetical protein [Plasmodium berghei strain ANKA] >gi|56486252|emb|CAI03177.1| hypothetical protein PB404290.00.0 [Plasmodium berghei]	--	--	--	--	--	--	--	--	--	--
Unigene0124219	1	c	(TG)6tttc(TG)10	36	1346	1381	AGAGATCACCTCCCTCCGAT	60.035	20	GACCTGGACTGGAGAGGACA	60.243	20	248	1256	1503	AGAGATCACCTCCCTCCGAT	60.035	20	GCAGTGACAGTGACGAGGAG	59.603	20	160	1256	1415	AGAGATCACCTCCCTCCGAT	60.035	20	CAGTGACAGTGACGAGGAGC	59.603	20	159	1256	1414	gi|348533037|ref|XP_003454012.1|	1147	0	PREDICTED: G protein-coupled receptor kinase 6-like [Oreochromis niloticus]	sp|P43250|GRK6_HUMAN	1001	0	G protein-coupled receptor kinase 6 OS=Homo sapiens GN=GRK6 PE=1 SV=2	SPAC17G8.14c_2	177	1e-43	COG0515	Serine/threonine protein kinase	K08291
Unigene0124322	2	p2	(TG)9	18	541	558	GCTGTGTGAGTTCAGTTGCC	59.472	20	TCTTAACCACGAAACCCCAC	59.83	20	147	440	586	GCTGTGTGAGTTCAGTTGCC	59.472	20	GGCAAGCATTGCATAGAGGT	60.243	20	234	440	673	CTGTGTGAGTTCAGTTGCCC	59.31	20	TCTTAACCACGAAACCCCAC	59.83	20	146	441	586	--	--	--	--	--	--	--	--	--	--	--	--	--	--
Unigene0124363	1	p2	(AC)9	18	1012	1029	TTCCAACAAATAAGGCAGGC	60.074	20	GGAGTGGTGACTTTTGTGGG	60.399	20	280	801	1080	GCAGGCAGGTGGAACTAGAC	59.874	20	GGAGTGGTGACTTTTGTGGG	60.399	20	266	815	1080	ACAAATAAGGCAGGCAGGTG	60.132	20	GGAGTGGTGACTTTTGTGGG	60.399	20	275	806	1080	gi|348539862|ref|XP_003457408.1|	105	6e-21	PREDICTED: methylcrotonoyl-CoA carboxylase beta chain, mitochondrial-like [Oreochromis niloticus]	--	--	--	--	--	--	--	--	--	--
Unigene0124670	1	p2	(TG)10	20	245	264	GAAAGTTCTCGGTGTCCGTC	59.703	20	CCTGCAAGAAGATCAGCTCC	60.096	20	104	216	319	TGGAGGAAAGTTCTCGGTGT	59.697	20	CCTGCAAGAAGATCAGCTCC	60.096	20	109	211	319	GTGGAGGAAAGTTCTCGGTG	59.697	20	CCTGCAAGAAGATCAGCTCC	60.096	20	110	210	319	gi|348543015|ref|XP_003458979.1|	128	7e-29	PREDICTED: ATP-dependent RNA helicase A-like protein-like [Oreochromis niloticus]	sp|Q68FK8|DHX9_XENLA	113	4e-25	ATP-dependent RNA helicase A-like protein OS=Xenopus laevis GN=dhx9 PE=2 SV=1	--	--	--	--	--	K13184
Unigene0124959	1	p2	(TG)9	18	263	280	CCTCGTGGACAGACATCCTT	60.112	20	ATGTACGGCACGTTCCACAG	61.972	20	115	192	306	ACAGTCCAGGTGATGGTTCC	59.817	20	ATGTACGGCACGTTCCACAG	61.972	20	245	62	306	TCGTGGACAGACATCCTTCA	60.246	20	ATGTACGGCACGTTCCACAG	61.972	20	113	194	306	--	--	--	--	--	--	--	--	--	--	--	--	--	--
Unigene0125021	1	p2	(CA)9	18	1750	1767	AAACTGTTTGGTGTTTGGCA	59.072	20	AAACGTGATCAAAACAGGGC	59.978	20	233	1722	1954	AGCTGAGCTTTCTGGACTGC	59.898	20	GGCAGGACTGGGTAACACTT	59.065	20	278	1660	1937	AGCTGAGCTTTCTGGACTGC	59.898	20	TGTGACATCACATCAGGTGC	59.047	20	224	1660	1883	gi|348527012|ref|XP_003451013.1|	622	1e-176	PREDICTED: tuftelin-like [Oreochromis niloticus]	sp|P27628|TUFT1_BOVIN	211	2e-53	Tuftelin OS=Bos taurus GN=TUFT1 PE=2 SV=2	aq_1006	63.2	2e-09	COG0419	ATPase involved in DNA repair	--
Unigene0125557	1	p2	(AC)9	18	820	837	CATGACCAACACCAGAGACG	60.154	20	TCGTGAACAAACTGACGCTC	60.032	20	240	768	1007	ACCCAACCTCAGATGACGAC	59.969	20	GAGCACTGGAAGACCAGGAC	59.841	20	205	725	929	ACCCAACCTCAGATGACGAC	59.969	20	CTCCCTGAGACCAGAACGAC	59.835	20	182	725	906	gi|348540104|ref|XP_003457528.1|	739	0	PREDICTED: E3 ubiquitin-protein ligase parkin-like [Oreochromis niloticus]	sp|Q9WVS6|PRKN2_MOUSE	540	1e-152	E3 ubiquitin-protein ligase parkin OS=Mus musculus GN=Park2 PE=1 SV=1	SPAC6G10.11c_1	52.8	2e-06	COG5272	Ubiquitin	K04556
Unigene0125869	1	p2	(GT)10	20	518	537	ATGTGTGTGTTTGAGGAGCG	59.751	20	GTTCCACTCCCACCAGTTGT	59.859	20	259	407	665	ATGTGTGTGTTTGAGGAGCG	59.751	20	ACTCCCACCAGTTGTTCCAC	59.859	20	254	407	660	ATGTGTGTGTTTGAGGAGCG	59.751	20	TGGCAAGTGTGACATCTGGT	60.162	20	277	407	683	gi|348514975|ref|XP_003445015.1|	753	0	PREDICTED: adiponectin receptor protein 2-like [Oreochromis niloticus]	sp|Q8BQS5|ADR2_MOUSE	615	4e-175	Adiponectin receptor protein 2 OS=Mus musculus GN=Adipor2 PE=2 SV=2	SPBC12C2.09c	205	2e-52	COG1272	Predicted membrane protein, hemolysin III homolog	K07297
Unigene0125905	1	p2	(GT)9	18	280	297	AACGAGGCTGGATCAACAAC	60.119	20	GGCTGATGGCTAACAAGGTC	59.7	20	235	124	358	AACCTGGAGGAACATGGTTG	59.82	20	GGCTGATGGCTAACAAGGTC	59.7	20	267	92	358	TCCTTTGCGGCTCATTTTAC	60.209	20	GGCTGATGGCTAACAAGGTC	59.7	20	153	206	358	--	--	--	--	--	--	--	--	--	--	--	--	--	--
Unigene0126340	2	p2	(AC)9	18	2959	2976	CAACCAGGCAACGAGGTAAT	59.993	20	CGTGCCACACAGTTAGCATT	59.788	20	217	2807	3023	CAACCAGGCAACGAGGTAAT	59.993	20	TCCTTCGTGCCACACAGTTA	60.301	20	222	2807	3028	CAACCAGGCAACGAGGTAAT	59.993	20	TCGTGCCACACAGTTAGCAT	60.333	20	218	2807	3024	gi|348513261|ref|XP_003444161.1|	1004	0	PREDICTED: rap guanine nucleotide exchange factor 5-like [Oreochromis niloticus]	sp|Q8C0Q9|RPGF5_MOUSE	807	0	Rap guanine nucleotide exchange factor 5 OS=Mus musculus GN=Rapgef5 PE=2 SV=2	RSc2303	53.1	3e-06	COG4796	Type II secretory pathway, component HofQ	K08019
Unigene0127544	1	p2	(GT)9	18	161	178	CTGTTGGCATCAGCACAACT	59.905	20	GACCCTGGCTTTCCATGATA	59.894	20	224	11	234	CTGTTGGCATCAGCACAACT	59.905	20	CCCCTTCACAGACTTCTCCA	60.229	20	274	11	284	CCCGCTGACACATGACACTA	60.745	20	GACCCTGGCTTTCCATGATA	59.894	20	109	126	234	--	--	--	--	--	--	--	--	--	--	--	--	--	--
Unigene0127591	1	p2	(TG)9	18	28	45	CACATGTTGCTCATTTTTATTTTT	57.441	24	GCTTTCAGCTGTGTGGTGAA	60.032	20	214	0	213	CACATGTTGCTCATTTTTATTTTT	57.441	24	CAAATTTGGGAGGCTTTTCA	60.046	20	253	0	252	CACATGTTGCTCATTTTTATTTTT	57.441	24	TGGGAGGCTTTTCACTGACT	59.844	20	247	0	246	--	--	--	--	--	--	--	--	--	--	--	--	--	--
Unigene0127713	1	p2	(TG)9	18	432	449	TGTCATCTAGGCAGTGCGAC	60.016	20	TTGCATTGCTTTTTGCATTC	59.825	20	234	317	550	ACGCAGAAGACGCAGAAAGT	60.201	20	CTACACTTTTCCAGGGCAGG	59.728	20	205	402	606	GTGTGGATGTGACGCAGAAG	60.319	20	TTGCATTGCTTTTTGCATTC	59.825	20	160	391	550	--	--	--	--	--	--	--	--	--	--	--	--	--	--
Unigene0127843	1	p2	(AG)11	22	673	694	TAGTGGATCTGCAGCGTGTC	60.016	20	CTTTTCACCCCACCTCCTCT	60.48	20	277	451	727	GCTGGTCCTCATGGTGAAGT	60.12	20	CTTTTCACCCCACCTCCTCT	60.48	20	131	597	727	AGAGCTGCCATCCAACAACT	59.874	20	CTTTTCACCCCACCTCCTCT	60.48	20	103	625	727	gi|229366592|gb|ACQ58276.1|	341	2e-92	FK506-binding protein 11 precursor [Anoplopoma fimbria]	sp|Q9D1M7|FKB11_MOUSE	205	2e-52	Peptidyl-prolyl cis-trans isomerase FKBP11 OS=Mus musculus GN=Fkbp11 PE=2 SV=1	YDR519w	88.6	1e-17	COG0545	FKBP-type peptidyl-prolyl cis-trans isomerases 1	K09576
Unigene0128246	1	p2	(GT)9	18	593	610	TTGCTGTTCACATCCTCCTG	59.831	20	AAGGAGCGCTTGAATGTGTT	59.882	20	277	430	706	TTGTCGCGATAATGAAAGGA	59.257	20	AGGAGGAGGAGGAAGAGCAG	60.088	20	277	490	766	TGCTGTTCACATCCTCCTGT	59.261	20	AAGGAGCGCTTGAATGTGTT	59.882	20	276	431	706	gi|167525733|ref|XP_001747201.1|	54.7	4e-06	hypothetical protein [Monosiga brevicollis MX1] >gi|163774496|gb|EDQ88125.1| predicted protein [Monosiga brevicollis MX1]	--	--	--	--	--	--	--	--	--	--
Unigene0128444	1	p2	(TG)10	20	1251	1270	GCTCTTGGAGGACAAGCATC	59.957	20	GAAACATGAAACCAGCAGCA	59.847	20	221	1097	1317	CAGAGCACCAGGCATGTAAA	59.864	20	GAAACATGAAACCAGCAGCA	59.847	20	279	1039	1317	CACTGCGAGCTTGAAACAAA	60.172	20	GAAACATGAAACCAGCAGCA	59.847	20	195	1123	1317	--	--	--	--	--	--	--	--	--	--	--	--	--	--
Unigene0128881	1	p2	(TG)9	18	670	687	TGCCTCCGTATCCAGCTAAC	60.235	20	ACTTCACAGCGCCAATCTCT	60.02	20	276	594	869	TGCCTCCGTATCCAGCTAAC	60.235	20	AGAGCTTCTTGTCTCGCAGC	60.043	20	219	594	812	TGCCTCCGTATCCAGCTAAC	60.235	20	CTTCTTGTCTCGCAGCCTCT	59.891	20	215	594	808	gi|348533191|ref|XP_003454089.1|	171	4e-41	PREDICTED: ras-related C3 botulinum toxin substrate 1-like [Oreochromis niloticus]	sp|P60764|RAC3_MOUSE	166	2e-40	Ras-related C3 botulinum toxin substrate 3 OS=Mus musculus GN=Rac3 PE=1 SV=1	SPAC110.03	108	1e-23	COG1100	GTPase SAR1 and related small G proteins	K07861
Unigene0129351	1	p2	(GT)9	18	174	191	GCTTTATGCACCTGGAGACC	59.7	20	TGAGCCTGAGATGGGAGATT	59.761	20	252	11	262	GGCTTTATGCACCTGGAGAC	59.7	20	TGAGCCTGAGATGGGAGATT	59.761	20	253	10	262	GCTTTATGCACCTGGAGACC	59.7	20	GATGAGCCTGAGATGGGAGA	60.312	20	254	11	264	gi|348529045|ref|XP_003452025.1|	91.7	9e-17	PREDICTED: golgin subfamily A member 7B-like [Oreochromis niloticus]	sp|Q6AYQ1|GOGA7_RAT	88.6	1e-16	Golgin subfamily A member 7 OS=Rattus norvegicus GN=Golga7 PE=2 SV=1	--	--	--	--	--	--
Unigene0129458	1	p2	(AC)10	20	862	881	CACAGCTGACGCTCTCTGAC	59.922	20	GTGCACACAGGATTTGATCG	60.12	20	258	697	954	ACAGCTGACGCTCTCTGACA	59.922	20	GTGCACACAGGATTTGATCG	60.12	20	257	698	954	GCTTTCCTCTCATCAGCCAG	60.096	20	GTGCACACAGGATTTGATCG	60.12	20	220	735	954	--	--	--	--	--	--	--	--	--	--	--	--	--	--
Unigene0130186	1	p2	(AC)9	18	357	374	CATCACCTGGACATCACCTG	59.954	20	ACCAACGCTGATGAGACACA	60.319	20	260	174	433	GCGCTCTGTGTGTTTGTGTT	59.953	20	ATGCATAACCAACGCTGATG	59.572	20	171	270	440	CATCACCTGGACATCACCTG	59.954	20	CCAACGCTGATGAGACACAG	60.463	20	259	174	432	--	--	--	--	--	--	--	--	--	--	--	--	--	--
Unigene0131249	2	p2	(GT)9	18	754	771	TGTTGAGCCACAGTTTGCTT	59.49	20	CGTTCAGCCCAAAGAAGAAG	59.986	20	259	536	794	TGTTGAGCCACAGTTTGCTT	59.49	20	GGATACGTTCAGCCCAAAGA	60.074	20	264	536	799	GTTTGCTTCTCATGGATGGC	60.613	20	CGTTCAGCCCAAAGAAGAAG	59.986	20	247	548	794	gi|292618017|ref|XP_699436.4|	1196	0	PREDICTED: peptidyl-glycine alpha-amidating monooxygenase A [Danio rerio]	sp|P10731|AMD_BOVIN	951	0	Peptidyl-glycine alpha-amidating monooxygenase OS=Bos taurus GN=PAM PE=1 SV=2	all0422	56.2	4e-07	COG3391	Uncharacterized conserved protein	K00504
Unigene0131316	1	p2	(GT)9	18	2447	2464	GGCACATTTTTCCCATGACT	59.797	20	CGACAGAGACGACATCCAGA	59.98	20	227	2423	2649	GGCACATTTTTCCCATGACT	59.797	20	TCGACAGAGACGACATCCAG	59.98	20	228	2423	2650	GGCACATTTTTCCCATGACT	59.797	20	GTCGACAGAGACGACATCCA	59.827	20	229	2423	2651	gi|348518572|ref|XP_003446805.1|	1124	0	PREDICTED: dihydrolipoyllysine-residue acetyltransferase component of pyruvate dehydrogenase complex, mitochondrial [Oreochromis niloticus]	sp|Q8BMF4|ODP2_MOUSE	870	0	Dihydrolipoyllysine-residue acetyltransferase component of pyruvate dehydrogenase complex, mitochondrial OS=Mus musculus GN=Dlat PE=1 SV=2	SPCC794.07	416	1e-115	COG0508	Pyruvate/2-oxoglutarate dehydrogenase complex, dihydrolipoamide acyltransferase (E2) component, and related enzymes	K00627
Unigene0131459	1	p2	(TG)9	18	555	572	CTCAATGCCTCTGTGTCATCA	59.846	21	GTCCAGTTGACCCAAACACC	60.261	20	254	468	721	TCAATGCCTCTGTGTCATCA	58.728	20	GTCCAGTTGACCCAAACACC	60.261	20	253	469	721	CTCAATGCCTCTGTGTCATCA	59.846	21	TGTCCAGTTGACCCAAACAC	59.415	20	255	468	722	--	--	--	--	--	--	--	--	--	--	--	--	--	--
Unigene0131577	2	p2	(GA)11	22	647	668	CTACGCTAAAGCCATGAGGC	60.003	20	GGAACAGAGAGCTGGTGGAG	59.986	20	227	533	759	CTACGCTAAAGCCATGAGGC	60.003	20	AGGAACAGAGAGCTGGTGGA	59.986	20	228	533	760	GAAGTACGTGGCCTCTCTGC	60.02	20	GGAACAGAGAGCTGGTGGAG	59.986	20	143	617	759	gi|348539526|ref|XP_003457240.1|	342	5e-92	PREDICTED: 1,2-dihydroxy-3-keto-5-methylthiopentene dioxygenase-like [Oreochromis niloticus]	sp|F7FKV1|MTND_MONDO	291	1e-77	1,2-dihydroxy-3-keto-5-methylthiopentene dioxygenase OS=Monodelphis domestica GN=ADI1 PE=3 SV=1	YMR009w	128	5e-29	COG1791	Uncharacterized conserved protein, contains double-stranded beta-helix domain	K08967
Unigene0132208	1	p2	(GT)9	18	571	588	TTGCTGTCTCTGGTGAAACG	60.025	20	CTCCAGCTGCTCTCTCACCT	59.883	20	211	465	675	CCACAGACGTTATGTGACCG	60.025	20	CTCCAGCTGCTCTCTCACCT	59.883	20	133	543	675	GGACACAGACTGCCTGACAA	59.872	20	CTCCAGCTGCTCTCTCACCT	59.883	20	189	487	675	--	--	--	--	--	--	--	--	--	--	--	--	--	--
Unigene0132209	1	p2	(AC)9	18	2324	2341	GCTGAAAGGTGAAGTCGAGG	59.989	20	TTGCTGTCTCTGGTGAAACG	60.025	20	268	2178	2445	GCTGAAAGGTGAAGTCGAGG	59.989	20	CCACAGACGTTATGTGACCG	60.025	20	190	2178	2367	CCTCGCTCTCCTGAATGAAC	59.95	20	CCACAGACGTTATGTGACCG	60.025	20	273	2095	2367	gi|348505008|ref|XP_003440053.1|	1103	0	PREDICTED: acyl-coenzyme A thioesterase 11-like [Oreochromis niloticus]	sp|Q8VHQ9|ACO11_MOUSE	744	0	Acyl-coenzyme A thioesterase 11 OS=Mus musculus GN=Acot11 PE=2 SV=1	Ta0599	88.2	6e-17	COG1607	Acyl-CoA hydrolase	K12417
Unigene0132686	1	c	(GT)8ggagg(AC)9	39	2016	2054	TTGCAGCCCGTTTTACTTCT	59.883	20	CAGGCAGGTGAATAAGCTCC	59.836	20	102	1976	2077	CATTTGCAGCCCGTTTTACT	60.131	20	CAGGCAGGTGAATAAGCTCC	59.836	20	105	1973	2077	CTTTCCTTTCATTTGCAGCC	59.823	20	CAGGCAGGTGAATAAGCTCC	59.836	20	114	1964	2077	gi|348535256|ref|XP_003455117.1|	727	0	PREDICTED: endothelial cell-selective adhesion molecule-like [Oreochromis niloticus]	sp|Q95KI3|ESAM_MACFA	235	1e-60	Endothelial cell-selective adhesion molecule OS=Macaca fascicularis GN=ESAM PE=2 SV=1	--	--	--	--	--	K06787
Unigene0132972	1	p2	(AC)9	18	3119	3136	GCCTCAGTGCTGTGTGGTTA	59.905	20	CATAGAGACACGGTGAACAGG	58.229	21	140	3042	3181	GCCTCAGTGCTGTGTGGTTA	59.905	20	ACATAGAGACACGGTGAACAGG	59.136	22	141	3042	3182	GCCTCAGTGCTGTGTGGTTA	59.905	20	CATAGAGACACGGTGAACAGGT	59.136	22	140	3042	3181	gi|326672901|ref|XP_690418.5|	514	1e-143	PREDICTED: ninein-like [Danio rerio]	sp|Q6ZQ12|NINL_MOUSE	199	1e-49	Ninein-like protein OS=Mus musculus GN=Ninl PE=2 SV=3	PAB0812	117	1e-25	COG0419	ATPase involved in DNA repair	--
Unigene0133046	2	p2	(TG)9	18	126	143	GCAGCTCAGTGCGTCATAAT	59.057	20	AATTTATGGACCAGAGGGGC	60.152	20	215	52	266	GCAGCTCAGTGCGTCATAAT	59.057	20	GCCCCCACCTATAAAATGCT	60.171	20	172	52	223	GCAGCTCAGTGCGTCATAAT	59.057	20	CAGTGCCCCCACCTATAAAA	59.817	20	176	52	227	gi|348501836|ref|XP_003438475.1|	1594	0	PREDICTED: tumor necrosis factor alpha-induced protein 3 [Oreochromis niloticus]	sp|Q14571|ITPR2_HUMAN	1035	0	Inositol 1,4,5-trisphosphate receptor type 2 OS=Homo sapiens GN=ITPR2 PE=1 SV=2	--	--	--	--	--	K11859
Unigene0133091	1	p2	(GT)9	18	3398	3415	CACTCTTGAGCTCCTCCACC	59.986	20	CAGAGAGCAGTTTTCCAGCC	60.134	20	110	3356	3465	CACTTCCTTGATTCGACGGT	60.111	20	CAGAGAGCAGTTTTCCAGCC	60.134	20	136	3330	3465	CACTCTTGAGCTCCTCCACC	59.986	20	CTGACCTAACAGAGACCCCG	59.715	20	174	3356	3529	gi|348516641|ref|XP_003445846.1|	991	0	PREDICTED: transmembrane protein 39A-like [Oreochromis niloticus]	sp|Q6GL42|TM39A_XENTR	792	0	Transmembrane protein 39A OS=Xenopus tropicalis GN=tmem39a PE=2 SV=1	--	--	--	--	--	--
Unigene0133204	1	p2	(AC)11	22	1820	1841	TCACCCCGTAACACACACAT	59.726	20	CCGGTGTTCCTCTGTGTTTC	60.545	20	247	1785	2031	TCACCCCGTAACACACACAT	59.726	20	GCGTTTGCAATTTGAGTCAC	59.326	20	156	1785	1940	CCTATGTCAGACTCACCCCG	60.523	20	ACCGGTGTTCCTCTGTGTTT	59.474	20	260	1773	2032	gi|348540680|ref|XP_003457815.1|	837	0	PREDICTED: cdc42-interacting protein 4 homolog [Oreochromis niloticus]	sp|Q5U3Q6|CIP4_DANRE	691	0	Cdc42-interacting protein 4 homolog OS=Danio rerio GN=trip10 PE=2 SV=1	--	--	--	--	--	K07196
Unigene0133295	1	p2	(AG)11	22	356	377	TCTCCAGAGAAAAAGGCGAA	60.066	20	GTCTCTGGATGCAGCTGGTG	62.022	20	228	175	402	TCTCCAGAGAAAAAGGCGAA	60.066	20	TGTCTCTGGATGCAGCTGGT	62.022	20	229	175	403	TCTCCAGAGAAAAAGGCGAA	60.066	20	GTCTCTGGATGCAGCTGGT	58.93	19	228	175	402	--	--	--	--	--	--	--	--	--	--	--	--	--	--
Unigene0133368	1	p2	(GT)9	18	334	351	GGATTTGAGACACGGACGTT	59.973	20	CACGCTATCAAGCCAACAGA	60.011	20	219	165	383	CATGTCTGTCTGCCTGCAAT	59.862	20	AAAAGGCACAGTTGGCAATC	60.118	20	181	281	461	CATGTCTGTCTGCCTGCAAT	59.862	20	GAAAAGGCACAGTTGGCAAT	60.118	20	182	281	462	--	--	--	--	--	--	--	--	--	--	--	--	--	--
Unigene0133376	1	p2	(TG)10	20	488	507	GCCTCTGAGAACAGACTGGC	60.143	20	TGTGGTTAACGAAGTGATGAGG	60.03	22	232	305	536	CGAGCTGCAGTAGAGGAGGA	60.833	20	TGTGGTTAACGAAGTGATGAGG	60.03	22	212	325	536	CTGAGAACAGACTGGCCGA	60.121	19	TGTGGTTAACGAAGTGATGAGG	60.03	22	228	309	536	--	--	--	--	--	--	--	--	--	--	--	--	--	--
Unigene0133913	1	p2	(TG)10	20	141	160	GCTCTTGCCAGATCACTTGAC	60.012	21	TCACCCTCCCTAGCCCTAAT	59.919	20	167	79	245	GCTCTTGCCAGATCACTTGAC	60.012	21	ATCACCCTCCCTAGCCCTAA	59.919	20	168	79	246	GCTCTTGCCAGATCACTTGAC	60.012	21	TGACCTCCATATCACCCTCC	59.737	20	178	79	256	gi|317419845|emb|CBN81881.1|	1846	0	DNA polymerase alpha catalytic subunit [Dicentrarchus labrax]	sp|Q9DE46|DPOLA_XENLA	1511	0	DNA polymerase alpha catalytic subunit OS=Xenopus laevis GN=pola1 PE=2 SV=1	SPAC3H5.06c	599	9e-171	COG0417	DNA polymerase elongation subunit (family B)	K02320
Unigene0133942	1	p2	(GT)10	20	4569	4588	AAACAGCACAACTGTGGCAA	60.347	20	CCCTGTCACCCTGTGAAGAT	59.962	20	249	4517	4765	GCACAACTGTGGCAATGTTT	59.621	20	CCCTGTCACCCTGTGAAGAT	59.962	20	244	4522	4765	AAACAGCACAACTGTGGCAA	60.347	20	TCCTCTACCCTGTCACCCTG	60.104	20	256	4517	4772	gi|348534104|ref|XP_003454543.1|	801	0	PREDICTED: dimethyladenosine transferase 2, mitochondrial-like [Oreochromis niloticus]	sp|Q5R5C9|SCPDL_PONAB	546	9e-154	Saccharopine dehydrogenase-like oxidoreductase OS=Pongo abelii GN=SCCPDH PE=2 SV=1	ECU10g1490	172	6e-42	COG3268	Uncharacterized conserved protein	--
Unigene0133943	1	p2	(AC)10	20	1015	1034	CCCTGTCACCCTGTGAAGAT	59.962	20	AAACAGCACAACTGTGGCAA	60.347	20	249	836	1084	CCCTGTCACCCTGTGAAGAT	59.962	20	GCACAACTGTGGCAATGTTT	59.621	20	244	836	1079	TCCTCTACCCTGTCACCCTG	60.104	20	AAACAGCACAACTGTGGCAA	60.347	20	256	829	1084	gi|348534104|ref|XP_003454543.1|	801	0	PREDICTED: dimethyladenosine transferase 2, mitochondrial-like [Oreochromis niloticus]	sp|Q5R5C9|SCPDL_PONAB	546	8e-154	Saccharopine dehydrogenase-like oxidoreductase OS=Pongo abelii GN=SCCPDH PE=2 SV=1	ECU10g1490	172	6e-42	COG3268	Uncharacterized conserved protein	--
Unigene0134338	1	p2	(TG)10	20	1914	1933	TTTGCCACAGTTTTGCAAGT	59.366	20	CCCAGTAAGAATTTTGGGGG	60.525	20	250	1713	1962	CCACAGTTTTGCAAGTCAGG	59.335	20	CCCAGTAAGAATTTTGGGGG	60.525	20	246	1717	1962	GCAGAACAGAGCATGTGATGA	60.008	21	CCCAGTAAGAATTTTGGGGG	60.525	20	216	1747	1962	gi|348521005|ref|XP_003448017.1|	648	0	PREDICTED: DNA polymerase subunit gamma-2, mitochondrial-like [Oreochromis niloticus]	sp|Q9UHN1|DPOG2_HUMAN	407	1e-112	DNA polymerase subunit gamma-2, mitochondrial OS=Homo sapiens GN=POLG2 PE=1 SV=1	DR2059	112	2e-24	COG0423	Glycyl-tRNA synthetase (class II)	K02333
Unigene0134457	1	p2	(CA)9	18	5589	5606	TTGCGATAAAGCAGCATTTG	59.98	20	GCCTAGAACCAATGCGAGAG	59.978	20	198	5516	5713	TTGCGATAAAGCAGCATTTG	59.98	20	CCAATGCGAGAGATGACAGA	59.942	20	190	5516	5705	GCCTGCTTCCTCCCTCTACT	59.979	20	CCAATGCGAGAGATGACAGA	59.942	20	278	5428	5705	gi|119514176|gb|ABL75840.1|	1904	0	protocadherin 1A3 [Takifugu rubripes]	sp|Q9Y5I4|PCDC2_HUMAN	990	0	Protocadherin alpha-C2 OS=Homo sapiens GN=PCDHAC2 PE=2 SV=1	--	--	--	--	--	--
Unigene0134600	2	p2	(GT)9	18	1044	1061	TGCTCCCCCTGATAAAACTG	60.066	20	AACGCAAGAATTGATCACCA	59.127	20	246	990	1235	CCTGTATGTGTGAGGTTGCG	60.175	20	AACGCAAGAATTGATCACCA	59.127	20	222	1014	1235	TGCTCCCCCTGATAAAACTG	60.066	20	TGCACATCTGTGAGACCTTTG	59.889	21	213	990	1202	--	--	--	--	--	--	--	--	--	--	--	--	--	--
Unigene0134920	1	p2	(GT)9	18	1307	1324	ACACCTCCTGGGTCAAACAG	60.002	20	CATCAGCCACAGGACATTTG	60.112	20	175	1245	1419	ACACCTCCTGGGTCAAACAG	60.002	20	CACACACACACACTGCATCC	59.602	20	210	1245	1454	AACACCTCCTGGGTCAAACA	60.399	20	CATCAGCCACAGGACATTTG	60.112	20	176	1244	1419	--	--	--	--	--	--	--	--	--	--	--	--	--	--
Unigene0134925	1	p2	(AC)9	18	84	101	GATGAGCTGAGACTGAGGGG	59.945	20	GGAAGCGAAATAAATGGCAA	60.04	20	202	18	219	ATGAGCTGAGACTGAGGGGA	59.945	20	GGAAGCGAAATAAATGGCAA	60.04	20	201	19	219	GTGTGTGACTGCAGCCTGAT	59.905	20	GGAAGCGAAATAAATGGCAA	60.04	20	159	61	219	gi|194452381|gb|ACF71410.1|	204	1e-50	spidroin 2 [Avicularia juruensis]	sp|Q8T4N5|TSEP_GLOPP	193	3e-48	Protein TsetseEP OS=Glossina palpalis palpalis PE=4 SV=1	XF0818	122	2e-27	COG2730	Endoglucanase	K05185
Unigene0135506	2	c	(CA)6ccccc(CA)9	35	591	625	TGCTGCTTCAAAGACACACA	59.164	20	GGCTGTTTGTTCTCCACCAT	59.973	20	241	469	709	TGCTGCTTCAAAGACACACA	59.164	20	AGGCAGAATGGTGCAATAGG	60.096	20	271	469	739	CCTTAAGGTGTGCTGCTTCA	59.072	20	GGCTGTTTGTTCTCCACCAT	59.973	20	251	459	709	--	--	--	--	--	--	--	--	--	--	--	--	--	--
Unigene0135569	1	p2	(CA)9	18	253	270	GCTCGACTTCCAGTTCTTCG	60.134	20	ACAATGGCAGATTCTTTGGC	60.081	20	279	24	302	TGTTTGACAAGCTGGTGGAC	59.726	20	ACAATGGCAGATTCTTTGGC	60.081	20	223	80	302	GGTGGACGTCATCTGTGAGA	59.665	20	ACAATGGCAGATTCTTTGGC	60.081	20	210	93	302	gi|348520842|ref|XP_003447936.1|	120	1e-25	PREDICTED: ras-related protein Rab-3D-like [Oreochromis niloticus]	sp|Q63942|RAB3D_RAT	87.4	1e-16	GTP-binding protein Rab-3D OS=Rattus norvegicus GN=Rab3d PE=1 SV=2	--	--	--	--	--	K07884
Unigene0135827	1	p2	(GT)9	18	48	65	GCATGGAACTGTCTCACCCT	60.12	20	TCAACACCTCAGTCAGCACC	59.872	20	112	2	113	GCATGGAACTGTCTCACCCT	60.12	20	GTGACCAGCTCTCAGTCACG	59.603	20	174	2	175	CACCCTACTGACAGCAAGCA	60.049	20	CGTGTCTCCCATTTGTGTGT	59.441	20	206	16	221	--	--	--	--	--	--	--	--	--	--	--	--	--	--
Unigene0136024	1	p2	(CA)10	20	3298	3317	TGTCCCACTTTCCTTTGGAC	59.943	20	GGGCTCTCTACAACCTTCCC	60.074	20	198	3149	3346	TTTGAAGCCTGGAAATGAGG	60.184	20	GGGCTCTCTACAACCTTCCC	60.074	20	105	3242	3346	CCTTTGAAGCCTGGAAATGA	60.184	20	GGGCTCTCTACAACCTTCCC	60.074	20	107	3240	3346	gi|348515225|ref|XP_003445140.1|	950	0	PREDICTED: protein LCHN-like [Oreochromis niloticus]	sp|Q1LX49|LCHN_DANRE	686	0	Protein LCHN OS=Danio rerio GN=lchn PE=3 SV=1	YBR164c	242	5e-63	COG1100	GTPase SAR1 and related small G proteins	--
Unigene0136367	1	p2	(AC)9	18	1667	1684	GATGCAGGCTGTATGCATTG	60.251	20	GGCAACAGGGAAAGTGTCAT	59.973	20	265	1636	1900	GCAGGCTGTATGCATTGTTG	60.288	20	GGCAACAGGGAAAGTGTCAT	59.973	20	262	1639	1900	TGCAGGCTGTATGCATTGTT	60.288	20	GGCAACAGGGAAAGTGTCAT	59.973	20	263	1638	1900	gi|348521842|ref|XP_003448435.1|	521	1e-146	PREDICTED: hemK methyltransferase family member 1-like [Oreochromis niloticus]	sp|Q9Y5R4|HEMK1_HUMAN	293	5e-78	HemK methyltransferase family member 1 OS=Homo sapiens GN=HEMK1 PE=2 SV=1	DR0245	125	4e-28	COG2890	Methylase of polypeptide chain release factors	K00599
Unigene0136610	1	p5	(GTGAA)10	50	947	996	TCTCTGTGTCAGTGAACGCC	60.03	20	CAGCAGAAGACCAGAGAGGG	60.127	20	277	752	1028	TCTCTGTGTCAGTGAACGCC	60.03	20	CCAGCAGAAGACCAGAGAGG	60.127	20	278	752	1029	ACACAGGAGTAGGTGGTGCC	60.033	20	CAGCAGAAGACCAGAGAGGG	60.127	20	185	844	1028	gi|348509940|ref|XP_003442504.1|	582	1e-164	PREDICTED: heat shock 70 kDa protein 1-like, partial [Oreochromis niloticus]	sp|Q9I8F9|HSP71_ORYLA	570	6e-162	Heat shock 70 kDa protein 1 OS=Oryzias latipes PE=3 SV=1	SPAC13G7.02c	493	3e-139	COG0443	Molecular chaperone	K03283
Unigene0137117	1	p2	(CA)9	18	1560	1577	AAACTGTTTGGTGTTTGGCA	59.072	20	AAACGTGATCAAAACAGGGC	59.978	20	233	1532	1764	AGCTGAGCTTTCTGGACTGC	59.898	20	GGCAGGACTGGGTAACACTT	59.065	20	278	1470	1747	AGCTGAGCTTTCTGGACTGC	59.898	20	TGTGACATCACATCAGGTGC	59.047	20	224	1470	1693	gi|348527012|ref|XP_003451013.1|	653	0	PREDICTED: tuftelin-like [Oreochromis niloticus]	sp|P27628|TUFT1_BOVIN	218	2e-55	Tuftelin OS=Bos taurus GN=TUFT1 PE=2 SV=2	aq_1006	63.2	2e-09	COG0419	ATPase involved in DNA repair	--
Unigene0137195	1	p2	(TG)9	18	448	465	ATCGTCATGCATCCATGTGT	59.801	20	CCCTGGCCTGAGTATGGTTA	59.948	20	182	419	600	ATCGTCATGCATCCATGTGT	59.801	20	GCCACCCTCTCACTTCTCAC	59.841	20	145	419	563	ATGCATCCATGTGTGTGAGG	60.412	20	CCCTGGCCTGAGTATGGTTA	59.948	20	176	425	600	--	--	--	--	--	--	--	--	--	--	--	--	--	--
Unigene0137585	1	p2	(TG)11	22	160	181	GGCTGAATCACTTCCAGGTT	59.141	20	CAGTGAGGGGAGGAGTTGAG	59.828	20	152	71	222	GGCTGAATCACTTCCAGGTT	59.141	20	TGAGGGGAGGAGTTGAGTTG	60.229	20	149	71	219	GGCTGAATCACTTCCAGGTT	59.141	20	AGATGTTGCAGTGAGGGGAG	60.261	20	160	71	230	gi|348544275|ref|XP_003459607.1|	547	1e-154	PREDICTED: prohibitin-2-like [Oreochromis niloticus]	sp|A9UMS3|PHB2_XENTR	464	9e-130	Prohibitin-2 OS=Xenopus tropicalis GN=phb2 PE=2 SV=1	YGR231c	300	7e-81	COG0330	Membrane protease subunits, stomatin/prohibitin homologs	--
Unigene0139652	2	p2	(GT)10	20	137	156	CATCAGGGTCTATGGCTGGT	59.95	20	CAATGTGAAGGAGTGCGTGT	59.751	20	249	89	337	CATCAGGGTCTATGGCTGGT	59.95	20	GGCCAGAATACTCAGAGCCA	60.362	20	146	89	234	CCATCATCAGGGTCTATGGC	60.303	20	CAGAGCCAATCAGAAGACCC	59.803	20	138	85	222	gi|348544195|ref|XP_003459567.1|	2511	0	PREDICTED: period circadian protein homolog 2-like [Oreochromis niloticus]	sp|Q8QGQ8|PER2_CHICK	1235	0	Period circadian protein homolog 2 OS=Gallus gallus GN=PER2 PE=2 SV=1	STM0960	60.8	2e-08	COG1674	DNA segregation ATPase FtsK/SpoIIIE and related proteins	K02633
Unigene0140136	1	p2	(AC)10	20	415	434	ATCACCACTGAAGACCAGGG	59.962	20	ACGTGTACGTCCTTCCTCCA	60.567	20	215	244	458	ATCACCACTGAAGACCAGGG	59.962	20	CGTGTACGTCCTTCCTCCAG	60.701	20	214	244	457	TGGGACAGTCACTCATCCAG	59.659	20	CGGTGTGATGTCGTTCTGTT	59.597	20	232	323	554	gi|348522600|ref|XP_003448812.1|	147	8e-34	PREDICTED: calreticulin-like isoform 3 [Oreochromis niloticus]	sp|P15253|CALR_RABIT	103	3e-21	Calreticulin OS=Oryctolagus cuniculus GN=CALR PE=1 SV=1	YOR054c	57	7e-08	COG0452	Phosphopantothenoylcysteine synthetase/decarboxylase	K08057
Unigene0140342	1	p2	(AC)9	18	83	100	CCACCTACCAACCAGGAAAA	59.824	20	TATTATCCGCGTCATCCACA	59.914	20	188	19	206	CCAGGAAAAACAACACACGA	59.585	20	TATTATCCGCGTCATCCACA	59.914	20	177	30	206	CCACCTACCAACCAGGAAAA	59.824	20	GCCATGCATTTCAGTGTGTT	59.577	20	168	19	186	gi|68354658|ref|XP_705649.1|	112	6e-23	PREDICTED: hemogen-like isoform 1 [Danio rerio]	sp|Q2GZN9|NST1_CHAGB	57.8	2e-07	Stress response protein NST1 OS=Chaetomium globosum (strain ATCC 6205 / CBS 148.51 / DSM 1962 / NBRC 6347 / NRRL 1970) GN=NST1 PE=3 SV=1	RSp0884	52	3e-06	COG1674	DNA segregation ATPase FtsK/SpoIIIE and related proteins	K08868
Unigene0140457	1	p2	(AC)9	18	110	127	TCTGGGGAAGATGAGAAGGA	59.731	20	CCCTTCAGCACAGTCAGTCA	60.022	20	133	84	216	TCTGGGGAAGATGAGAAGGA	59.731	20	TGGTTTGAATCCCACACTGA	59.935	20	222	84	305	TCTGGGGAAGATGAGAAGGA	59.731	20	GAGCAGCAGAGGAAAAGGTG	60.134	20	276	84	359	--	--	--	--	--	--	--	--	--	--	--	--	--	--
Unigene0140866	1	p2	(CA)10	20	745	764	ACATCCCCATAGCCTCACAG	59.95	20	TTCAACATCTGGGAAAAGCC	60.051	20	269	593	861	ACATCCCCATAGCCTCACAG	59.95	20	GTGGTTTGGTGGAGAAAGGA	59.943	20	214	593	806	ACATCCCCATAGCCTCACAG	59.95	20	GGTGCCAGGCTGGATTATTA	59.923	20	234	593	826	--	--	--	--	--	--	--	--	--	--	--	--	--	--
Unigene0141114	1	p2	(TG)11	22	160	181	GGCTGAATCACTTCCAGGTT	59.141	20	CAGCAGCGTCTGTGTTTTGT	60.096	20	216	71	286	AGGCTGAATCACTTCCAGGTT	60.125	21	CAGCAGCGTCTGTGTTTTGT	60.096	20	217	70	286	GCTGAATCACTTCCAGGTTCA	60.248	21	CAGCAGCGTCTGTGTTTTGT	60.096	20	215	72	286	--	--	--	--	--	--	--	--	--	--	--	--	--	--
Unigene0141384	2	p2	(AC)9	18	735	752	AGCTGGAAACTCAGACAGGC	59.604	20	TATGAAACGTGTCCCACTCG	59.566	20	245	601	845	GCTGGAAACTCAGACAGGCT	59.604	20	TATGAAACGTGTCCCACTCG	59.566	20	244	602	845	GCTCTTAAGCCTGCTGCTGT	59.927	20	TTGACGCTCATGTTGACTGG	60.873	20	252	537	788	--	--	--	--	--	--	--	--	--	--	--	--	--	--
Unigene0141617	1	p2	(CA)10	20	1553	1572	ACCCTCATCATGGTCCTCAC	59.774	20	GGCAGAGGAACAGGAGAACA	60.386	20	265	1513	1777	ACATCCCCATAGCCTCACAG	59.95	20	ACACACAAGACCATGGCATC	59.399	20	206	1401	1606	ACCCTCATCATGGTCCTCAC	59.774	20	GTCTCTGTGCCAGCATTGTG	60.473	20	186	1513	1698	gi|348520612|ref|XP_003447821.1|	259	7e-67	PREDICTED: retinoic acid receptor responder protein 3-like [Oreochromis niloticus]	sp|Q9UL19|TIG3_HUMAN	145	3e-33	Retinoic acid receptor responder protein 3 OS=Homo sapiens GN=RARRES3 PE=1 SV=1	--	--	--	--	--	--
Unigene0142118	1	p2	(TG)11	22	27	48	TGTGTGCATCATGTGTGTGTT	59.475	21	AGGAGGAGGAAGGAGAGCAC	59.952	20	217	0	216	TGTGTGCATCATGTGTGTGTT	59.475	21	TCAGCGTACACACAGCTTCC	60.056	20	125	0	124	TGTGTGCATCATGTGTGTGTT	59.475	21	GAGGAGGAGGAGGAAGGAGA	59.883	20	221	0	220	gi|348521950|ref|XP_003448489.1|	354	9e-96	PREDICTED: heterogeneous nuclear ribonucleoproteins C1/C2-like [Oreochromis niloticus]	sp|Q9Z204|HNRPC_MOUSE	187	2e-46	Heterogeneous nuclear ribonucleoproteins C1/C2 OS=Mus musculus GN=Hnrnpc PE=1 SV=1	YJL115w	53.9	8e-07	COG5137	Histone chaperone involved in gene silencing	K12884
Unigene0142135	1	p2	(CA)10	20	400	419	GAACCCAGAGAGCCTGAGTG	59.986	20	GGGCTCTCTACAACCTTCCC	60.074	20	260	189	448	CCAGTATGTGGCAGTGATGG	59.984	20	GGGCTCTCTACAACCTTCCC	60.074	20	200	249	448	GAGAAATCTGCACCAGGGAG	59.803	20	GGGCTCTCTACAACCTTCCC	60.074	20	226	223	448	gi|226443244|ref|NP_001140094.1|	74.3	1e-11	Pancreatic secretory trypsin inhibitor precursor [Salmo salar] >gi|221221946|gb|ACM09634.1| Pancreatic secretory trypsin inhibitor [Salmo salar]	sp|P37109|ISK4_PIG	65.9	7e-10	Serine protease inhibitor Kazal-type 4 OS=Sus scrofa GN=SPINK4 PE=1 SV=1	--	--	--	--	--	K06254
Unigene0142452	1	p2	(TG)10	20	472	491	GCGCATTTGTTGGGAACTAT	59.967	20	CTGAGCCAGTTAAAGCCGTC	60.015	20	140	391	530	GCGCATTTGTTGGGAACTAT	59.967	20	TATCATCCTCCCACCTCTGC	60.034	20	256	391	646	GAACTATTTTCAACGGCGGA	60.074	20	CTGAGCCAGTTAAAGCCGTC	60.015	20	127	404	530	--	--	--	--	--	--	--	--	--	--	--	--	--	--
Unigene0142741	1	p2	(AC)9	18	83	100	CCACCTACCAACCAGGAAAA	59.824	20	TATTATCCGCGTCATCCACA	59.914	20	188	19	206	CCAGGAAAAACAACACACGA	59.585	20	TATTATCCGCGTCATCCACA	59.914	20	177	30	206	CCACCTACCAACCAGGAAAA	59.824	20	GCCATGCATTTCAGTGTGTT	59.577	20	168	19	186	gi|68354658|ref|XP_705649.1|	127	2e-27	PREDICTED: hemogen-like isoform 1 [Danio rerio]	sp|Q9BXL5|HEMGN_HUMAN	66.6	4e-10	Hemogen OS=Homo sapiens GN=HEMGN PE=1 SV=1	--	--	--	--	--	--
Unigene0143070	2	p2	(AC)10	20	654	673	CAAACACCAACACATGCACA	60.046	20	GAATGCAAAGCCTGCACATA	59.839	20	215	513	727	TTTGCTGCAATGACCTTACG	59.872	20	GAATGCAAAGCCTGCACATA	59.839	20	122	606	727	TGCTGCAATGACCTTACGAC	59.871	20	GAATGCAAAGCCTGCACATA	59.839	20	120	608	727	gi|170579958|ref|XP_001895056.1|	62.8	2e-08	Histidine-rich glycoprotein precursor [Brugia malayi]	sp|Q69566|U88_HHV6U	55.8	3e-07	Uncharacterized protein U88 OS=Human herpesvirus 6A (strain Uganda-1102) GN=U88 PE=4 SV=1	--	--	--	--	--	--
Unigene0143856	2	c	(TG)6agaaaa(TG)9	36	148	183	GAAGAGGGAGACTGCTGTGG	59.986	20	TTCTCAGATCAGCCCTGTCC	60.349	20	246	17	262	AGAGGGAGACTGCTGTGGAA	59.986	20	TTCTCAGATCAGCCCTGTCC	60.349	20	244	19	262	AAGAGGGAGACTGCTGTGGA	59.986	20	TTCTCAGATCAGCCCTGTCC	60.349	20	245	18	262	gi|326669462|ref|XP_001922445.2|	1252	0	PREDICTED: diacylglycerol kinase zeta [Danio rerio]	sp|Q13574|DGKZ_HUMAN	1065	0	Diacylglycerol kinase zeta OS=Homo sapiens GN=DGKZ PE=1 SV=3	--	--	--	--	--	K00901
Unigene0144188	1	p2	(AC)10	20	2874	2893	TGGGACAAACGATCCCTTTA	60.301	20	GCAAAACTGCAGCGTGATTA	60.021	20	220	2767	2986	TGGGACAAACGATCCCTTTA	60.301	20	AGAGAGAGCGCAAGCAAAAC	59.904	20	233	2767	2999	TGGGACAAACGATCCCTTTA	60.301	20	GAGAGAGCGCAAGCAAAACT	59.904	20	232	2767	2998	gi|348512434|ref|XP_003443748.1|	975	0	PREDICTED: beta-1-syntrophin-like [Oreochromis niloticus]	sp|Q13884|SNTB1_HUMAN	718	0	Beta-1-syntrophin OS=Homo sapiens GN=SNTB1 PE=1 SV=3	--	--	--	--	--	--
Unigene0144530	1	p2	(CA)9	18	1628	1645	GGTCACCTGAGTCCTGGTGT	60.006	20	AGCTGCAGCCCTGAGATAAG	59.74	20	275	1492	1766	TAGGGTCACCTGAGTCCTGG	60.104	20	AGCTGCAGCCCTGAGATAAG	59.74	20	278	1489	1766	GGTCACCTGAGTCCTGGTGT	60.006	20	GCTGCAGCCCTGAGATAAGT	59.603	20	274	1492	1765	gi|348524650|ref|XP_003449836.1|	680	0	PREDICTED: patatin-like phospholipase domain-containing protein 2-like [Oreochromis niloticus]	sp|P0C548|PLPL2_RAT	423	2e-117	Patatin-like phospholipase domain-containing protein 2 OS=Rattus norvegicus GN=Pnpla2 PE=2 SV=1	--	--	--	--	--	--
Unigene0144582	1	p2	(TG)9	18	2742	2759	GACCTGTACCTGCCAAGGAA	60.111	20	AGGCGAGAAGCAAAAATCAA	59.96	20	189	2713	2901	GACCTGTACCTGCCAAGGAA	60.111	20	AACTCATCAGGAGGCGAGAA	59.95	20	200	2713	2912	GCAGAAGACCTGTACCTGCC	59.874	20	AGGCGAGAAGCAAAAATCAA	59.96	20	195	2707	2901	gi|348523241|ref|XP_003449132.1|	92.8	1e-16	PREDICTED: homer protein homolog 3-like [Oreochromis niloticus]	sp|Q9Z2X5|HOME3_RAT	60.8	8e-08	Homer protein homolog 3 OS=Rattus norvegicus GN=Homer3 PE=2 SV=2	--	--	--	--	--	K15010
Unigene0145238	1	p2	(GT)10	20	2497	2516	CTGCAGAGACTTCCTCAGGG	60.127	20	AATTACAGAAAGGCCAGCGA	59.845	20	159	2395	2553	CTGCAGAGACTTCCTCAGGG	60.127	20	CCAGCGATGTCAGAAAAACA	59.84	20	146	2395	2540	GTGAGGTTCAGGAGAGTCCG	59.835	20	AATTACAGAAAGGCCAGCGA	59.845	20	110	2444	2553	gi|348512867|ref|XP_003443964.1|	1170	0	PREDICTED: pseudouridylate synthase 7 homolog [Oreochromis niloticus]	sp|Q08DI8|PUS7_BOVIN	895	0	Pseudouridylate synthase 7 homolog OS=Bos taurus GN=PUS7 PE=2 SV=1	SPBC1A4.09	343	1e-93	COG0585	Uncharacterized conserved protein	--
Unigene0145337	2	p2	(AC)9	18	550	567	CCTCTTCACCTCCCTCCTTC	60.186	20	ACTTTCGTCCAGCAGGTGAT	59.727	20	265	375	639	CCTCTTCACCTCCCTCCTTC	60.186	20	CCCTGCAGTTTGACTTTCGT	60.291	20	277	375	651	GCTCAGGCTTCAGCAAAGAT	59.723	20	ACTTTCGTCCAGCAGGTGAT	59.727	20	170	470	639	--	--	--	--	--	--	--	--	--	--	--	--	--	--
Unigene0145352	1	p3	(TCC)12	36	1400	1435	CAGTGGAAAAGGTGGAGGAA	60.081	20	CTTCTGTGAGGCTTCCCTTG	59.982	20	210	1289	1498	TGGAAAAGGTGGAGGAAGTG	60.081	20	CTTCTGTGAGGCTTCCCTTG	59.982	20	207	1292	1498	CCAGGCTTTGACAGAACACA	59.873	20	CTTCTGTGAGGCTTCCCTTG	59.982	20	167	1332	1498	gi|303304954|ref|NP_001181918.1|	349	7e-94	fibrinogen alpha chain precursor [Danio rerio] >gi|220678527|emb|CAX14636.1| fibrinogen alpha chain [Danio rerio]	sp|P02671|FIBA_HUMAN	301	2e-80	Fibrinogen alpha chain OS=Homo sapiens GN=FGA PE=1 SV=2	--	--	--	--	--	K03903
Unigene0145632	3	p2	(CA)9	18	3042	3059	ACTGTGTCTCCACACGGTGA	60.207	20	CCAATCCAATCTTGGGAGAA	59.864	20	211	2943	3153	ACTGTGTCTCCACACGGTGA	60.207	20	TTCCAATCCAATCTTGGGAG	59.864	20	213	2943	3155	TATCACGGACAGGATGGTCA	59.918	20	TCTTCAACCAGCAGCAGTGT	59.622	20	280	2848	3127	gi|106708908|gb|ABF82390.1|	775	0	MASK [Siniperca chuatsi]	sp|Q9P289|MST4_HUMAN	640	0	Serine/threonine-protein kinase MST4 OS=Homo sapiens GN=MST4 PE=1 SV=2	YAR019c	169	4e-41	COG0515	Serine/threonine protein kinase	--
Unigene0145716	1	p2	(TG)9	18	2580	2597	GGCCCTTGATTAGTATGAGGC	59.944	21	TGCAGGACTGTCAGCAGATT	59.577	20	236	2424	2659	TCTGTGTGTGTTTGTTCTCGC	59.937	21	TGCAGGACTGTCAGCAGATT	59.577	20	104	2556	2659	TCTGTGTGTGTTTGTTCTCGC	59.937	21	GAGAGAGCTCATGCCATCCT	59.516	20	234	2556	2789	gi|348511241|ref|XP_003443153.1|	409	1e-112	PREDICTED: sterol regulatory element-binding protein 2-like [Oreochromis niloticus]	sp|A3KNA7|SRBP2_DANRE	337	3e-91	Sterol regulatory element-binding protein 2 OS=Danio rerio GN=srebf2 PE=2 SV=1	--	--	--	--	--	K09107
Unigene0145845	1	p2	(CA)9	18	853	870	CAGCTGAAACAACAGGTCCA	59.873	20	AGTCAGCGAGACGGAGATGT	60.017	20	271	660	930	GTACAAATGTCAGCCGGTCC	60.384	20	AGTCAGCGAGACGGAGATGT	60.017	20	102	829	930	GTACAAATGTCAGCCGGTCC	60.384	20	GAGACCAATGCTGCTGATGA	59.95	20	173	829	1001	--	--	--	--	--	--	--	--	--	--	--	--	--	--
Unigene0145931	2	p3	(CTG)13	39	1150	1188	GTTCTCCGCAAGGAAATCTG	59.813	20	CTCTTACTGGAGGCTCGGTG	60.005	20	220	1116	1335	TGTTCTCCGCAAGGAAATCT	59.813	20	CTCTTACTGGAGGCTCGGTG	60.005	20	221	1115	1335	ATCTTGTTCTCCGCAAGGAA	59.813	20	CTCTTACTGGAGGCTCGGTG	60.005	20	225	1111	1335	gi|221047997|gb|ACL98106.1|	570	1e-160	CCAAT/enhancer-binding protein beta 2 [Epinephelus coioides]	sp|Q05826|CEBPB_CHICK	172	9e-42	CCAAT/enhancer-binding protein beta OS=Gallus gallus GN=CEBPB PE=2 SV=1	--	--	--	--	--	K10048
Unigene0146605	1	p2	(GT)9	18	27	44	TGAAATATGAATTTGGCCATAGA	58.513	23	GAGACCAGCGTCCTTCAGTC	59.993	20	148	1	148	CTGAAATATGAATTTGGCCATAGA	59.399	24	GAGACCAGCGTCCTTCAGTC	59.993	20	149	0	148	TGAAATATGAATTTGGCCATAGA	58.513	23	TGGTACAAGAACTGCCACGA	60.301	20	273	1	273	gi|348543223|ref|XP_003459083.1|	681	0	PREDICTED: tenascin-X-like [Oreochromis niloticus]	sp|P22105|TENX_HUMAN	469	2e-131	Tenascin-X OS=Homo sapiens GN=TNXB PE=1 SV=3	--	--	--	--	--	K06252
Unigene0148140	2	p2	(CA)9	18	173	190	TTCTTCCGTCCATCTTGTCC	60.05	20	TAATTGGCTGCAGACAGCAC	60.019	20	181	105	285	ATGAGGTGTCCTGCTTGTCC	60.12	20	TAATTGGCTGCAGACAGCAC	60.019	20	239	47	285	GAGGTGTCCTGCTTGTCCTC	59.841	20	TAATTGGCTGCAGACAGCAC	60.019	20	237	49	285	--	--	--	--	--	--	--	--	--	--	--	--	--	--
Unigene0148535	1	p2	(AT)11	22	523	544	GATGGTTGGAGCAGAAAACAA	60.103	21	TGCCTTTATCCCTCAACCTG	60.066	20	275	440	714	TACAGTGGATGCAGCAAAGC	60.019	20	CGCTGTAGCTGCTAAGTGGC	61.253	20	159	409	567	TGGTTGGAGCAGAAAACAACT	59.766	21	TGCCTTTATCCCTCAACCTG	60.066	20	273	442	714	gi|348509522|ref|XP_003442297.1|	358	4e-97	PREDICTED: cytochrome b-245 light chain-like [Oreochromis niloticus]	sp|Q62737|CY24A_RAT	236	3e-61	Cytochrome b-245 light chain OS=Rattus norvegicus GN=Cyba PE=2 SV=3	--	--	--	--	--	K08009
Unigene0148689	2	p3	(AGA)11	33	5200	5232	AGACAGGAAGTGACGGAGGA	59.835	20	GTGGGTTTTGGACGATTCAT	59.653	20	280	5145	5424	AGACAGGAAGTGACGGAGGA	59.835	20	CGGATCGTTGTCAATCTGAA	59.648	20	181	5145	5325	GACAGGAAGTGACGGAGGAA	60.238	20	GTGGGTTTTGGACGATTCAT	59.653	20	279	5146	5424	gi|348509125|ref|XP_003442102.1|	637	1e-180	PREDICTED: integrator complex subunit 1-like [Oreochromis niloticus]	sp|Q8N201|INT1_HUMAN	548	2e-154	Integrator complex subunit 1 OS=Homo sapiens GN=INTS1 PE=1 SV=2	--	--	--	--	--	K13138
Unigene0149794	1	p2	(GT)9	18	207	224	CATAGCTCACAAACGGGGAT	59.955	20	TAGCCCCCTTATTTGCACAC	59.96	20	199	52	250	CTTGCACATTTGATGTCGCT	59.871	20	TAGCCCCCTTATTTGCACAC	59.96	20	143	108	250	TTGCACATTTGATGTCGCTT	60.265	20	TAGCCCCCTTATTTGCACAC	59.96	20	142	109	250	--	--	--	--	--	--	--	--	--	--	--	--	--	--
Unigene0150018	1	p2	(AC)9	18	487	504	CACTACCACTGCTCAGCCAA	60.049	20	CCTTTAATGCCAGGTGGAGA	60.066	20	228	306	533	CACTACCACTGCTCAGCCAA	60.049	20	TCCTTTAATGCCAGGTGGAG	60.066	20	229	306	534	CACTACCACTGCTCAGCCAA	60.049	20	GTCCTTTAATGCCAGGTGGA	59.933	20	230	306	535	--	--	--	--	--	--	--	--	--	--	--	--	--	--
Unigene0154253	2	p2	(GT)9	18	1018	1035	TATGTGTGTGGGGGTTTGTG	60.128	20	TTCCTGACACCTATGGCCTC	60.073	20	163	992	1154	TGTATGTGTGTGGGGGTTTG	60.128	20	TTCCTGACACCTATGGCCTC	60.073	20	165	990	1154	TACGTGTATGTGTGTGGGGG	60.152	20	TTCCTGACACCTATGGCCTC	60.073	20	169	986	1154	--	--	--	--	--	--	--	--	--	--	--	--	--	--
Unigene0154391	2	p2	(GT)10	20	135	154	GAATGCAAAGCCTGCACATA	59.839	20	CAAACACCAACACATGCACA	60.046	20	215	79	293	GAATGCAAAGCCTGCACATA	59.839	20	TTTGCTGCAATGACCTTACG	59.872	20	122	79	200	GAATGCAAAGCCTGCACATA	59.839	20	TGCTGCAATGACCTTACGAC	59.871	20	120	79	198	gi|170579958|ref|XP_001895056.1|	73.2	5e-12	Histidine-rich glycoprotein precursor [Brugia malayi]	sp|Q69566|U88_HHV6U	58.2	3e-08	Uncharacterized protein U88 OS=Human herpesvirus 6A (strain Uganda-1102) GN=U88 PE=4 SV=1	--	--	--	--	--	--
